# Supplementary material
Source: publisher figshare collection journal article supplement (https://acs.figshare.com/ndownloader/files/5800275)

#### Terms & Conditions

Electronic Supporting Information files are available without a subscription to ACS Web Editions. The American Chemical Society holds a copyright ownership interest in any copyrightable Supporting Information. Files available from the ACS website may be downloaded for personal use only. Users are not otherwise permitted to reproduce, republish, redistribute, or sell any Supporting Information from the ACS website, either in whole or in part, in either machine-readable form or any other form without permission from the American Chemical Society. For permission to reproduce, republish and redistribute this material, requesters must process their own requests via the RightsLink permission system. Information about how to use the RightsLink permission system can be found at <http://pubs.acs.org/page/copyright/permissions.html>

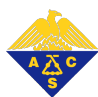

ACS Publications

MOST TRUSTED. MOST CITED. MOST READ.

Copyright © 1998 American Chemical Society

# Solid-Phase Synthesis of Diverse E- and F-Series Prostaglandins

Lorin A. Thompson, Frederick L. Moore, Young-Choon Moon, and Jonathan A. Ellman\*

*Department of Chemistry, University of California, Berkeley, CA 94720*

## Supplementary Material

### General

Unless otherwise noted, materials were obtained from commercial suppliers and used without further purification. Tetrakis(triphenylphosphine)palladium was prepared according to the literature procedure.<sup>1</sup> 3-buten-1-ol methyl ether was prepared according to the method of Brown and coworkers.<sup>2</sup> (S)-1-Octyn-3-ol was purchased from Aldrich and protected with triethylsilyl chloride under standard conditions. The alkyne 4,4-dimethyl-1-octyn-3-ol was prepared according to the literature procedure and protected with triethylsilyl chloride under standard conditions.<sup>3</sup> Tetrahydrofuran and diethyl ether were distilled under N<sub>2</sub> from sodium/benzophenone immediately before use. Pyridine and dichloromethane were distilled under N<sub>2</sub> from sodium hydride, and toluene was distilled from sodium. All reactions were run under a blanket of dry nitrogen using standard techniques unless stated otherwise. Organic layers were dried over anhydrous magnesium sulfate unless stated otherwise. Flash column chromatography was carried out using Merck 60 230-400 mesh silica gel. Thin layer chromatography (tlc) analyses were performed with Merck Kieselgel 60 F<sub>254</sub> plates and visualized using *p*-anisaldehyde staining. <sup>1</sup>H NMR spectra were obtained with a Bruker AMX-300, AMX-400, AM-400 or AM-500 FT spectrometer. Proton-decoupled <sup>13</sup>C spectra were obtained with the same instruments with a line broadening of 1.5 Hz. Chemical shifts are reported in ppm, and coupling constants are reported in Hertz. Unless otherwise noted, spectra were obtained in CDCl<sub>3</sub> with residual CHCl<sub>3</sub> as an internal standard at 7.26 ppm; spectra obtained in *d*<sub>6</sub>-DMSO were referenced to the residual DMSO at 2.49 ppm. Elemental analyses were performed by M-H-W Labs, Phoenix, AZ, or by the University of California, Berkeley, Department of Chemistry Microanalytical Laboratory. Polystyrene SX-1 beads (200-400 mesh) were obtained from Bio-Rad. Most simple resin reactions at rt were carried out in fritted cartridges (Applied Separations). It was not necessary to use distilled solvents for rinsing of resin, and in the rinsing procedure a sufficient amount of solvent was added to slurry the beads followed by agitation for approximately 30 seconds, followed by draining the solvent. A filtration cannula (Pharmacia, Uppsala, Sweden) is useful for filtration of resins in round-bottom flasks.

**Cis-(4(R)-tert-Butyldimethylsilyl)-2-bromo-cyclopentene-1,4-diol<sup>4</sup>** 4-(R)-tert-butyldimethylsilyloxy-2-cyclopentenone (6.0 g, 28 mmol) was dissolved in 90 mL of CH<sub>2</sub>Cl<sub>2</sub> in a 250 mL round-bottomed flask and chilled in an ice bath. Bromine (1.60 mL, 31.1 mmol) dissolved in 30 mL of CH<sub>2</sub>Cl<sub>2</sub> was added dropwise at a slightly slower rate than the rate at which it reacts. After TLC eluting in 1:4 ethyl acetate/hexanes indicated complete reaction, 4.5 g (45 mmol) of triethylamine dissolved in 30 mL of CH<sub>2</sub>Cl<sub>2</sub> was added and the reaction was allowed to warm to rt over 1 h. The reaction solution was then extracted with a 1.0 M sodium bisulfate solution (3 x 50 mL), a saturated NaHCO<sub>3</sub> solution (3 x 50 mL) and brine (1 x 50 mL). The aqueous layers were back-extracted with CH<sub>2</sub>Cl<sub>2</sub> (2 x 10

(1) Coulson, D. R.; Satek, L. C.; Grim S. O. *Inorg. Syn.*, **1972**, 121-124.

(2) Brown, H. C.; G. J. Lynch. *J. Org. Chem.*, **1981**, *46*, 531-538.

(3) Bernady, K. F.; Floyd, M., Jr.; Poletto, J. F.; Schaub, R. E.; Weiss, M. J. U. S. Pat. 4 123 456, 1978.

(4) Nakazawa, M.; Sakamoto, Y.; Takahashi, T.; Tomooka, K.; Ishikawa, K.; Nakai, T. *Tetrahedron Lett.* **1993**, *34*, 5923-5926.

mL) and the combined organic layers were dried over magnesium sulfate and concentrated under reduced pressure. The crude  $\alpha$ -bromoone was then dissolved in 200 mL of methanol and chilled to  $-78\text{ }^{\circ}\text{C}$ . A solution was then prepared by dissolving 6.9 g (28 mmol) of anhydrous  $\text{CeCl}_3$  in 80 mL of methanol with heating. The  $\text{CeCl}_3$  solution was added to the chilled  $\alpha$ -bromoone solution and the temperature was allowed to return to  $-78\text{ }^{\circ}\text{C}$ , at which time 1.1 g (29 mmol) of  $\text{NaBH}_4$  was added. The reaction was monitored by tlc, and when complete (10 min or less) 50 mL of a saturated  $\text{NH}_4\text{Cl}$  solution was added slowly. The solution was diluted with 50 mL of water, and extracted with  $\text{CH}_2\text{Cl}_2$  (3 x 50 mL). The organic layers were washed with a saturated  $\text{NaHCO}_3$  solution (1 x 25 mL) and brine (1 x 25 mL). The combined aqueous layers were back extracted with  $\text{CH}_2\text{Cl}_2$  (2 x 10 mL) and the combined organic layers were dried and concentrated to a brown-red oil. Chromatography eluting with 9:1 hexanes/ethyl acetate provided 7.26 g (88%) of product as a colorless oil. On storage at  $-20\text{ }^{\circ}\text{C}$  for several days the product crystallized. A small crystal was saved as a seed and used to initiate crystallization of the rest of the product from pentane at  $-20\text{ }^{\circ}\text{C}$ . White crystals (5.14 g, 62%) were obtained and found to be one diastereomer by  $^1\text{H}$  and  $^{13}\text{C}$  NMR spectroscopy. mp  $44\text{--}45\text{ }^{\circ}\text{C}$ . IR: 3378, 2926, 1620, 1256, 1033  $\text{cm}^{-1}$ .  $^1\text{H}$  NMR (500 MHz)  $\delta$  0.071 (s, 3H), 0.072 (s, 3H), 0.87 (s, 9H), 1.70 (dt, 1H,  $J = 13.5, 4.8$ ), 2.03 (d, 1H,  $J = 7.3$ ), 2.78 (dt, 1H,  $J = 13.5, 7.2$ ), 4.46 (m, 1H), 4.60 (m, 1H), 6.03 (d, 1H,  $J = 1.1$ ).  $^{13}\text{C}$  NMR (125 MHz)  $\delta$   $-4.7, 18.0, 25.8, 43.6, 73.4, 76.8, 129.4, 136.5$ .

**Compound 2.** In a round-bottomed flask 9.6 g (33 mmol) of (4(R)-tert-butyl(dimethylsilyl)-2-bromo-cyclopentene-1,4-diol (8:1 cis/trans) was dissolved in 66 mL of pyridine and 0.4 g (3.3 mmol) of 4-*N,N*-dimethylaminopyridine was added, followed by 18.4 g (49.9 mmol) of 4,4',4''-trimethoxytrityl chloride. The reaction mixture was stirred at  $50\text{ }^{\circ}\text{C}$  until tlc indicated complete reaction (approx. 1 h). The reaction solution was diluted with 200 mL of  $\text{CH}_2\text{Cl}_2$  and extracted with a 1 M citric acid solution (3 x 50 mL), a saturated  $\text{NaHCO}_3$  solution (3 x 50 mL), and brine (1 x 25 mL). The aqueous layers were separately back-extracted with  $\text{CH}_2\text{Cl}_2$  (2 x 10 mL) and the combined organic layers were dried over  $\text{Na}_2\text{SO}_4$  and concentrated in vacuo. The product was purified by chromatography eluting with 4:1 ethyl acetate/hexanes to afford 20.2 g (98%) of the title compound as a white foam. IR: 3394, 2955, 1608, 1508, 1251, 1176, 1038, 830  $\text{cm}^{-1}$ .  $^1\text{H}$  NMR (400 MHz)  $\delta$   $-0.20$  (s, 3H), 0.15 (s, 3H), 0.86 (s, 9H), 1.71 (m, 1H), 2.17 (m, 1H), 3.82 (s, 9H), 4.24 (t, 1H,  $J = 6.3$ ), 4.46 (dt, 1H,  $J = 1.7, 6.1$ ), 6.07 (t, 1H,  $J = 1.7$ ), 6.84 (d, 6H,  $J = 8.9$ ), 7.46 (d, 6H,  $J = 8.9$ ).  $^{13}\text{C}$  NMR (100 MHz)  $\delta$   $-4.7, -4.6, 18.0, 25.7, 43.5, 55.1, 73.5, 76.7, 86.2, 112.9, 127.7, 130.4, 137.1, 137.2, 158.5$ . Anal. Calcd. for  $\text{C}_{33}\text{H}_{41}\text{O}_5\text{SiBr}$ : C, 63.35; H, 6.61. Found: C, 63.23; H, 6.67.

**Compound 3.** Compound 2 (20.2 g, 32.3 mmol) was dissolved in 50 mL of THF and 50 mL of a 1 M solution of TBAF in THF was added. The reaction solution was stirred at rt until tlc indicated completion, and then 100 mL of diethyl ether was added and the reaction solution was extracted with water (3 x 25 mL) and brine (1 x 25 mL). The aqueous layers were back-extracted with  $\text{CH}_2\text{Cl}_2$  (2x 10 mL) and the combined organic layers were dried over  $\text{Na}_2\text{SO}_4$ . Chromatography eluting with 9:1 hexanes/ethyl acetate affords 15.4 g (94%) of the title compound as a white foamy solid. IR: 3388, 1607, 1507, 1249, 1176, 1033, 830  $\text{cm}^{-1}$ .  $^1\text{H}$  NMR (300 MHz)  $\delta$  1.0 (m, 1H), 1.64 (s, 1H, OH) 1.75 (dt, 1H,  $J = 7.0, 7.0$ ) 3.79 (s, 9H), 4.25 (s, br, 1H), 4.50 (t, 1H,  $J = 5.6$ ) 6.16 (s, 1H), 6.82 (d, 6H,  $J = 8.9$ ), 7.47 (d, 6H,  $J = 8.9$ ).  $^{13}\text{C}$  NMR (75 MHz)  $\delta$  42.9, 55.1, 73.4, 77.5, 86.5, 113.0, 129.1, 130.3, 136.9, 137.2, 158.4. Anal. calcd. for  $\text{C}_{27}\text{H}_{27}\text{O}_5\text{Br}$ : C, 63.41; H, 5.32. Found: C, 63.14; H, 5.54.

**Compound 5.** A round-bottomed flask was charged with 20 mL of THF, and the solvent was chilled to  $-78\text{ }^{\circ}\text{C}$ . To the flask was added 13.2 mL of a 1.5 M solution of *tert*-butyllithium (19.8 mmol) in pentane. A solution of 5.9 g (9.4 mmol) of compound 2 (8:1 cis/trans) dissolved in 20 mL of THF was then added dropwise via syringe pump. After the addition was complete, 0.84 g (9.4 mmol) of copper cyanide was added and the solution was warmed to  $-40\text{ }^{\circ}\text{C}$  for 15 min, at which time the solution became

homogeneous. The reaction solution was re-chilled to -78 °C and a solution of 2.0 g (10 mmol) of (Z)-1,3-dibromo-1-propene dissolved in 10 mL of THF was added dropwise via syringe pump. The reaction solution was stirred for 1 h at -78 °C and then the cooling bath was removed and the reaction solution was allowed to warm to -20 °C. The reaction was quenched by the addition of 30 mL of a saturated NH<sub>4</sub>Cl solution, and 50 mL of diethyl ether was added. The aqueous layer was separated, and the organic layer was washed with 30 mL of a saturated NH<sub>4</sub>Cl solution and 30 mL of brine. The combined aqueous layers were back-extracted with ether (2 x 10 mL) and the combined organic layers were dried over Na<sub>2</sub>SO<sub>4</sub> and concentrated in vacuo. Chromatography eluting with a gradient of 9:1 hexanes/ethyl acetate increasing to 4:1 hexanes/ethyl acetate afforded 3.2 g (51%) of a white foamy solid. The solid (3.00 g, 4.44 mmol) was then dissolved in 10 mL of THF and treated with 11 mL of a 1 M solution of TBAF in THF (11 mmol). The reaction mixture was stirred at rt until tlc indicated completion (approx. 4 h) and then 20 mL of ether was added and the reaction solution was extracted with water (3 x 10 mL) and brine (1 x 10 mL). The combined aqueous layers were back-extracted with ether (2 x 10 mL) and the combined organic layers were dried over Na<sub>2</sub>SO<sub>4</sub> and concentrated in vacuo.

Chromatography eluting with a gradient of 19:1 hexanes/ethyl acetate increasing to 9:1 hexanes/ethyl acetate afforded 1.8 g (73%) of the title compound as a white foam. IR: 3406, 2835, 1607, 1507, 1249, 1176, 1035, 829 cm<sup>-1</sup>. <sup>1</sup>H NMR (500 MHz) δ 1.25 (m, 1H), 1.58 (s, 1H, OH) 1.98 (m, 1H), 2.73 (dd, 1H, J = 17.6, 6.7), 3.14 (dd, 1H, J = 17.7, 6.3), 3.79 (s, 9H), 4.33 (s, br, 1H), 4.38 (t, 1H, J = 6.0), 5.57 (s, 1H), 6.18 (dt, 1H, J = 7.0, 7.0), 6.25 (d, 1H, J = 7.0), 6.83 (d, 6H, J = 8.9), 7.39 (d, 6H, J = 8.9). <sup>13</sup>C NMR (125 MHz) δ 29.4, 44.1, 55.2, 73.8, 77.2, 86.3, 109.0, 113.0, 130.2, 130.3, 131.9, 137.4, 146.3, 158.4. Anal. Calcd. for C<sub>30</sub>H<sub>31</sub>O<sub>5</sub>Br: C, 65.34; H, 5.67. Found: C, 65.29; H, 5.77.

**Sodium 1-(benzenesulfonamido)-6-heptenoate.** In a 500 mL round-bottomed flask 6-heptenoioc acid<sup>5</sup> (5.25 g, 41.0 mmol) was dissolved in 160 mL of THF and the solution was chilled to -15 °C. *N*-methylmorpholine (3.93 g, 38.9 mmol) was added, followed by isobutyl chloroformate (5.32 g, 38.9 mmol) at a dropwise rate over 15 min. When the addition was complete, a portion of *N,N*-dimethylaminopyridine (0.24 g, 2.0 mmol) was added, followed by a solution of benzenesulfonamide (6.13 g, 38.9 mmol) and *N*-methylmorpholine (3.93 g, 38.9 mmol) dissolved in 40 mL of DMF. The cooling bath was removed, and the solution was stirred for 2 h. The reaction mixture was poured into 40 mL of a 1 M NaHSO<sub>4</sub> solution in a separatory funnel and the organic layer was separated. The aqueous layer was extracted with ethyl acetate (2 x 10 mL) and the combined organic layers were extracted once with 20 mL of a saturated NaHCO<sub>3</sub> solution and once with 20 mL of brine. The aqueous layers were back-extracted with 10 mL of ethyl acetate and the combined organic layers were dried and concentrated in vacuo.

Chromatography eluting with 3:1:1 hexanes/ethyl acetate/CH<sub>2</sub>Cl<sub>2</sub> removes unreacted benzenesulfonamide. Bulb to bulb distillation at 0.05 torr provides unreacted carboxylic acid (1.5 g, 29%, b.p. 80-100 °C, uncorrected) followed by 7.00 g (67%) of 1-benzenesulfonamido-6-heptenoic acid, b.p. 120-140 °C. The purified *N*-acylsulfonamide (7.00 g, 26.2 mmol) is dissolved in 100 mL of CH<sub>3</sub>OH, and 0.500 g (21.8 mmol) of sodium is added in small pieces. After the metal has completely dissolved, the solvent is removed in vacuo to yield a white powder. Trituration with dry toluene until no more sulfonamide is visible by tlc gives 6.22 g (82%) of the analytically pure sodium salt. IR (KBr): 2929, 1602, 1446, 1377, 1233, 1136, 1093, 853 cm<sup>-1</sup>. <sup>1</sup>H NMR (400 MHz, DMSO) δ 1.19 (quint, 2H, J = 7.5), 1.38 (quint, 2H, J = 7.5), 1.90 (q, 2H, J = 6.9), 2.06 (t, 2H, J = 7.3), 4.8-5.0 (m, 2H), 5.71-5.82 (m, 1H), 7.56 (t, 2H, J = 7.4), 7.67 (t, 1H, J = 7.4), 8.08 (d, 2H, J = 7.9) <sup>13</sup>C NMR (100 MHz, DMSO) δ 29.5, 32.8, 38.0,

(5) Although 6-heptenoic acid is commercially available from Aldrich, it is relatively expensive (~\$45/g). It can easily be prepared from 7-octene-1,2-diol (\$1.50/g) by sodium periodate cleavage followed by Jones oxidation and distillation in 70% overall yield.

42.2, 119.8, 132.0, 133.5, 136.9, 143.7, 147.8, 180.0. Anal. Calcd. For  $C_{13}H_{16}NNaO_3S$ : C, 53.97; H, 5.57; N, 4.84. Found: C, 54.00; H, 5.60; N, 4.90.

**Bromopolystyrene (1.0 mmol/g):** 30 g of Bio-Rad SX-1 beads are placed in a 500 mL round-bottomed flask and solvated in 300 mL of dry  $CCl_4$ . Thallium(III) acetate (1.00 g, 2.62 mmol) was added and the flask was covered with aluminum foil and the reaction mixture was stirred 30 min at rt. **CAUTION: Thallium acetate is a known poison. Handle only using proper safety precautions in a well ventilated hood.** The flask was placed on a heating mantle and 5.75 g (36 mmol) of bromine was added via syringe. The slurry was heated to reflux, and stirred at that temperature for 1.5 h. The slurry typically loses the red-brown color of bromine after about 10 min at reflux, and remains a dark reddish-brown until workup. The slurry was then allowed to cool to rt, and the beads were isolated by filtration on a coarse 600 mL glass fritted funnel. The beads were then washed with 1:1 acetone/water (3x), acetone (3x), benzene (3x) and methanol (3x) and dried in vacuo to yield 35.5 g (99%) of dry beads.

**Chlorodibutylsilyl-derived polystyrene:** Bromopolystyrene beads (10 g, 1.0 mmol/g, 20 mmol) were placed in a flask with a sidearm separated by a coarse filter. The beads were solvated in 100 mL of dry toluene, and 20 mL of 2.5 M n-BuLi in hexanes was added. The slurry was heated to 60 °C for 3 h and then allowed to cool to rt. The reaction solvent was drained through the sidearm, and the beads were washed with dry toluene (3x) and dry THF (3-5x, until the solvent drained was no longer bright yellow). The last portion of THF was removed, and the flask was placed in a bath at -20 °C. Enough dry THF to slurry the beads (approx. 30 mL) was added, followed by dichlorodibutylsilane (8.53 g, 0.0400 mol) distilled from sodium carbonate. The cooling bath was removed, and the reaction mixture was stirred for 2 h. The beads were then washed with distilled THF (3x), and distilled ether (3x) and dried with a stream of dry nitrogen. The chlorodibutylsilyl-derivatized beads are very sensitive to any moisture. For this reason, the loading step is typically performed without fully drying the beads or removing them from the nitrogen atmosphere.

**Loading dibutylsilyl-derived polystyrene beads:** Chlorodibutylsilyl-derivatized beads (7.0 g, 7.0 mmol) prepared above were swollen in 70 mL of dry  $CH_2Cl_2$ . Imidazole (1.42 g, 21.0 mmol) was added followed by 1.8 g (3.3 mmol) of compound **5**. The slurry was stirred at rt for 2 h, and then methanol (7 mL) was added and the slurry was stirred an additional 15 min. The solvents were then removed by filtration and the beads were washed with DMF/water 1:1 (3 x), DMF (3x),  $CH_2Cl_2$  (3x), and ether (3x) and dried first by flushing with  $N_2$  and then in vacuo (0.05 torr). TMT quantitation ( $\epsilon_{484} = 87\ 100$ ) gives a loading level of 0.35 mmol/g of beads, and 7.42 g of beads are recovered (80% loading efficiency). The alcohol **3** was loaded in an identical manner.

#### TMT Quantitation

The procedure is very similar to the DMT quantitation, described by Caruthers and coworkers, *Meth. Enzymol.* **1987**, *154*, 287-313. A 5 - 10 mg portion of resin **3** or **5** is weighed into a 10.0 mL volumetric flask. The TMT cation is released by addition of 10.0 mL of 3% trichloroacetic acid in  $CH_2Cl_2$ . The bright orange solution (100 mL) is diluted to 4.0 mL with a 0.1 M solution of *p*-toluenesulfonic acid monohydrate in acetonitrile, and the resulting solution is analyzed spectrophotometrically at 484 nm. The resin loading is calculated by the following equation:

$$\text{Loading (mmol/g)} = \frac{\text{Absorbance}}{217.75 \times (\text{amount of resin in grams})}$$

The extinction coefficient of the TMT cation was determined by a 5-point titration curve collecting two repetitions per point with a 0.1 M solution of *p*-toluenesulfonic acid monohydrate in acetonitrile, and was determined to be 87,100 at 484 nm with a R value of 0.9999.

**Solid-phase synthesis of prostaglandins. TMT Cleavage.** Polystyrene beads (1.0 g, 0.46 mmol/g) loaded with the core **3** or **5** are placed in a fritted syringe and

solvated in 10 mL of  $\text{CH}_2\text{Cl}_2$ . The solvent is removed, and 10 mL of a 1 M solution of formic acid in  $\text{CH}_2\text{Cl}_2$  is added. The solution is removed after 1.0 min and the beads are quickly rinsed with  $\text{CH}_2\text{Cl}_2$  (3 x 10 mL). This procedure is repeated 4 times for a total  $\text{HCOOH}$  contact time of 5 min. After the last subsection the beads are rinsed with DMF (3x),  $\text{CH}_2\text{Cl}_2$  (3x), and then THF (3x) and taken directly to the next step.

**Suzuki-Miyaura coupling.** An alkene (2.5 mmol) is dissolved in 10 mL of THF and treated with 0.28 g (2.3 mmol) of 9-BBN. The reaction solution is stirred for 6 h at rt. Separately, 1 g of resin **7** or **11** (0.46 mmol/g, 0.46 mmol) is placed in a 50 mL round-bottomed flask. The solution of the hydroborated alkene is added via cannula. A 2.5 mL portion of 2 M  $\text{Na}_2\text{CO}_3$  is then degassed by bubbling nitrogen through the solution for 10 min, and then the degassed solution is added to the solvated beads. The flask is then charged with 75 mg of  $\text{Pd}(\text{PPh}_3)_4$  (0.065 mmol) and a condenser is placed on the flask. The solution is heated to reflux and stirred at that temperature for 12 h. The slurry is allowed to cool, and then the beads are washed with DMF/water (3x), DMF (3x),  $\text{CH}_2\text{Cl}_2$  (3x), and ether (3x) and dried *in vacuo*.

**Oxidation.** Support-bound alcohol beads from above (1.0 g, 0.46 mmol/g, 0.46 mmol) are placed in a 50 mL round-bottomed flask and solvated in 10 mL of  $\text{CH}_2\text{Cl}_2$ . A 0.6 g (1.41 mmol) portion of Dess-Martin periodinane is then added and a condenser is placed on the flask. The slurry is heated to reflux for 2 h, and then allowed to cool to rt. The beads are then washed with DMF (3x),  $\text{CH}_2\text{Cl}_2$  (3x), and ether (3x) and dried *in vacuo*.

**Cuprate addition:** A solution of 1.00 mmol of an 1-alkyne in 5 mL of THF is treated with 0.257 g (1.00 mmol) of  $\text{Cp}_2\text{ZrHCl}$ . After 20 min at rt, the homogeneous solution is chilled to  $-78^\circ\text{C}$  and treated with 2.0 mmol of a 1.4 M solution of methyllithium in diethyl ether. After 15 min copper (I) cyanide (89.6 mg, 1.00 mmol) is added, followed by an additional 1.0 mmol of 1.4 M methyllithium in ether. The solution is warmed to  $-20^\circ\text{C}$  for 15 min, at which time it again becomes homogeneous, and then the solution is re-chilled to  $-78^\circ\text{C}$ . In a separate flask, support-bound enone beads **8** or **12** from above (0.40 g, 0.50 mmol/g, 0.20 mmol) are solvated in 3 mL of THF. The slurry is chilled to  $-78^\circ\text{C}$  and the chilled cuprate solution is added to the beads by teflon cannula. The reaction slurry is stirred at  $-78^\circ\text{C}$  for 30 min and then warmed to  $-20^\circ\text{C}$  for 15 min to ensure complete reaction. The solution is then re-chilled to  $-78^\circ\text{C}$  and the reaction is quenched by the addition of 10 mL of a chilled ( $-78^\circ\text{C}$ ) 10% solution of acetic acid in THF. The solution is removed and the beads are rinsed with 1:1 DMF/water (3x), DMF (3x),  $\text{CH}_2\text{Cl}_2$ , and ether (3x).

**Optional Reduction:** Resin (0.40 g, 0.46 mmol/g, 0.18 mmol) is swollen in 4.0 mL of THF. The slurry is chilled to  $-78^\circ\text{C}$  and 1.0 mL of a 1 M solution of L-selectride in THF is added. The slurry is stirred at  $-78^\circ\text{C}$  for 1 h and then quenched with 10 mL of a prechilled 10% solution of acetic acid in THF. The solution is removed and the beads are rinsed with 1:1 DMF/water (3x), DMF (3x),  $\text{CH}_2\text{Cl}_2$ , and ether (3x).

**Activation of N-acylsulfonamide resin:** Resin (0.40 g, 0.46 mmol/g, 0.18 mmol) is solvated in 4 mL of dry N-methylpyrrolidone. Bromoacetonitrile is run through a plug of activated basic alumina, and then 0.48 g (4.0 mmol) of bromoacetonitrile is added to the resin slurry with slow stirring. Diisopropylethylamine (0.26 g, 2 mmol) is then added, and the reaction slurry is slowly stirred for 6 h. The solution is removed and the beads are rinsed with NMP (3x),  $\text{CH}_2\text{Cl}_2$ , and ether (3x).

**Displacement of the activated sulfonamide:** The resin (0.20 g, 0.45 mmol/g, 0.090 mmol) is solvated in 2.0 mL of dry NMP. **For amines:** 2.0 mmol of an amine is added and the slurry is stirred for 15 min at rt. The solution is removed and the beads are rinsed with DMF (3x),  $\text{CH}_2\text{Cl}_2$ , and ether (3x). **For alcohols:** 4.0 mmol of an alcohol and 33 mg (0.27 mmol) of N,N-dimethylaminopyridine are added. The reaction slurry is heated to  $50^\circ\text{C}$  and stirred for 6 h (methanol and ethanol) or 8 h (isopropanol). The solution is removed and the beads are rinsed with DMF (3x),  $\text{CH}_2\text{Cl}_2$ , and ether (3x).

**Cleavage:** Beads (0.20 g, 0.45 mmol/g, 0.090 mmol) are swollen in THF in a disposable glass vial. HF/pyridine solution (17.5% HF, 0.5 mL) is added, and the slurry

is stirred at rt for 2 h. The beads are separated from the solution and washed with 2 additional 1 mL portions of THF. The combined THF layers are diluted with 5 mL of ethyl acetate and the organic layer is washed with a saturated bicarbonate solution (2 x 5 mL) and brine (1 x 5 mL). The combined aqueous layers are back-extracted with 3 x 2 mL of ethyl acetate, and the combined organic layers are dried and concentrated. Chromatography eluting with a gradient of 3:2 ethyl acetate/hexanes increasing to 4:1 ethyl acetate/hexanes provides the E series prostaglandins and chromatography eluting with a gradient of 4:1 ethylacetate/hexanes increasing to pure ethyl acetate provides the F series prostaglandins.

**Physical properties of prostaglandins in table 1.**

For most of the prostaglandins isolated, the alcohol OH peaks were very broad or rapidly exchanged with water in the solvent, and are not reported except where noted in entry 10.

**Entry 1.** IR: 3386, 2930, 1744, 1120, 1078  $\text{cm}^{-1}$ .  $^1\text{H}$  NMR (300 MHz)  $\delta$  0.88 (t, 3H,  $J = 6.8$ ), 1.20-1.45 (m, 7H), 1.45-1.61 (m, 4H), 2.01 (q, 2H,  $J = 7.3$ ), 2.07 (dt, 1H,  $J = 11.6, 5.8$ ), 2.19 (dd, 1H,  $J = 18.5, 9.9$ ), 2.30-2.42 (m, 4H), 2.73 (ddd, 1H,  $J = 19.6, 7.4, 1.2$ ), 3.31 (s, 3H), 3.36 (t, 2H,  $J = 6.4$ ), 4.00-4.10 (m, 2H), 5.22-5.32 (m, 1H), 5.36-5.47 (m, 1H), 5.56 (dd, 1H,  $J = 15.2, 8.2$ ), 5.63 (dd, 1H,  $J = 15.2, 7.5$ ).  $^{13}\text{C}$  NMR (100 MHz)  $\delta$  14.0, 22.6, 25.0, 25.2, 26.0, 27.1, 29.2, 31.7, 37.3, 46.1, 53.7, 54.6, 58.5, 72.0, 72.7, 73.0, 125.6, 131.4, 131.9, 136.9, 214.2. HRMS (FAB, m-nitrobenzyl alcohol + LiCl) calcd. for  $\text{C}_{21}\text{H}_{36}\text{O}_4\text{Li}$  (M+Li) 359.277364, found 359.277100. Anal. Calcd. for  $\text{C}_{21}\text{H}_{34}\text{O}_4$ : C, 71.55; H, 10.29. Found: C, 71.45; H, 10.08.

**Entry 2.** IR 3374, 2228, 2857, 1743, 1077, 1154, 968  $\text{cm}^{-1}$ .  $^1\text{H}$  NMR (500 MHz)  $\delta$  0.87 (t, 3H,  $J = 6.8$ ), 0.88 (t, 3H,  $J = 6.9$ ), 1.20-1.35 (m, 14H), 1.45-1.52 (m, 1H), 1.52-1.60 (m, 1H), 1.97 (q, 2H,  $J = 7.1$ ), 2.08 (dt, 1H,  $J = 12.2, 5.4$ ), 2.18 (dd, 1H,  $J = 10.0, 10.0$ ), 2.33 (t, 2H,  $J = 6.4$ ), 2.38 (m, 1H), 2.72 (dd, 1H,  $J = 18.2, 7.2$ ), 4.03 (q, 1H,  $J = 8.8$ ), 4.08 (q, 1H,  $J = 6.9$ ), 5.20-5.27 (m, 1H), 5.39-5.44 (m, 1H), 5.51 (dd, 1H,  $J = 15.2, 8.8$ ), 5.62 (dd, 1H,  $J = 15.2, 7.7$ ).  $^{13}\text{C}$  NMR (125 MHz)  $\delta$  14.0, 14.1, 22.6, 22.6, 24.9, 25.2, 27.4, 29.0, 29.5, 31.7, 31.8, 37.3, 46.1, 53.8, 54.7, 71.9, 73.3, 125.0, 132.1, 132.4, 136.8, 214.2. Anal. Calcd. for  $\text{C}_{22}\text{H}_{38}\text{O}_3$ : C, 75.38; H, 10.93. Found: C, 75.44; H, 10.70.

**Entry 3.** This compound was isolated as an approximate 1:1 mixture of diastereomers at the  $\text{C}_{15}$  hydroxyl group. IR: 3438, 2932, 2862, 1743, 1118, 1082  $\text{cm}^{-1}$ .  $^1\text{H}$  NMR (400 MHz)  $\delta$  0.76 (m, 18H), 1.15-1.40 (m, 14H), 1.50-1.60 (m, 4H), 1.90-2.25 (m, 10H), 2.35-2.24 (m, 6H), 2.70 (t, 1H,  $J = 6.6$ ), 2.74 (t, 1H,  $J = 6.6$ ), 3.30 (s, 3H), 3.31 (s, 3H), 3.35 (m, 2H), 3.36 (m, 2H), 3.74 (d, 1H,  $J = 7.8$ ), 3.84 (d, 1H,  $J = 6.7$ ), 4.03 (q, 1H,  $J = 7.8$ ), 4.06 (q, 1H,  $J = 7.5$ ), 5.24-5.54 (m, 2H), 5.36-5.46 (m, 2H), 5.57 (dd, 1H,  $J = 15.2, 9.0$ ), 5.60 (dd, 1H,  $J = 15.2, 9.0$ ), 5.71 (dd, 1H,  $J = 15.2, 6.8$ ), 5.73 (dd, 1H,  $J = 15.2, 6.8$ ).  $^{13}\text{C}$  NMR (100 MHz)  $\delta$  14.1, 22.7, 22.8, 23.0, 23.7, 25.0, 25.1, 25.9, 26.0, 27.1, 29.2, 29.2, 37.1, 37.4, 38.6, 38.7, 46.2, 46.4, 53.3, 53.8, 54.6, 54.7, 58.5, 72.0, 72.2, 72.7, 72.7, 79.0, 79.9, 125.6, 125.6, 131.1, 131.9, 132.0, 133.5, 133.8, 214.3. HRMS (FAB, m-nitrobenzyl alcohol + LiCl) calcd. for  $\text{C}_{23}\text{H}_{40}\text{O}_4\text{Li}$  (M+Li) 387.308665, found 387.308500.

**Entry 4.** IR: 3375, 2929, 2858, 1457, 1120, 969  $\text{cm}^{-1}$ .  $^1\text{H}$  NMR (500 MHz)  $\delta$  0.88 (t, 3H,  $J = 6.6$ ), 1.23-1.53 (m, 9H), 1.53-1.66 (m, 4H), 1.71 (dd, 1H, 14.7, 3.0), 2.23-2.28 (m, 3H), 2.20-2.30 (m, 3H), 3.32 (s, 3H), 3.37 (t, 2H,  $J = 6.5\text{H}$ ), 3.90 (m, br, 1H), 4.04 (q, 1H,  $J = 7.0$ ), 4.15 (m, br, 1H), 5.38-5.42 (m, 2H), 5.45 (dd, 1H,  $J = 15.2, 7.4$ ), 5.54 (dd, 1H, 15.2, 7.4).  $^{13}\text{C}$  NMR (125 MHz)  $\delta$  14.0, 22.6, 25.2, 25.5, 26.1, 27.0, 29.1, 31.7, 37.2, 42.8, 50.1, 55.7, 58.5, 72.7, 72.7, 73.1, 77.7, 128.2, 130.6, 132.9, 135.4. HRMS (FAB, m-nitrobenzyl alcohol) calcd. for  $\text{C}_{21}\text{H}_{39}\text{O}_4$  (M+H) 355.284835, found 355.284710. Anal. Calcd. for  $\text{C}_{21}\text{H}_{38}\text{O}_4$ : C, 71.14; H, 10.80. Found: C, 71.01; H, 10.59.

**Entry 5.** IR: 3367, 2925, 2856, 1738, 1075  $\text{cm}^{-1}$ .  $^1\text{H}$  NMR 500 (MHz)  $\delta$  0.85 (t, 3H,  $J = 7.1$ ), 0.87 (t, 3H,  $J = 6.6$ ), 1.14-1.35 (m, 13H), 1.35-1.52 (m, 2H), 1.52-1.66 (m, 2H), 1.97 (dt, 1H,  $J = 12.1, 6.0$ ), 2.20 (dd, 1H,  $J = 18.3, 10.0$ ), 2.31 (dt, 1H,  $J = 12.1,$

8.9), 2.70 (dd, 1H, J = 18.4, 7.4), 2.92 (s, br, 1H), 4.00 (q, 1H, J = 8.6), 4.07 (q, 1H, J = 7.1), 5.51 (dd, 1H, J = 15.2, 8.9), 5.62 (dd, 1H, J = 15.2, 7.8).  $^{13}\text{C}$  NMR (125 MHz)  $\delta$  14.0, 14.0, 22.6, 25.1, 26.8, 27.8, 29.4, 29.7, 31.6, 31.6, 37.2, 45.8, 54.6, 55.0, 71.8, 73.3, 132.5, 136.6, 214.8. HRMS (FAB, m-nitrobenzyl alcohol + LiCl) calcd. for  $\text{C}_{19}\text{H}_{34}\text{O}_3\text{Li}$  (M+Li) 317.266800, found 317.266370.

**Entry 6.** IR: 3354, 2927, 2856, 1458, 1339, 1078, 971, 750  $\text{cm}^{-1}$ .  $^1\text{H}$  NMR (500 MHz)  $\delta$  0.87 (t, 3H, J = 6.7), 0.88 (t, 3H, J = 6.8), 1.20-1.60 (m, 18H), 2.18 (dd, 1H, J = 14.7, 3.1), 2.20-2.30 (m, 2H), 2.55-2.65 (m, 1H), 3.96 (s, br, 1H), 4.09 (q, 1H, J = 6.9), 4.22 (s, br, 1H), 5.51 (dd, 1H, J = 15.2, 8.9), 5.58 (dd, 1H, J = 15.2, 7.6).  $^{13}\text{C}$  NMR (100 MHz)  $\delta$  14.0, 14.0, 22.6, 22.6, 25.1, 28.0, 28.1, 29.6, 31.7, 31.8, 37.3, 43.0, 50.6, 56.3, 72.6, 73.6, 78.6, 132.3, 134.4. Anal. Calcd. for  $\text{C}_{19}\text{H}_{36}\text{O}_3$ : C, 73.03; H, 11.61. Found: C, 72.82; H, 11.99.

**Entry 7.** IR: 3374, 2931, 2858, 1735, 1450, 1345, 1170, 1087  $\text{cm}^{-1}$ .  $^1\text{H}$  NMR (500 MHz)  $\delta$  0.86 (t, 3H, J = 6.8), 1.15-1.40 (m, 11H), 1.50-1.65 (m, 6H), 1.97-2.05 (m, 1H), 2.17-2.30 (m, 4H), 2.32-3.41 (m, 1H), 2.72 (dd, 1H, J = 18.6, 7.3), 4.00-4.15 (m, 2H), 5.55 (dd, 1H, J = 15.2, 8.7), 5.65 (dd, 1H, J = 15.2, 7.1), 7.52 (t, 2H, J = 7.6), 7.62 (t, 1H, J = 7.4), 8.03 (d, 2H, J = 8.6).  $^{13}\text{C}$  NMR (125 MHz)  $\delta$  14.0, 22.6, 24.1, 25.1, 26.1, 27.2, 28.3, 28.8, 31.6, 36.2, 37.1, 46.0, 54.3, 54.4, 71.8, 73.0, 128.1, 128.9, 131.6, 133.8, 136.7, 138.8, 171.8, 215.7. Anal. Calcd. for  $\text{C}_{26}\text{H}_{39}\text{NO}_6\text{S}$ : C, 63.26; H, 7.96; N, 2.84. Found: C, 63.01; H, 7.81; N, 2.83.

**Entry 8.** IR: 3351, 2932, 2858, 1739, 1652, 1545, 1078  $\text{cm}^{-1}$ .  $^1\text{H}$  NMR  $\delta$  (300 MHz) 0.87 (t, 3H, J = 16.1), 1.15-1.65 (m, 17H), 1.96 (dt, 2H, J = 12.0, 6.0), 2.13-2.25 (m, 3H), 2.27-2.39 (m, 1H), 2.69 (dd, 1H, J = 17.7, 7.1), 4.00 (q, 1H, J = 8.3), 4.05-4.10 (m, 1H), 4.41 (d, 2H, J = 5.7), 5.54 (dd, 1H, J = 15.2, 8.5), 5.63 (dd, 1H, J = 15.2, 7.1), 5.90 (s, br, 1H), 7.20-7.40 (m, 5H).  $^{13}\text{C}$  NMR (125 MHz)  $\delta$  14.0, 22.6, 25.1, 25.4, 26.3, 27.5, 28.8, 29.1, 31.7, 36.6, 37.2, 43.6, 45.9, 54.3, 54.6, 71.8, 71.8, 127.5, 127.8, 128.7, 131.5, 136.9, 138.2, 173.1, 215.0. Anal. Calcd. for  $\text{C}_{27}\text{H}_{41}\text{NO}_4$ : C, 73.10; H, 9.32; N, 3.16. Found: C, 73.34; H, 9.12; N, 3.34.

**Entry 9.** IR: 3396, 2930, 2857, 1738, 1464, 1161  $\text{cm}^{-1}$ .  $^1\text{H}$  NMR (500 MHz)  $\delta$  0.88 (t, 3H, J = 6.8), 1.24 (t, 3H, J = 14.6), 1.23-1.38 (m, 11H), 1.42-1.63 (m, 6H), 1.97 (dt, 1H, J = 12.0, 6.0), 2.20 (dd, 1H, J = 18.5, 9.9), 2.26 (t, 2H, J = 7.5), 2.32 (dt, 1H, J = 12.1, 9.0), 2.70 (m, 2H), 3.66 (s, br, 1H), 4.02 (q, 1H, J = 8.8), 4.50 (q, 2H, J = 7.1), 5.54 (dd, 1H, J = 15.2, 8.9), 5.64 (dd, 1H, J = 15.2, 7.3).  $^{13}\text{C}$  NMR (100 MHz)  $\delta$  13.9, 14.2, 22.5, 24.8, 25.1, 26.5, 27.6, 28.8, 29.3, 31.6, 34.2, 37.2, 45.8, 54.4, 54.8, 60.2, 71.8, 73.0, 131.9, 136.7, 173.8, 214.6. Anal. Calcd. for  $\text{C}_{22}\text{H}_{38}\text{O}_5$ : C, 69.07; H, 10.01. Found: C, 69.37; H, 9.74.

**Entry 10.** IR: 3371, 2929.5, 2857, 1739, 1169.9  $\text{cm}^{-1}$ .  $^1\text{H}$  NMR (500 MHz)  $\delta$  0.88 (t, 3H, J = 6.7), 1.20-1.50 (m, 14H), 1.52-1.65 (m, 4H), 1.73 (dd, 1H, J = 14.8, 3.0), 1.88 (s, br, 1H), 2.16-2.21 (m, 2H), 2.29 (t, 2H, J = 7.5), 2.34 (s, br, 1H (OH)), 2.45 (s, br, 1H, OH), 3.20 (s, br, 1H (OH)), 3.66 (s, 3H), 3.92 (s, br 1H), 4.04 (q, 1H, J = 6.7), 4.16 (s, br, 1H), 4.55 (dd, 1H, J = 15.2, 8.9), 5.52 (dd, 1H, J = 15.2, 7.2).  $^{13}\text{C}$  NMR (125 MHz)  $\delta$  14.0, 22.6, 24.8, 25.2, 27.6, 27.7, 29.0, 29.5, 31.7, 34.0, 37.2, 42.9, 50.1, 51.5, 56.2, 73.0, 73.2, 78.0, 133.2, 135.0, 174.4. HRMS (FAB, m-nitrobenzyl alcohol + LiCl) calcd. for  $\text{C}_{21}\text{H}_{38}\text{O}_5\text{Li}$  (M+Li) 377.287929, found 377.287210.

**Entry 11.** IR: 3363, 2431, 2857, 1733, 1467, 1109  $\text{cm}^{-1}$ .  $^1\text{H}$  NMR (500 MHz)  $\delta$  0.88 (t, 3H, J = 6.9), 1.20 (d, 6H, J = 6.2), 1.23-1.34 (m, 11H), 1.34-1.5 (m, 4H), 1.5-1.64 (m, 4H), 1.72 (dd, 1H, J = 14.9, 3.3), 2.17-2.25 (m, 2H), 2.24 (t, 2H, J = 7.5), 3.87-3.92 (m, 1H), 4.03 (q, 1H, J = 6.8), 4.15 (m, 1H), 4.98 (septet, 1H, J = 6.3), 5.44 (dd, 1H, J = 15.2, 9.0), 5.51 (dd, 1H, J = 15.2, 7.4).  $^{13}\text{C}$  NMR (125 MHz)  $\delta$  14.0, 21.8, 22.6, 24.8, 25.2, 27.6, 27.8, 28.9, 29.5, 31.7, 34.6, 37.2, 42.9, 50.1, 56.2, 67.4, 73.0, 73.2, 78.1, 133.2, 135.0, 173.5. HRMS (FAB, m-nitrobenzyl alcohol + LiCl) calcd. for  $\text{C}_{23}\text{H}_{42}\text{O}_5\text{Li}$  (M+Li) 405.319229, found 405.319650.



entry 1

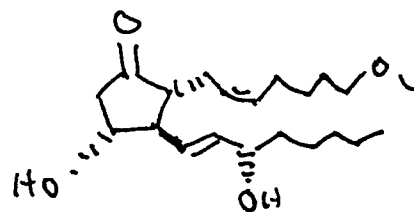

VI - 83

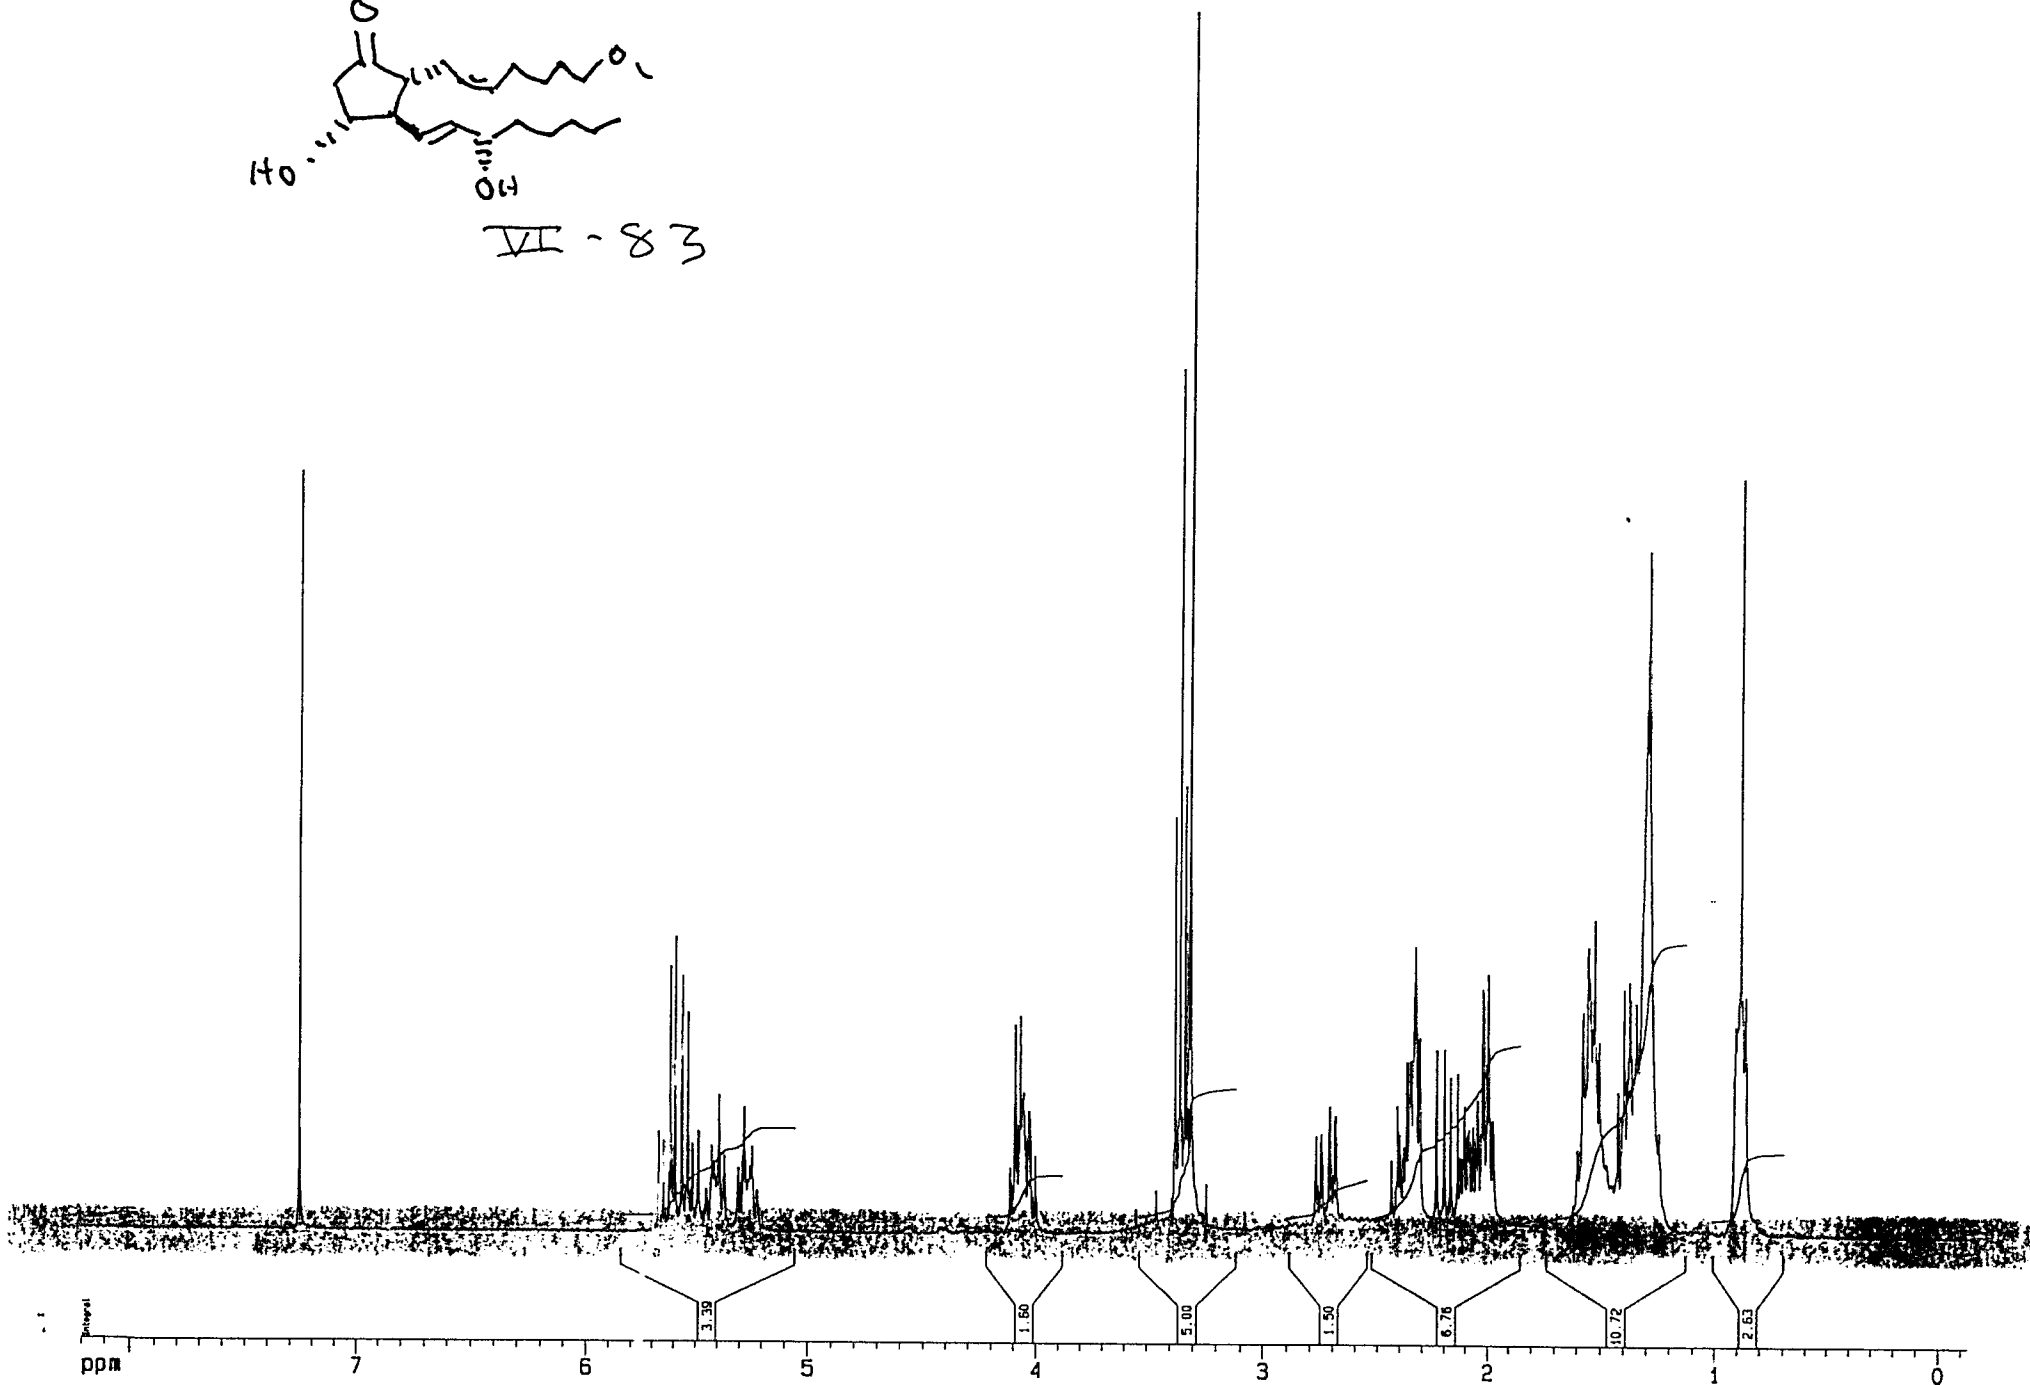

CARBON STARTING PARAMETERS, GNP PROBE. 12/7/88 RN.

PPM  
214.150

136.880  
131.905  
131.442  
125.606

77.315  
76.596  
76.580  
72.983  
72.686  
72.005

58.483  
54.606  
53.665

46.118

37.321

31.699  
29.232  
27.088  
26.039  
25.151  
24.980  
22.601

13.995

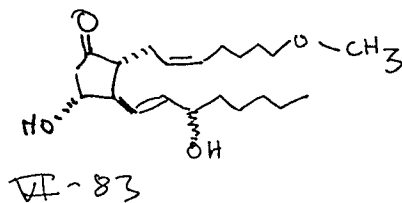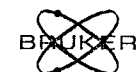

ONG400.002  
AU PROG:  
POWDATE.AU  
DATE 23-11-96  
TIME 17:54

SA.NA SEP27  
SA.NO C115 131  
SFO 100.602  
O1 22989.929  
SI 65536  
TD 65536  
SW 25000.000  
HZ/PT .763

PW 0.0  
RD 0.0  
AQ 1.311  
RG 8192  
NS 2207

O2 5859.947  
DP 17H CPD

LB .750  
F1 220.005P  
F2 -3.985P  
HZ/CM 704.265  
PPM/CM 7.000  
SR 11872.76

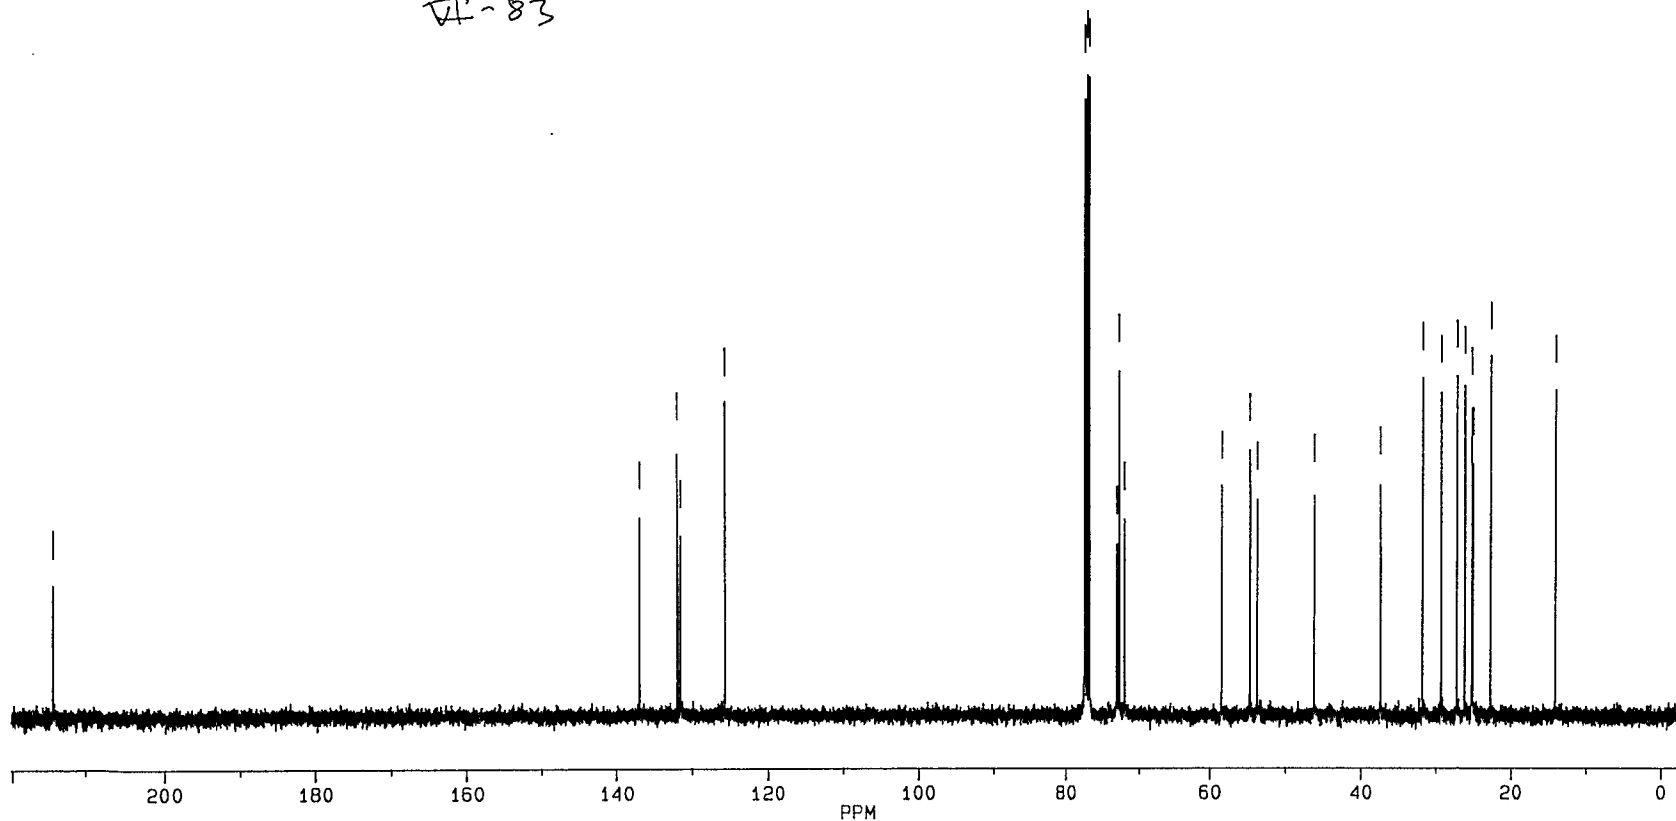

1H 5mm BBO PROBE 5/8/97 RN

compd 14a(entry 2)

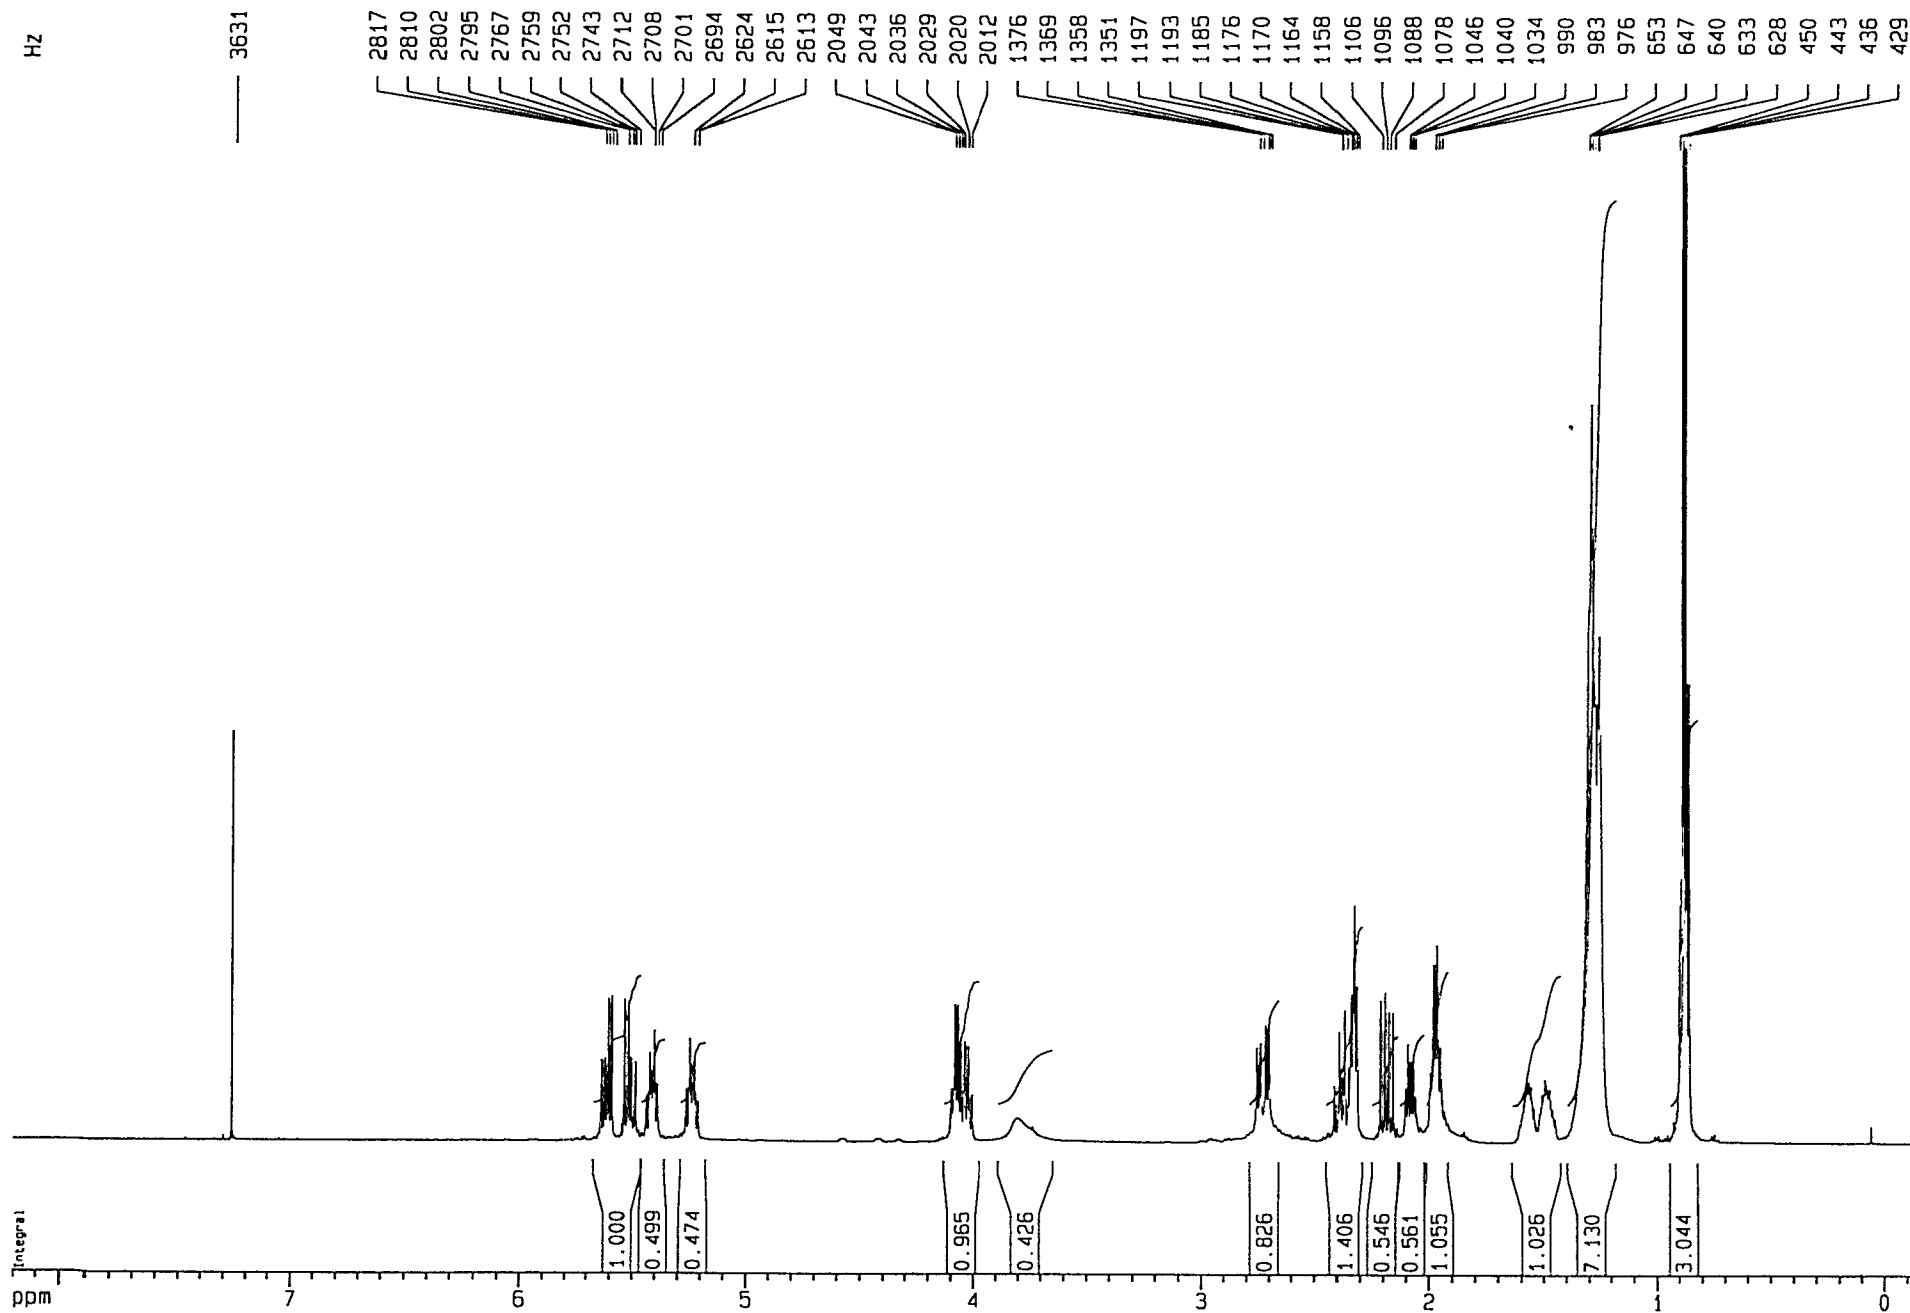

<sup>13</sup>C 5mm BB PROBE 5/9/97 RN

ppm

—214.21

—136.77  
—132.44  
—132.12  
—125.05

77.25  
77.00  
76.75  
73.26  
71.87

54.71  
53.82  
46.07  
37.32  
31.77  
31.70  
29.53  
29.03  
27.36  
25.15  
24.88  
22.62  
22.61  
14.07  
14.00

comp 14a (entry 2)

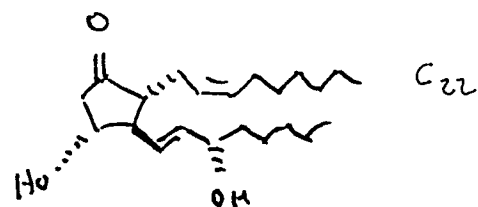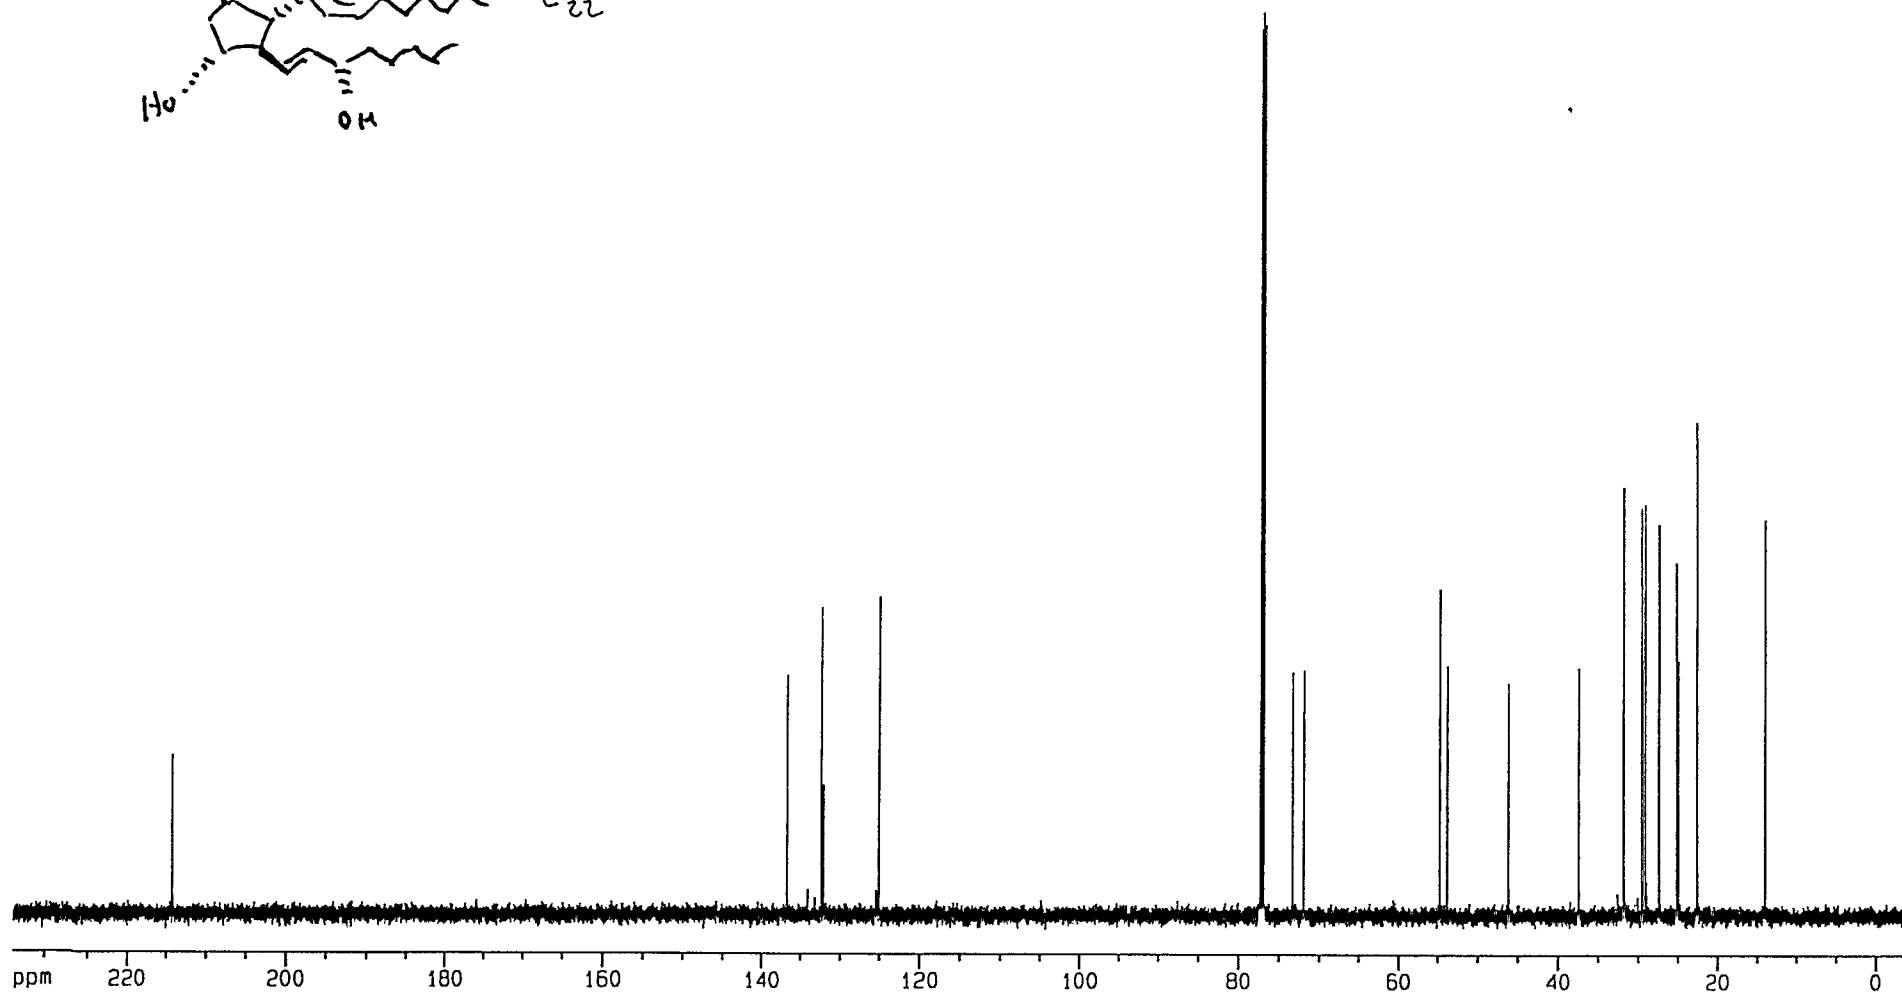

(entry 3)

Current Data Parameters  
NAME dimeth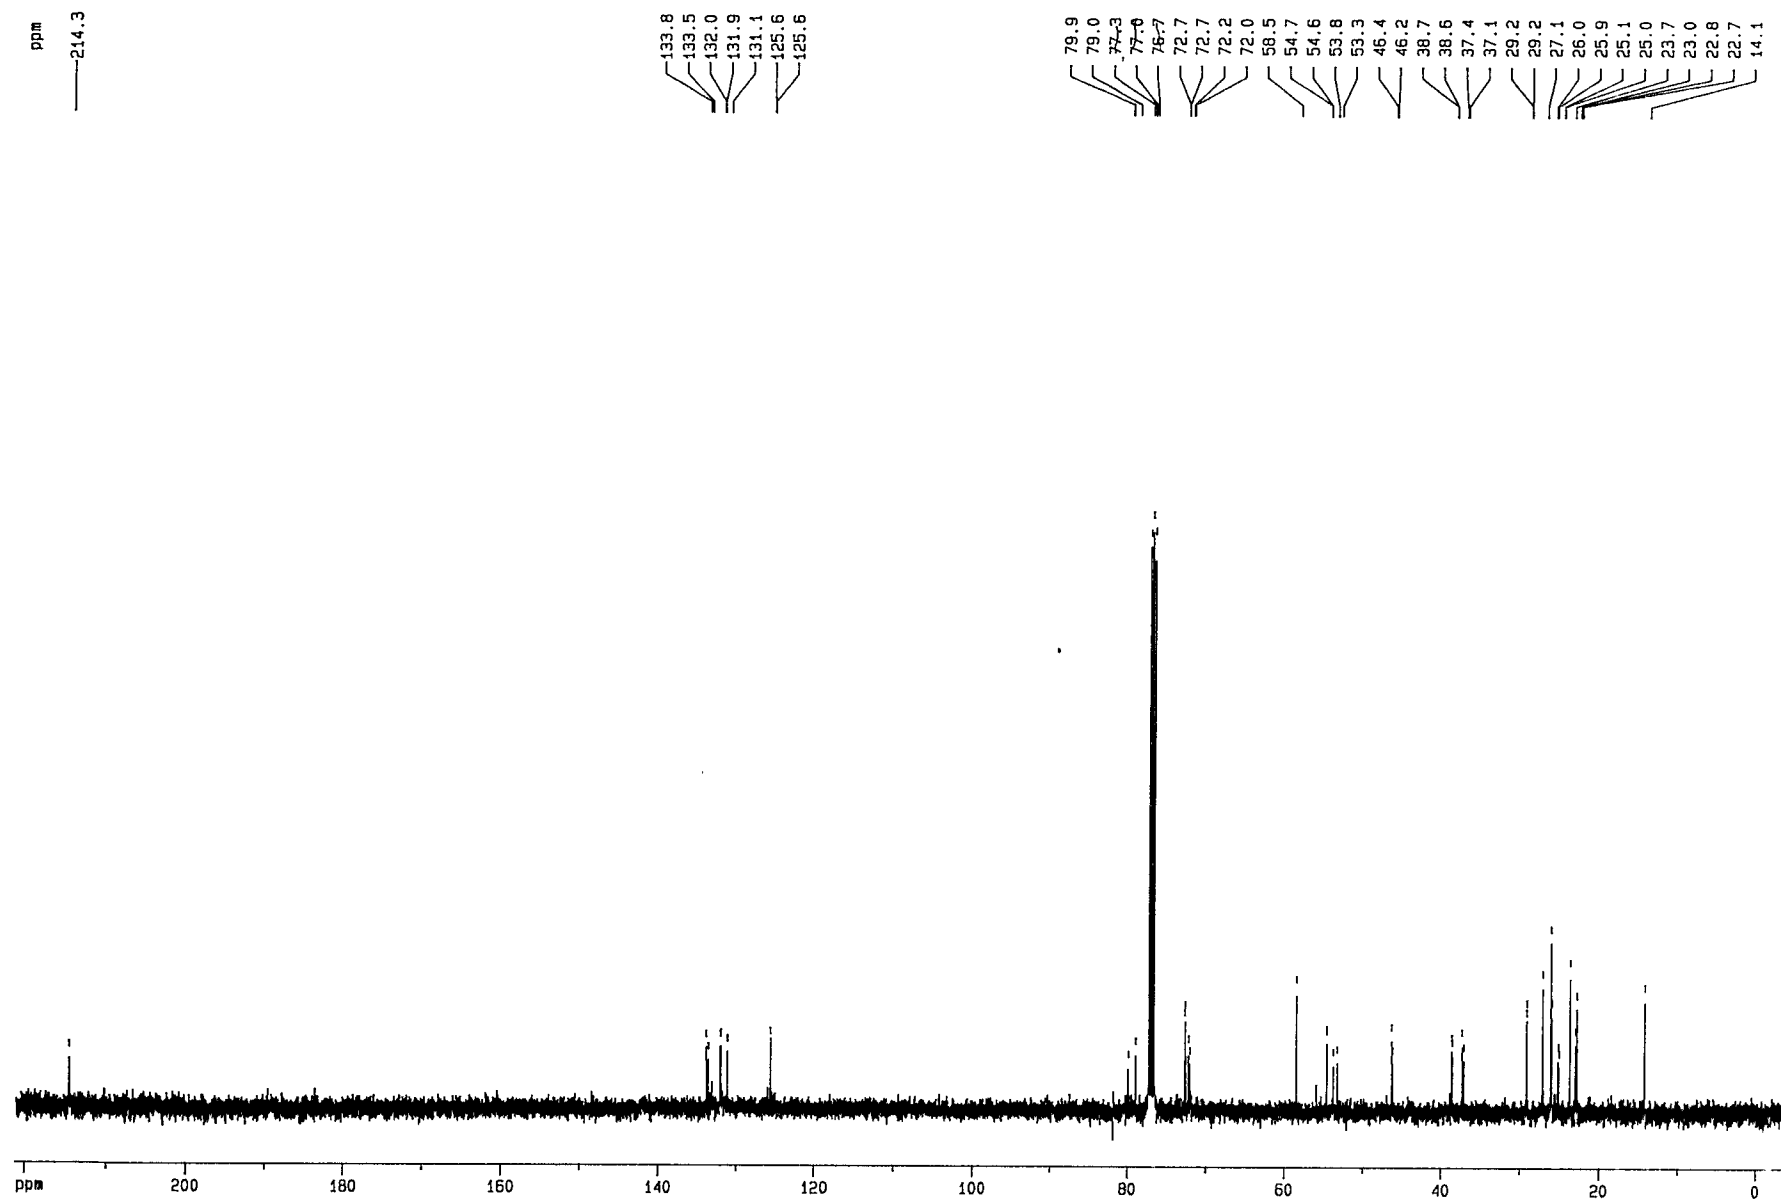

(entry 3)

Proton Starting parameters, 11/29/94 RN

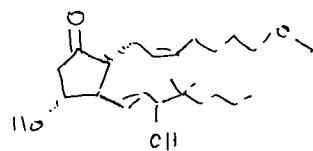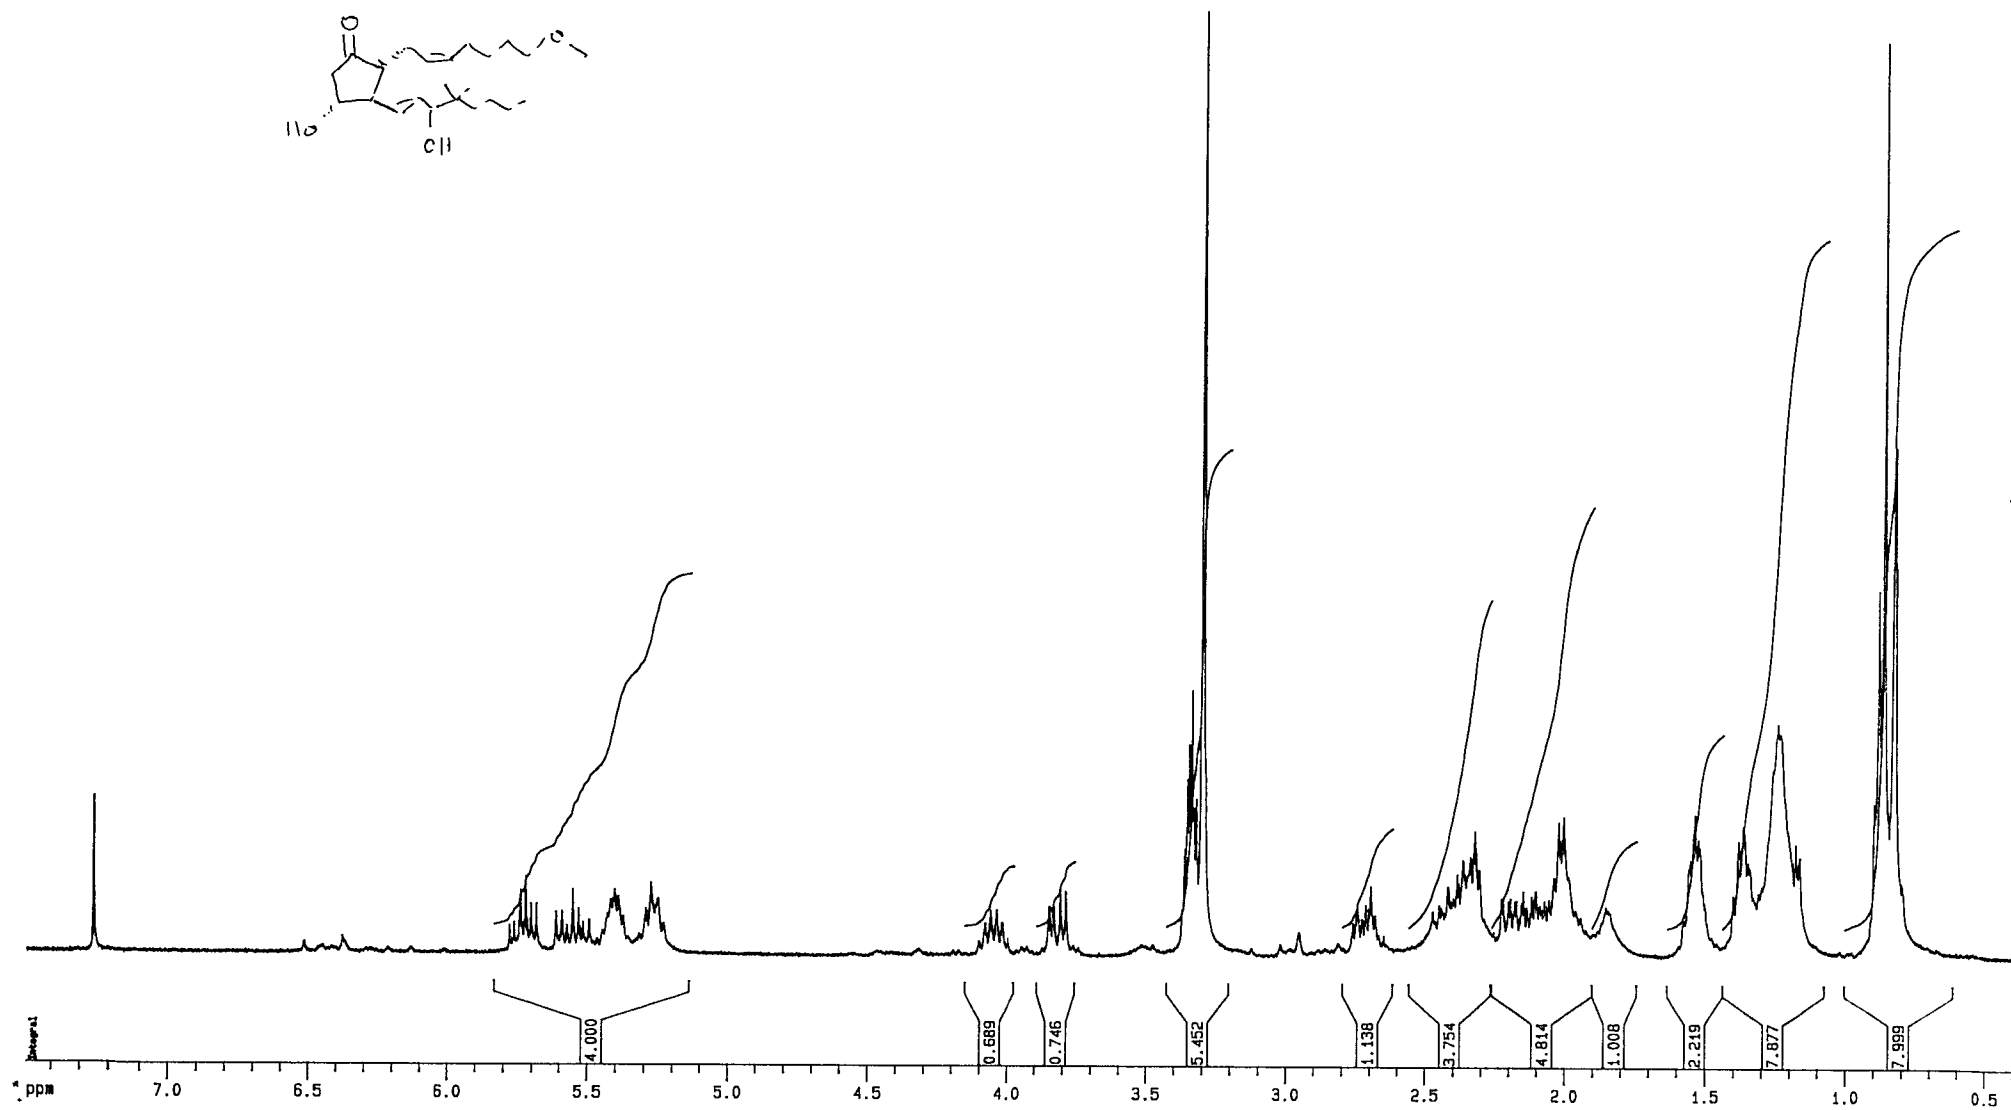

entry 4

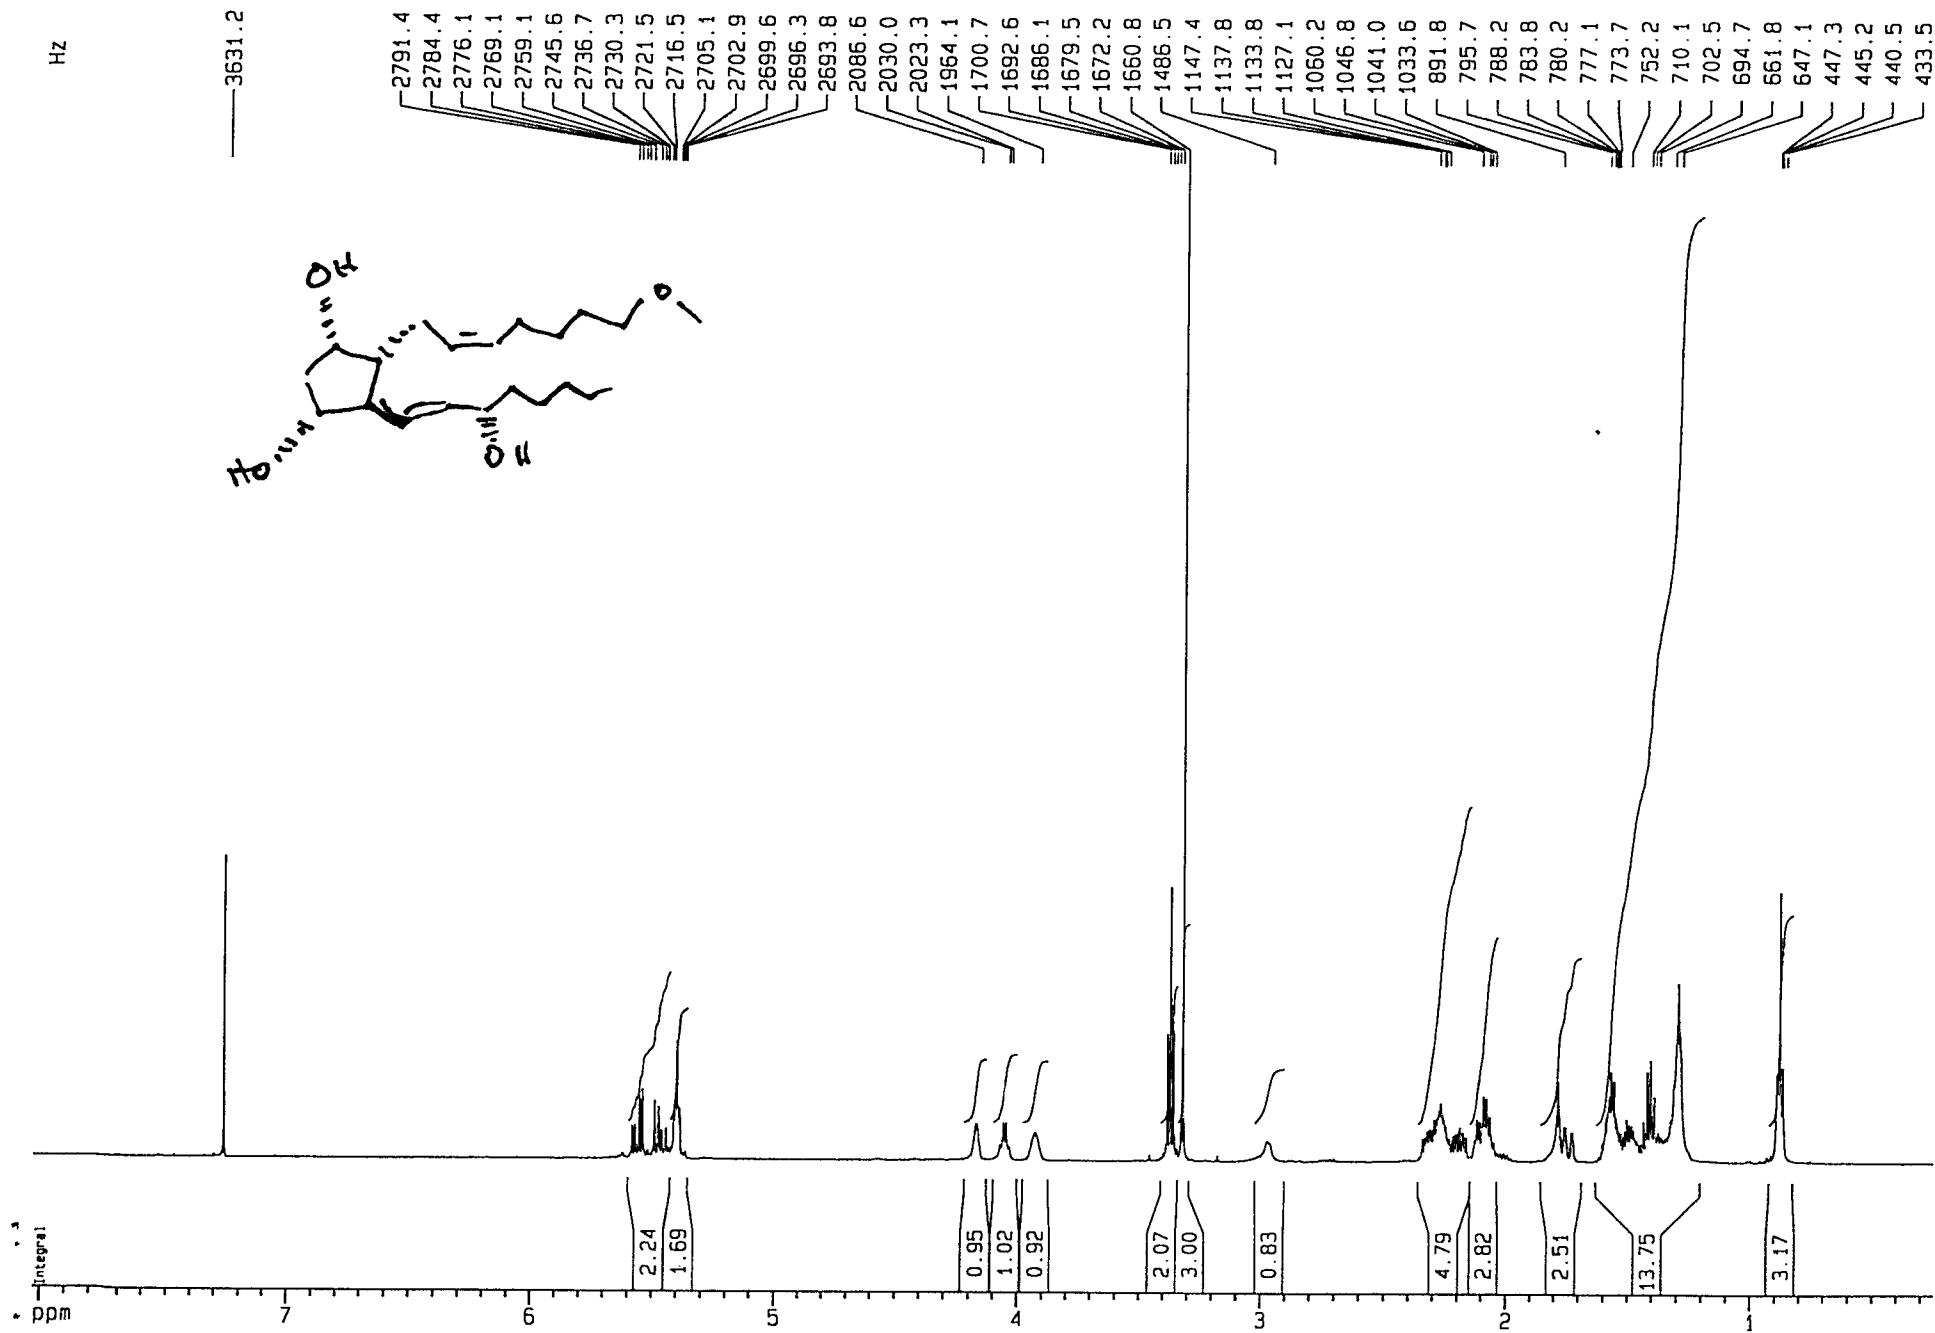

CARBONSTEAMINGBARAREMERSQNBPNRBBBE1212/88BRNN.

The diagram shows a complex chemical structure, possibly a steroid or a similar molecule. It features a central ring system with several substituents. Labels include 'H<sub>2</sub>O' at the top, 'H<sub>2</sub>O' on the left, 'OH' at the bottom, and 'CH<sub>3</sub>' on the right. There are also wavy lines representing bonds or chains, and a small 'O' atom is visible near the top right.

135.394  
132.859  
130.636  
128.165

77.738  
77.321  
77.003  
76.686  
73.127  
72.697  
72.651

58,466  
55,661

50.098

42,765

|        |
|--------|
| 37,174 |
| 31,720 |
| 29,105 |
| 26,991 |
| 26,137 |
| 25,473 |
| 25,201 |
| 23,830 |
| 22,592 |
| 20,305 |
| 18,650 |
| 14,001 |
| 13,714 |
| 13,530 |



LJBTNP.112  
AU PROG:  
POWGATE.AU  
DATE 2-10-96  
TIME 11:56

SA.NA SEP27  
SA.NO C115 137  
SF0 161.972  
01 6222.372  
SI 65536  
TD 65536  
SW 31250.000  
HZ/PT .954

|    |       |
|----|-------|
| PW | 0.0   |
| RD | 0.0   |
| AG | 1.049 |
| RG | 1024  |
| NS | 44    |

02 5900.000  
DP 17H CPD

```

LB      0.0
F1     137.905P
F2     -1.234P
HZ/CM  704.288
PPM/CM  4.348
SR    12417.94

```

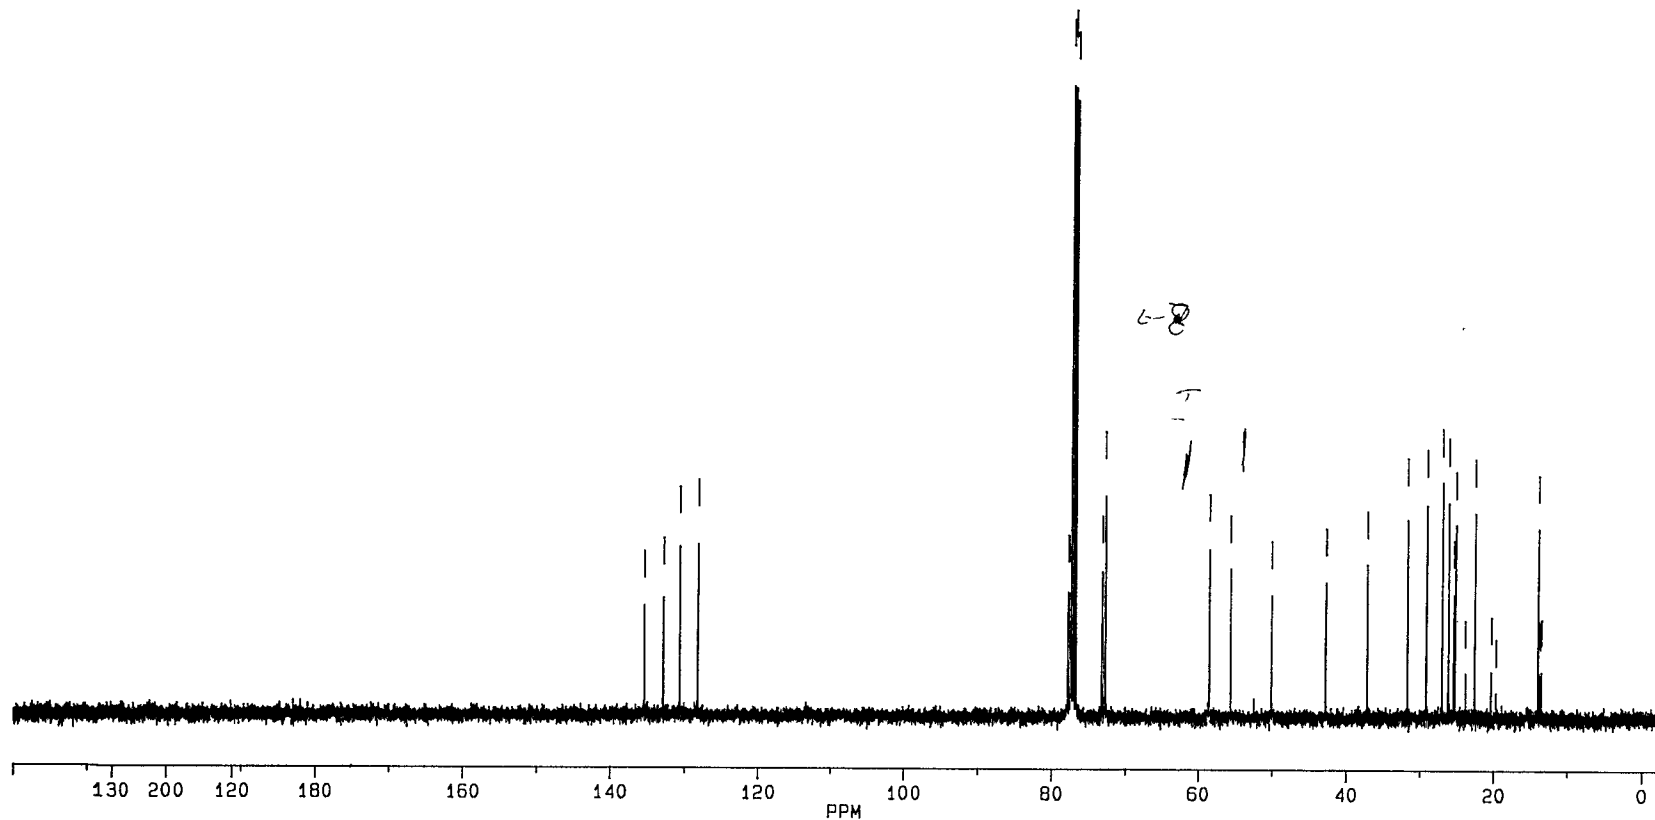



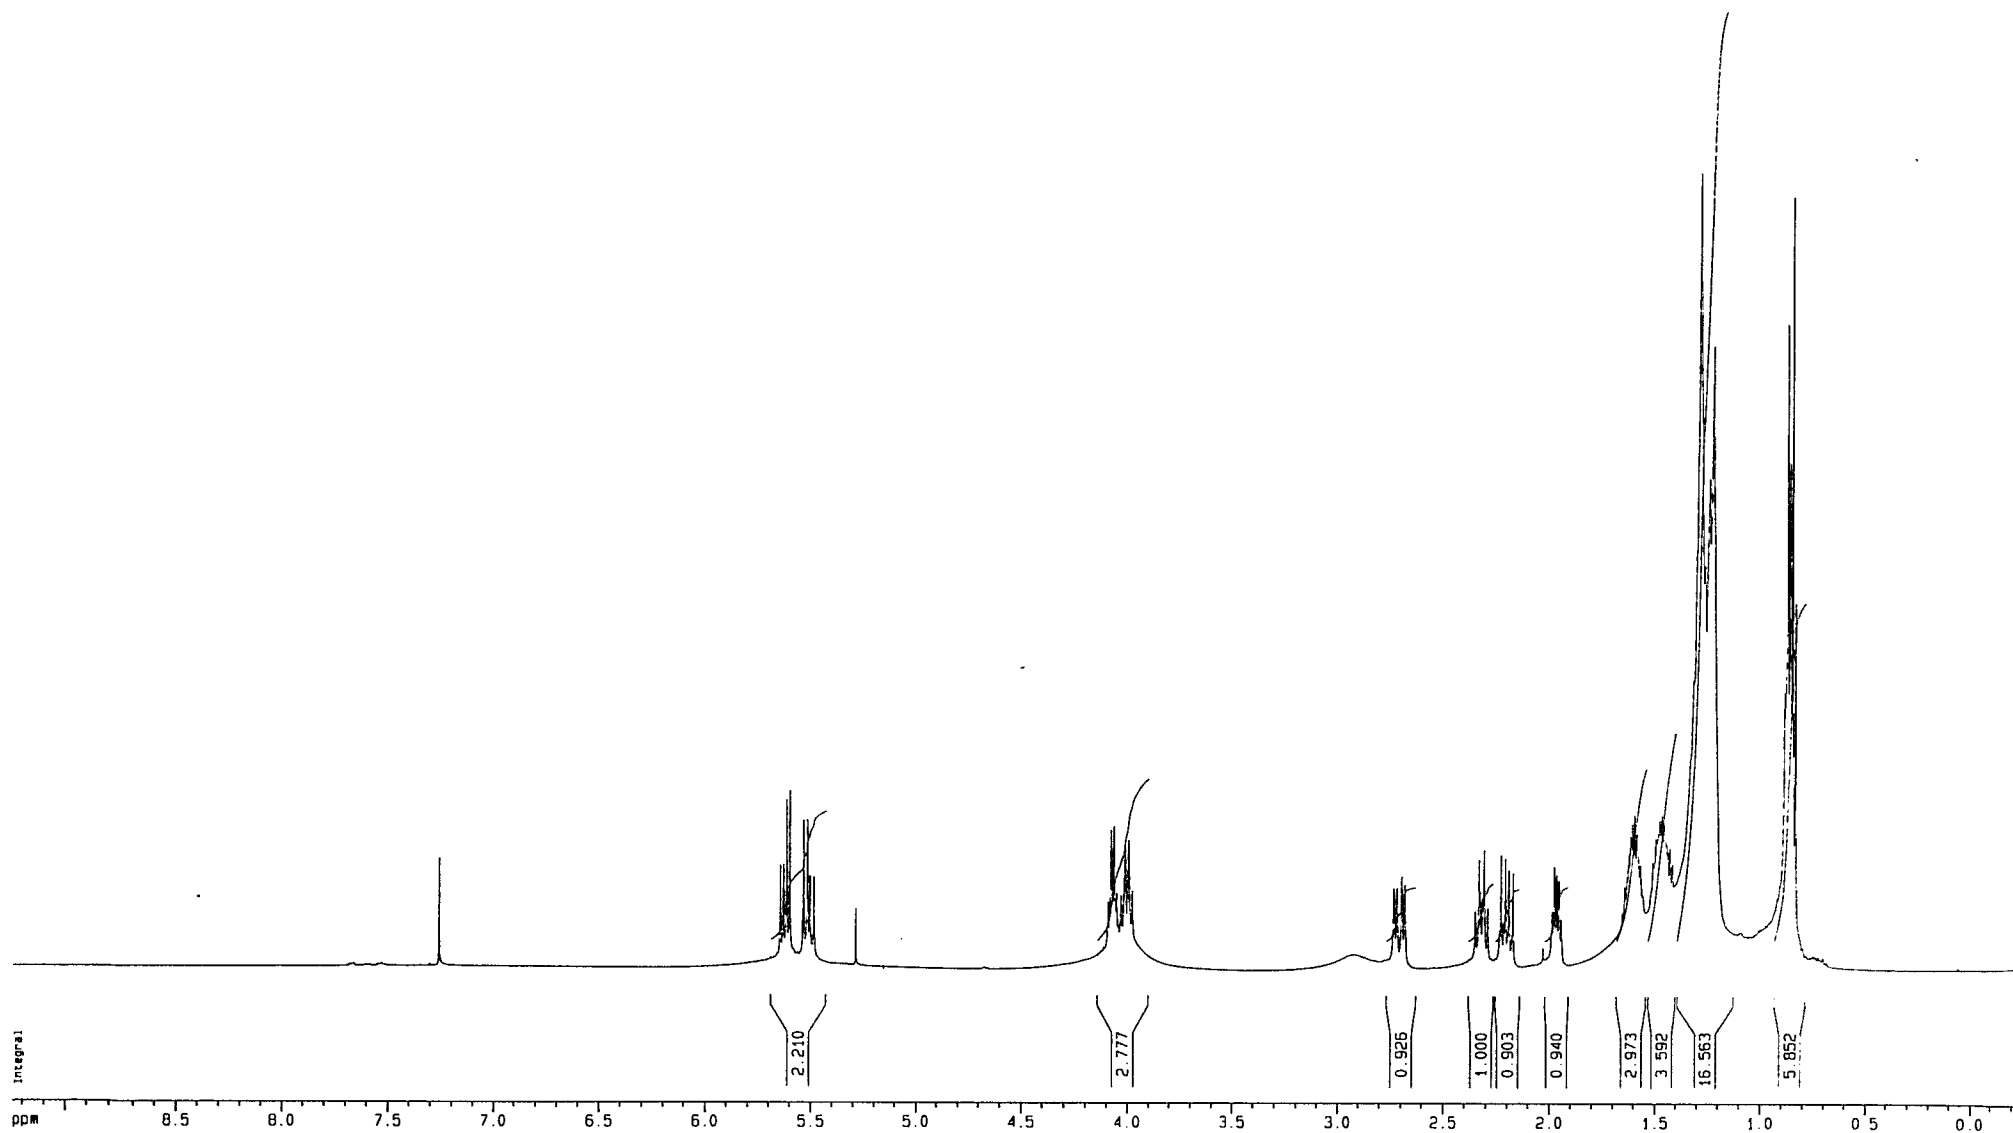

entry 5

Current Data Parameters  
 NAME PGE  
 EXPNO 1  
 PROCNO 1

## F2 - Acquisition Parameters

Date 970312  
 Time 13.51  
 INSTRUM am500  
 PROBHD  
 PULPROG POWGATE\_AU  
 TD 65536  
 SOLVENT unknown  
 NS 1440  
 DS 0  
 SWH 29411.766 Hz  
 FIDRES 0.448788 Hz  
 AQ 1.1141620 sec  
 RG 8192  
 DW 17.000 usec  
 DE 23.80 usec  
 TE 297.0 K  
 D1 1.00000000 sec  
 D2 0.00370000 sec  
 P1 7.80 usec  
 DE 23.80 usec  
 SF01 125.7730000 MHz  
 NUCLEUS unknown

## F2 - Processing parameters

SI 32768  
 SF 125.7591518 MHz  
 MDW EM  
 SSB 0  
 LB 1.00 Hz  
 GB 0  
 PC 1.50

## 1D NMR plot parameters

CX 38.00 cm  
 F1P 226.961 ppm  
 F1 28542.42 Hz  
 F2P -6.913 ppm  
 F2 -869.34 Hz  
 PPMCM 6.15457 ppm/cm  
 HZCM 773.99384 Hz/cm

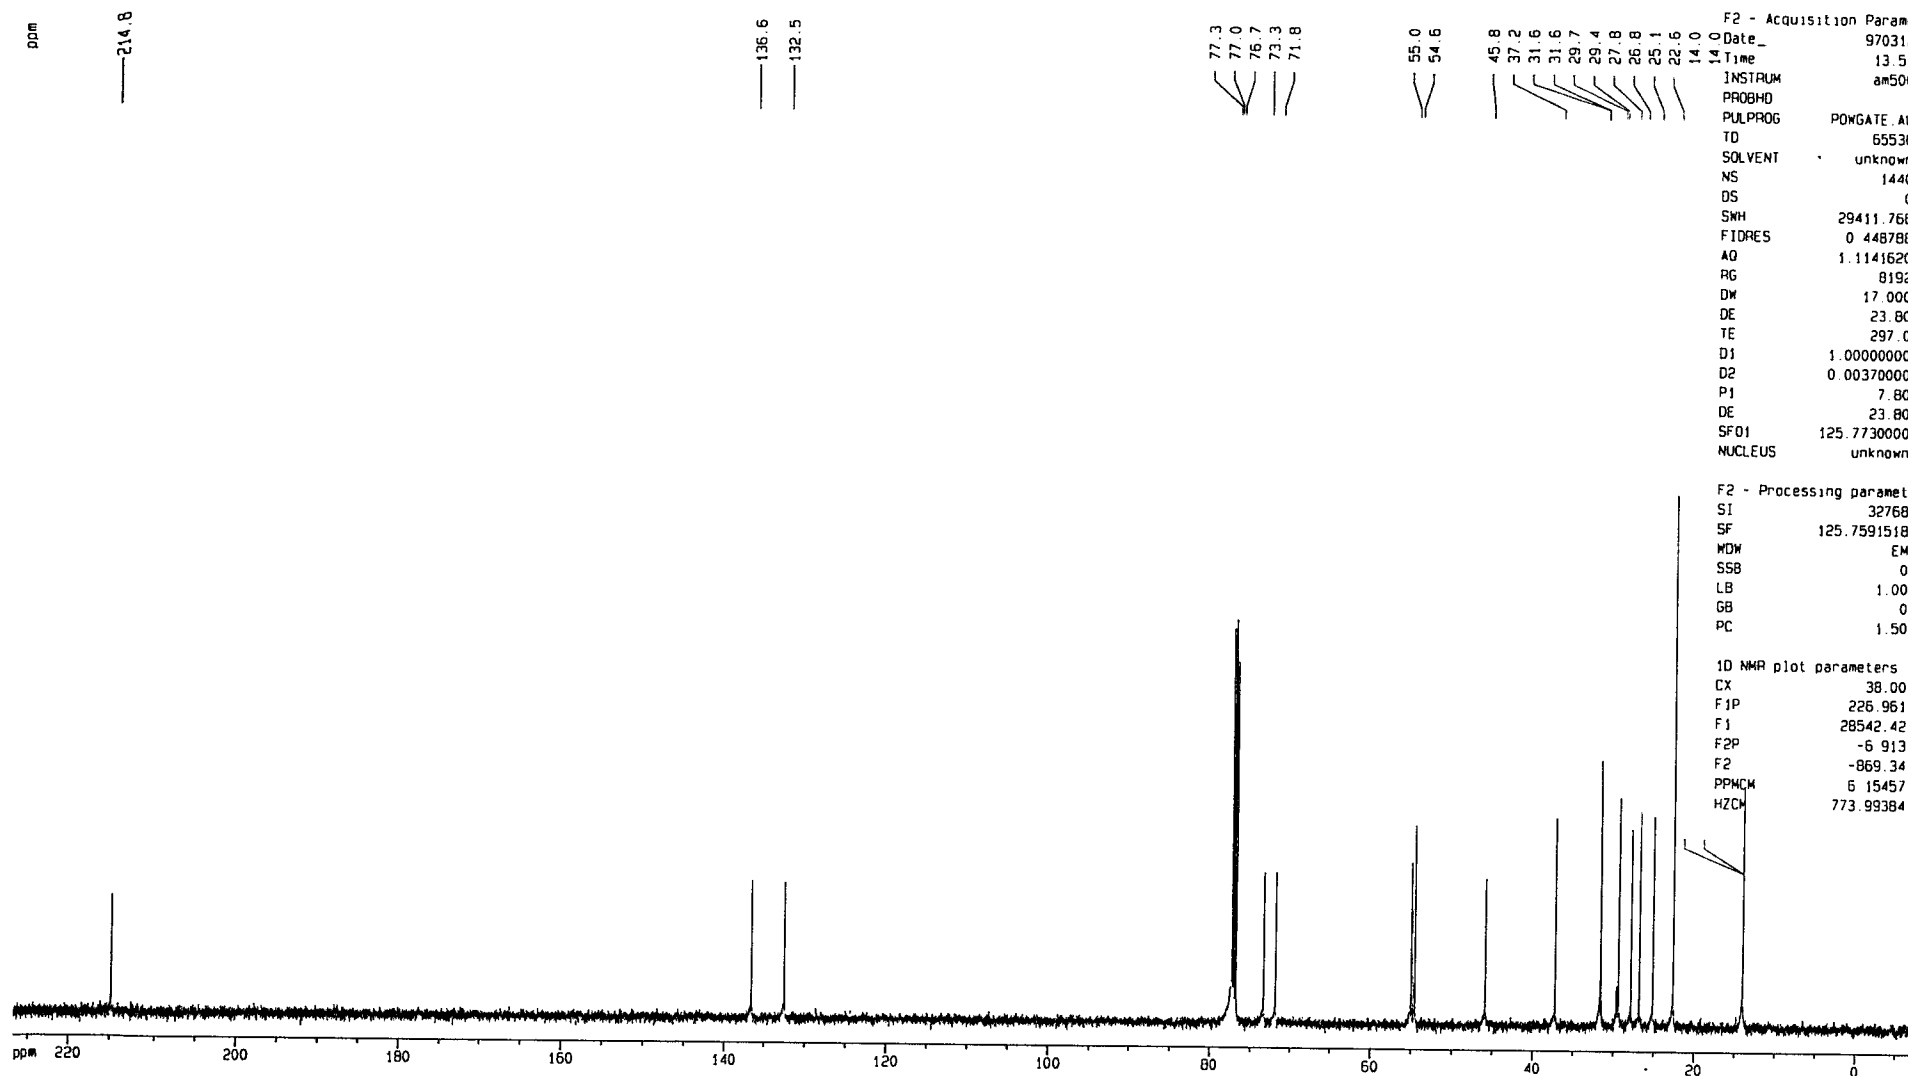

(entry 6)

6.4

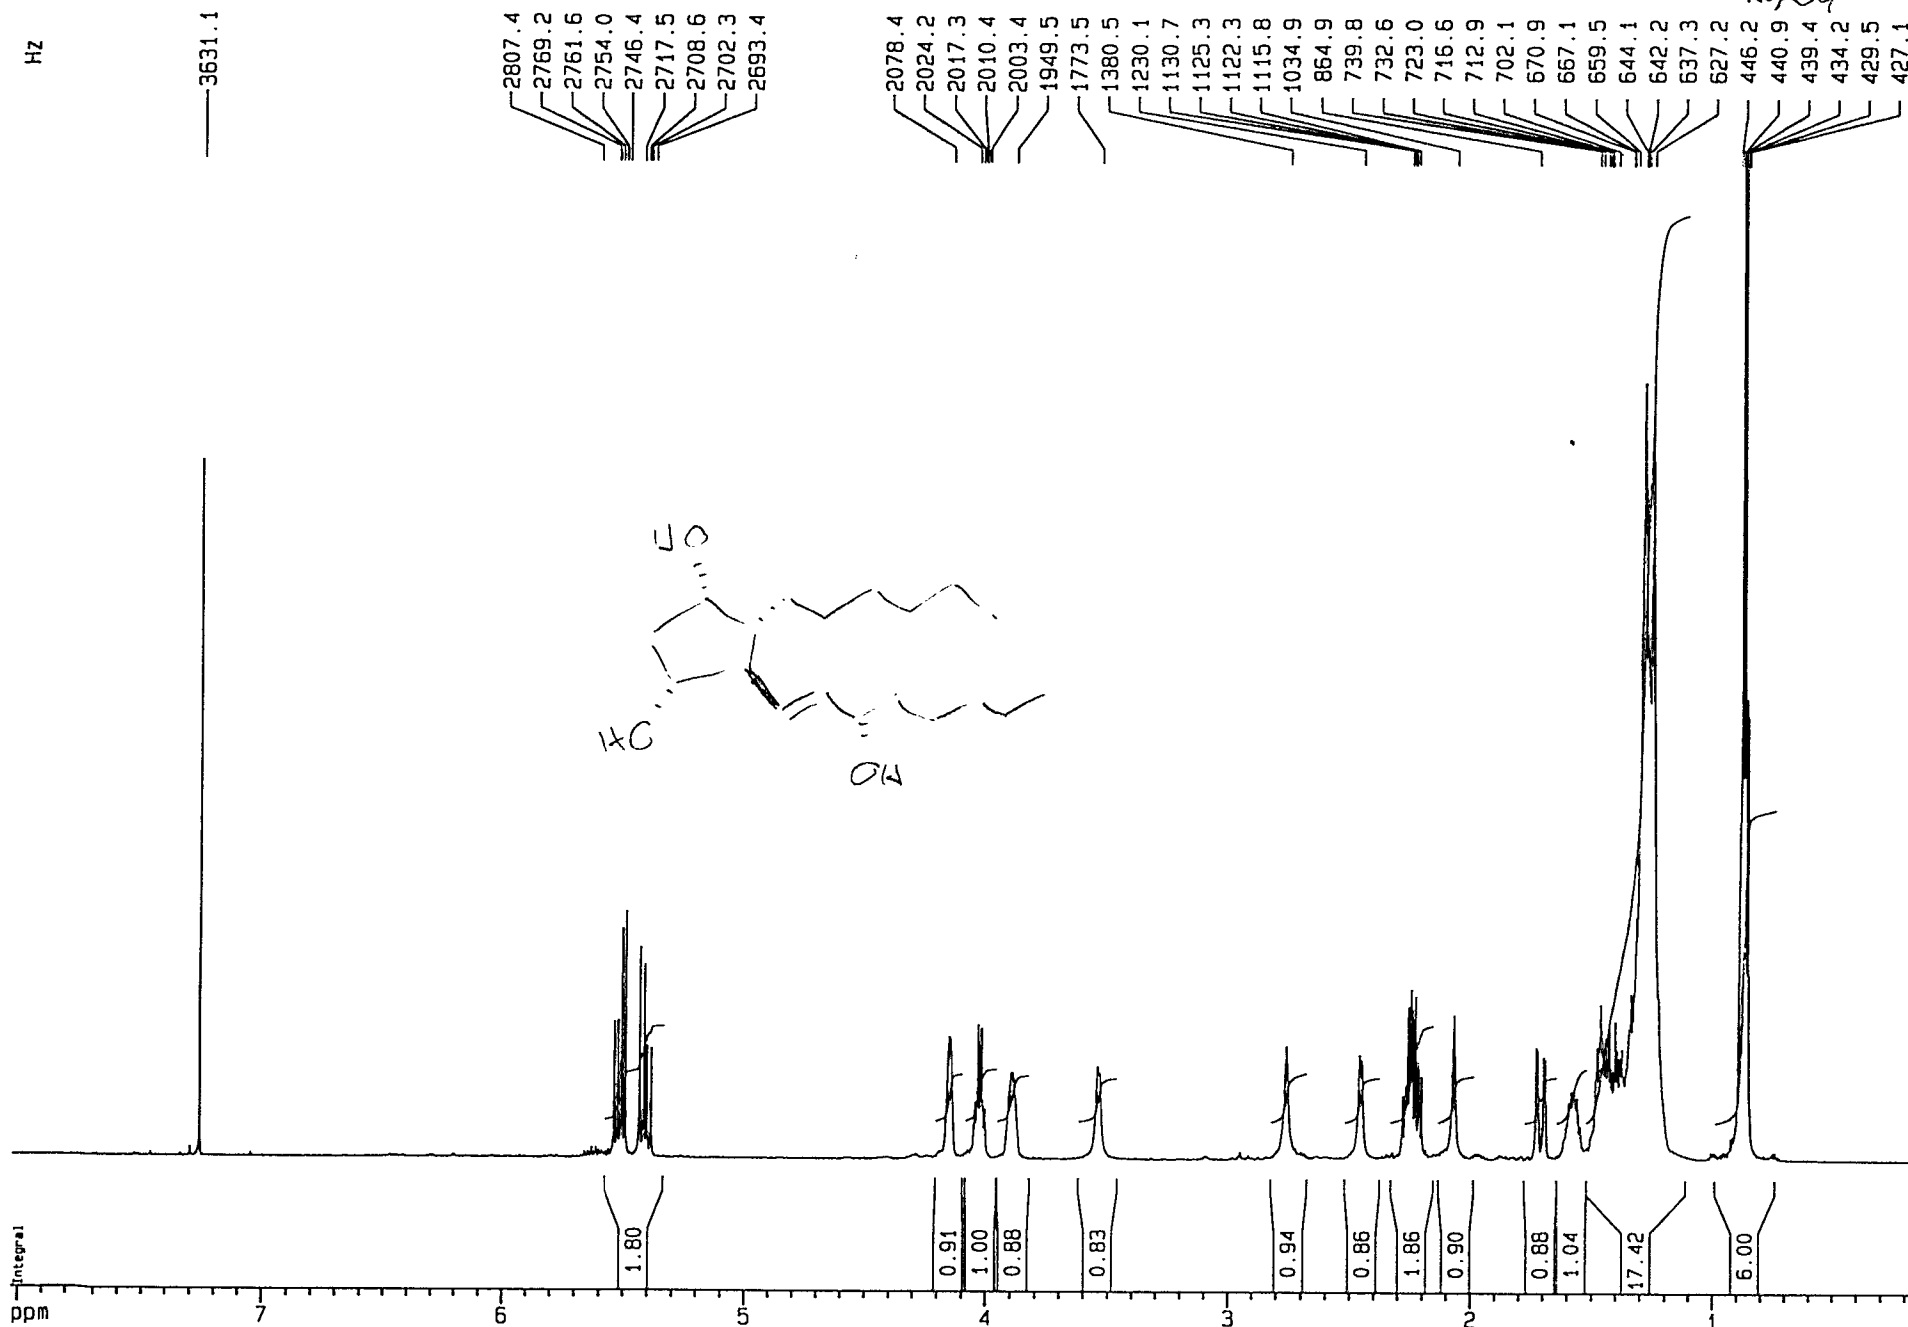

entry 6

CARBON STARTING PARAMETERS. QNP PROBE 12/7/88 IN.

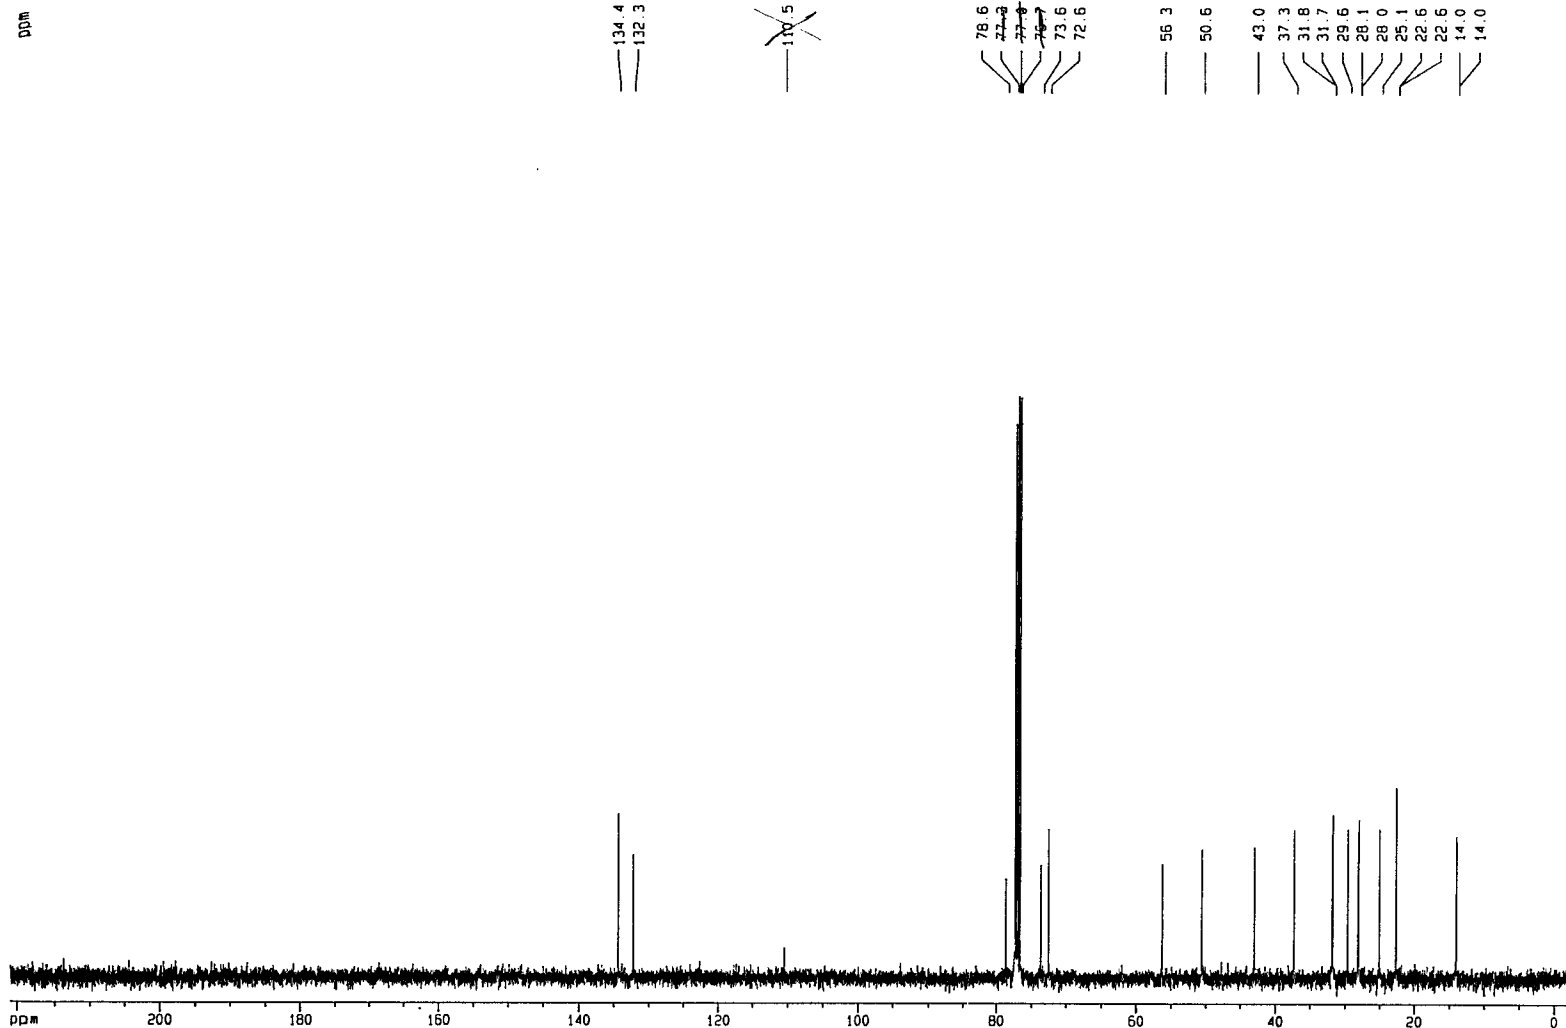

Data Set

|        |       |
|--------|-------|
| NAME   | PGFC6 |
| EXPNO  | 1     |
| PROCNO | 1     |
| USER   | drew  |

F2 - Acquisition Parameters

|         |                 |
|---------|-----------------|
| Date_   | 970527          |
| Time    | 10.15           |
| INSTRUM | am400           |
| PROBHD  |                 |
| PULPROG | PONGATE .AU     |
| TD      | 65536           |
| SOLVENT | unknown         |
| NS      | 1135            |
| DS      | 0               |
| SMH     | 25000.000 Hz    |
| AQ      | 1.3107700 sec   |
| RG      | 1               |
| TE      | 297.0 K         |
| D1      | 0.10000000 sec  |
| D2      | 0.00356000 sec  |
| P1      | 12.00 usec      |
| SFO1    | 100.6249899 MHz |

F2 - Processing parameters

|     |                 |
|-----|-----------------|
| SI  | 32768           |
| SF  | 100.6138728 MHz |
| WDW | EM              |
| SSB | 0               |
| LB  | 0.75 Hz         |
| GB  | 0               |
| PC  | 1.50            |

1D NMR plot parameters

|       |                 |
|-------|-----------------|
| CX    | 32.14 cm        |
| F1P   | 221.000 ppm     |
| F1    | 22235.67 Hz     |
| F2P   | -4.000 ppm      |
| F2    | -402.46 Hz      |
| PPMCM | 7.00000 ppm/cm  |
| HZCM  | 704.29718 Hz/cm |

13C 5mm BB PROBE 5/9/97 RN

cmpd 18a (entry 7)

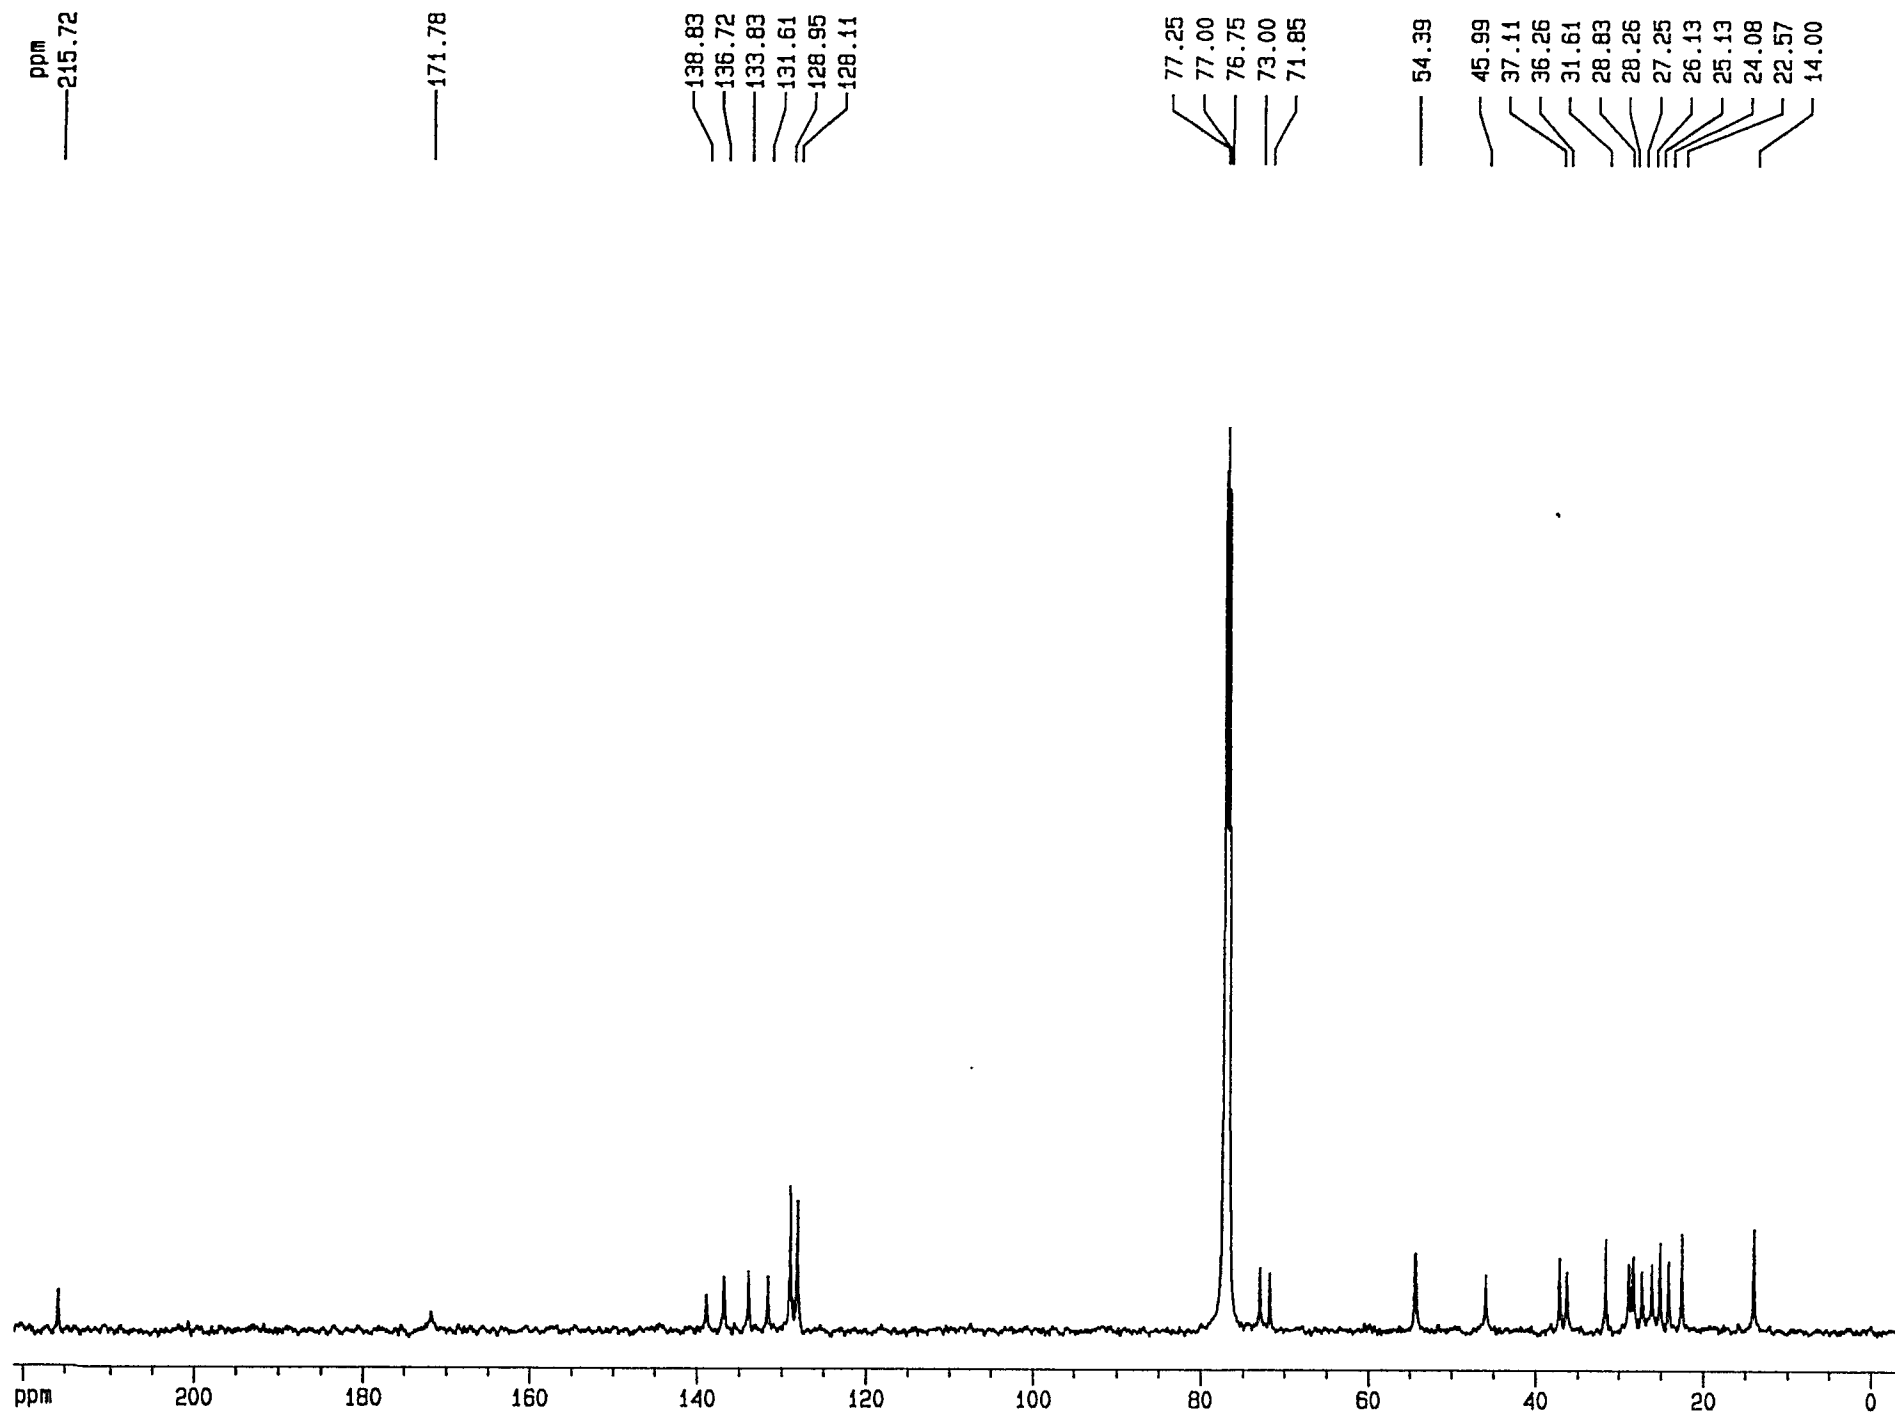

compd 18a (entry 7)

ppm

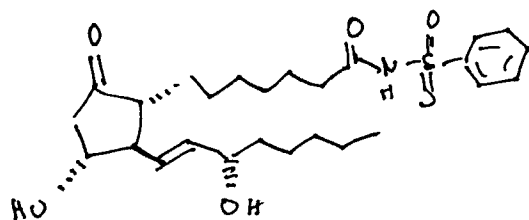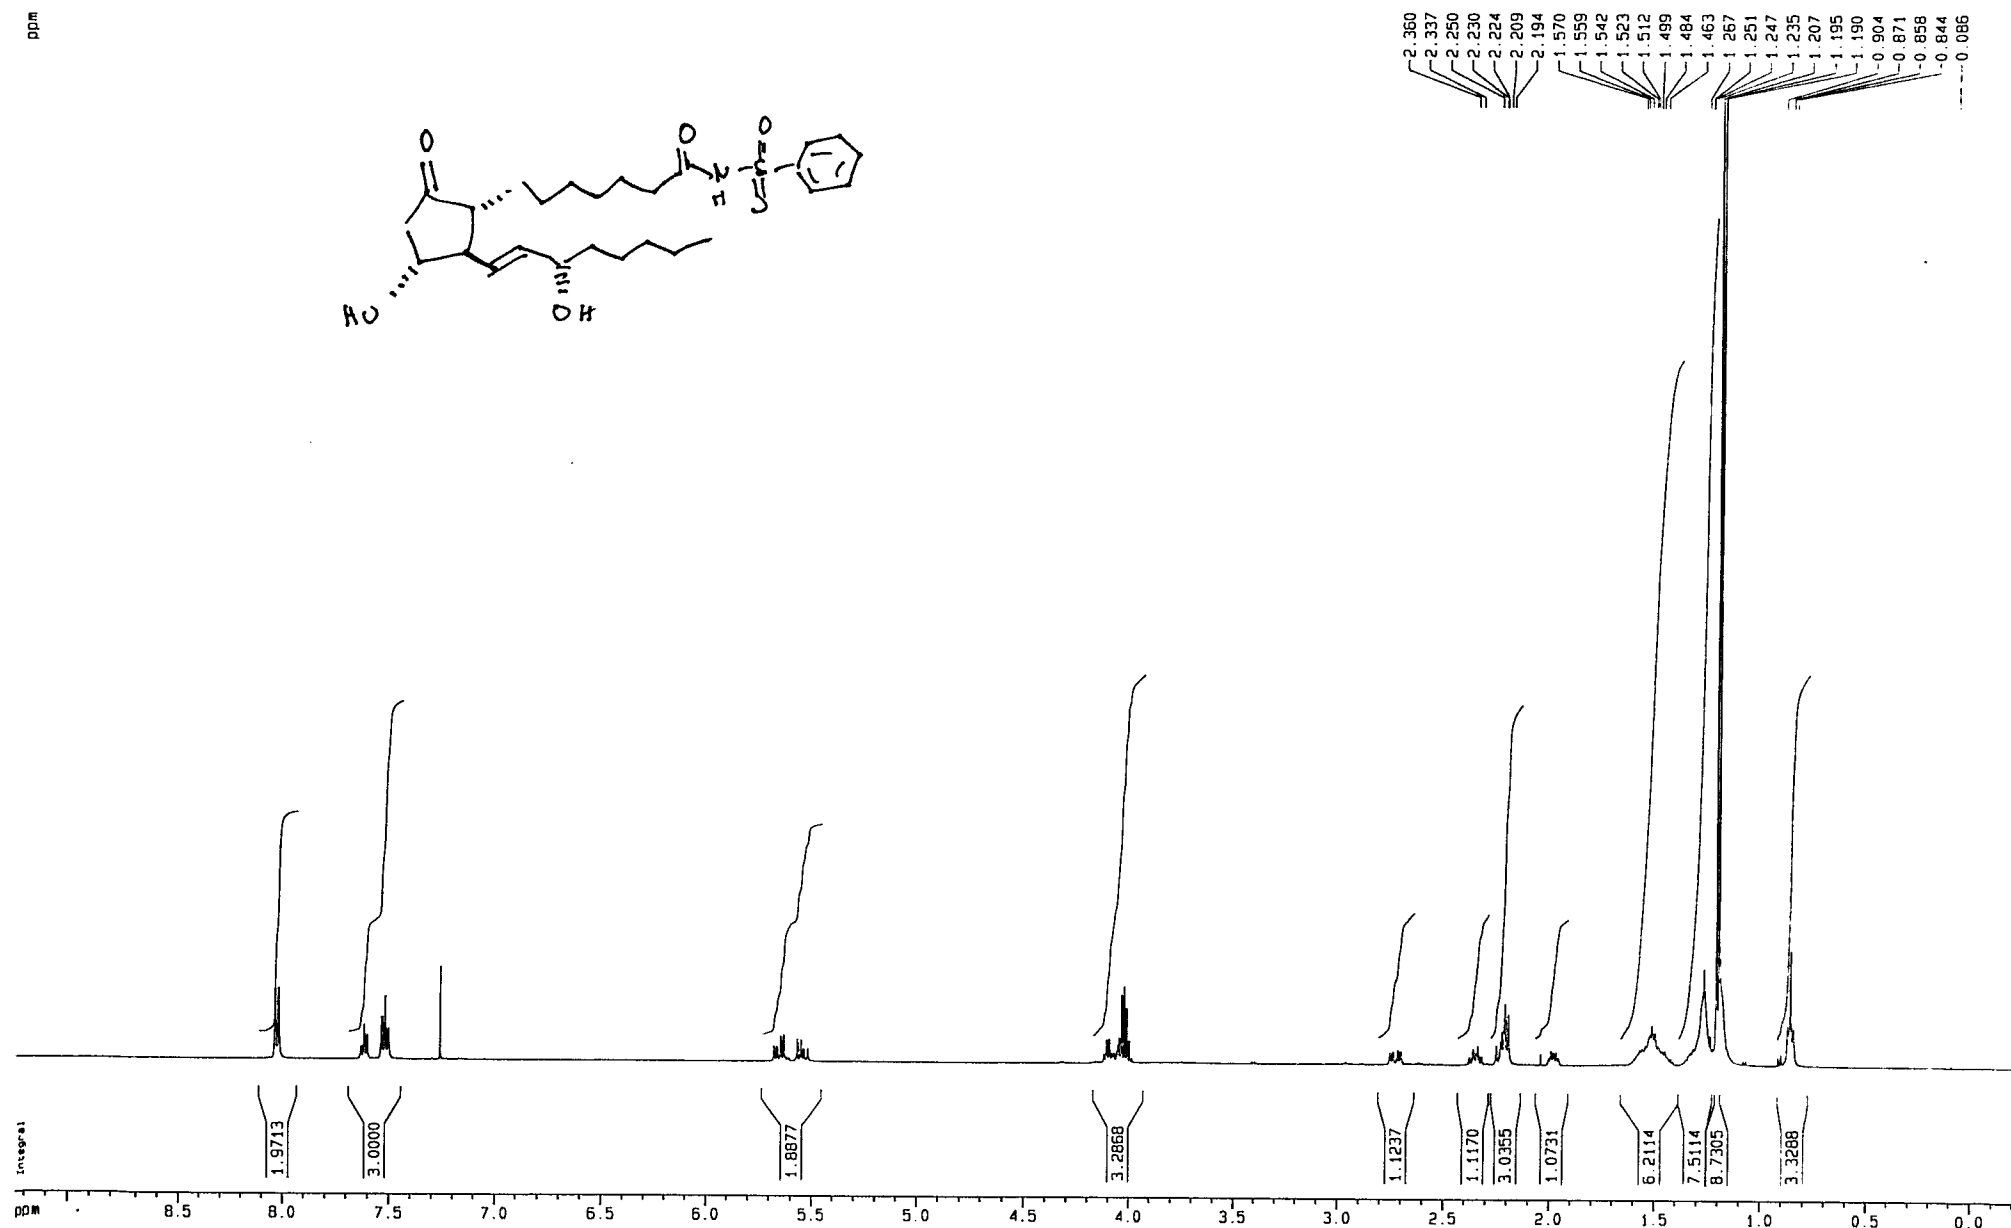

entry 8

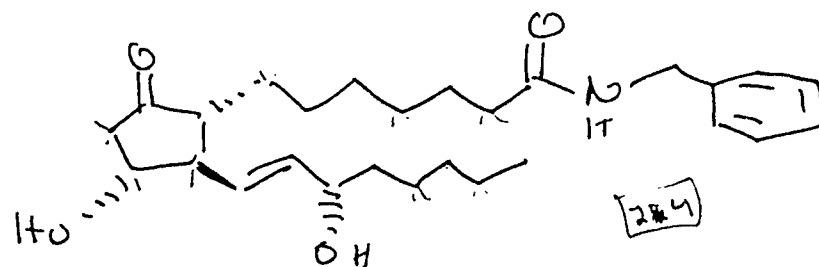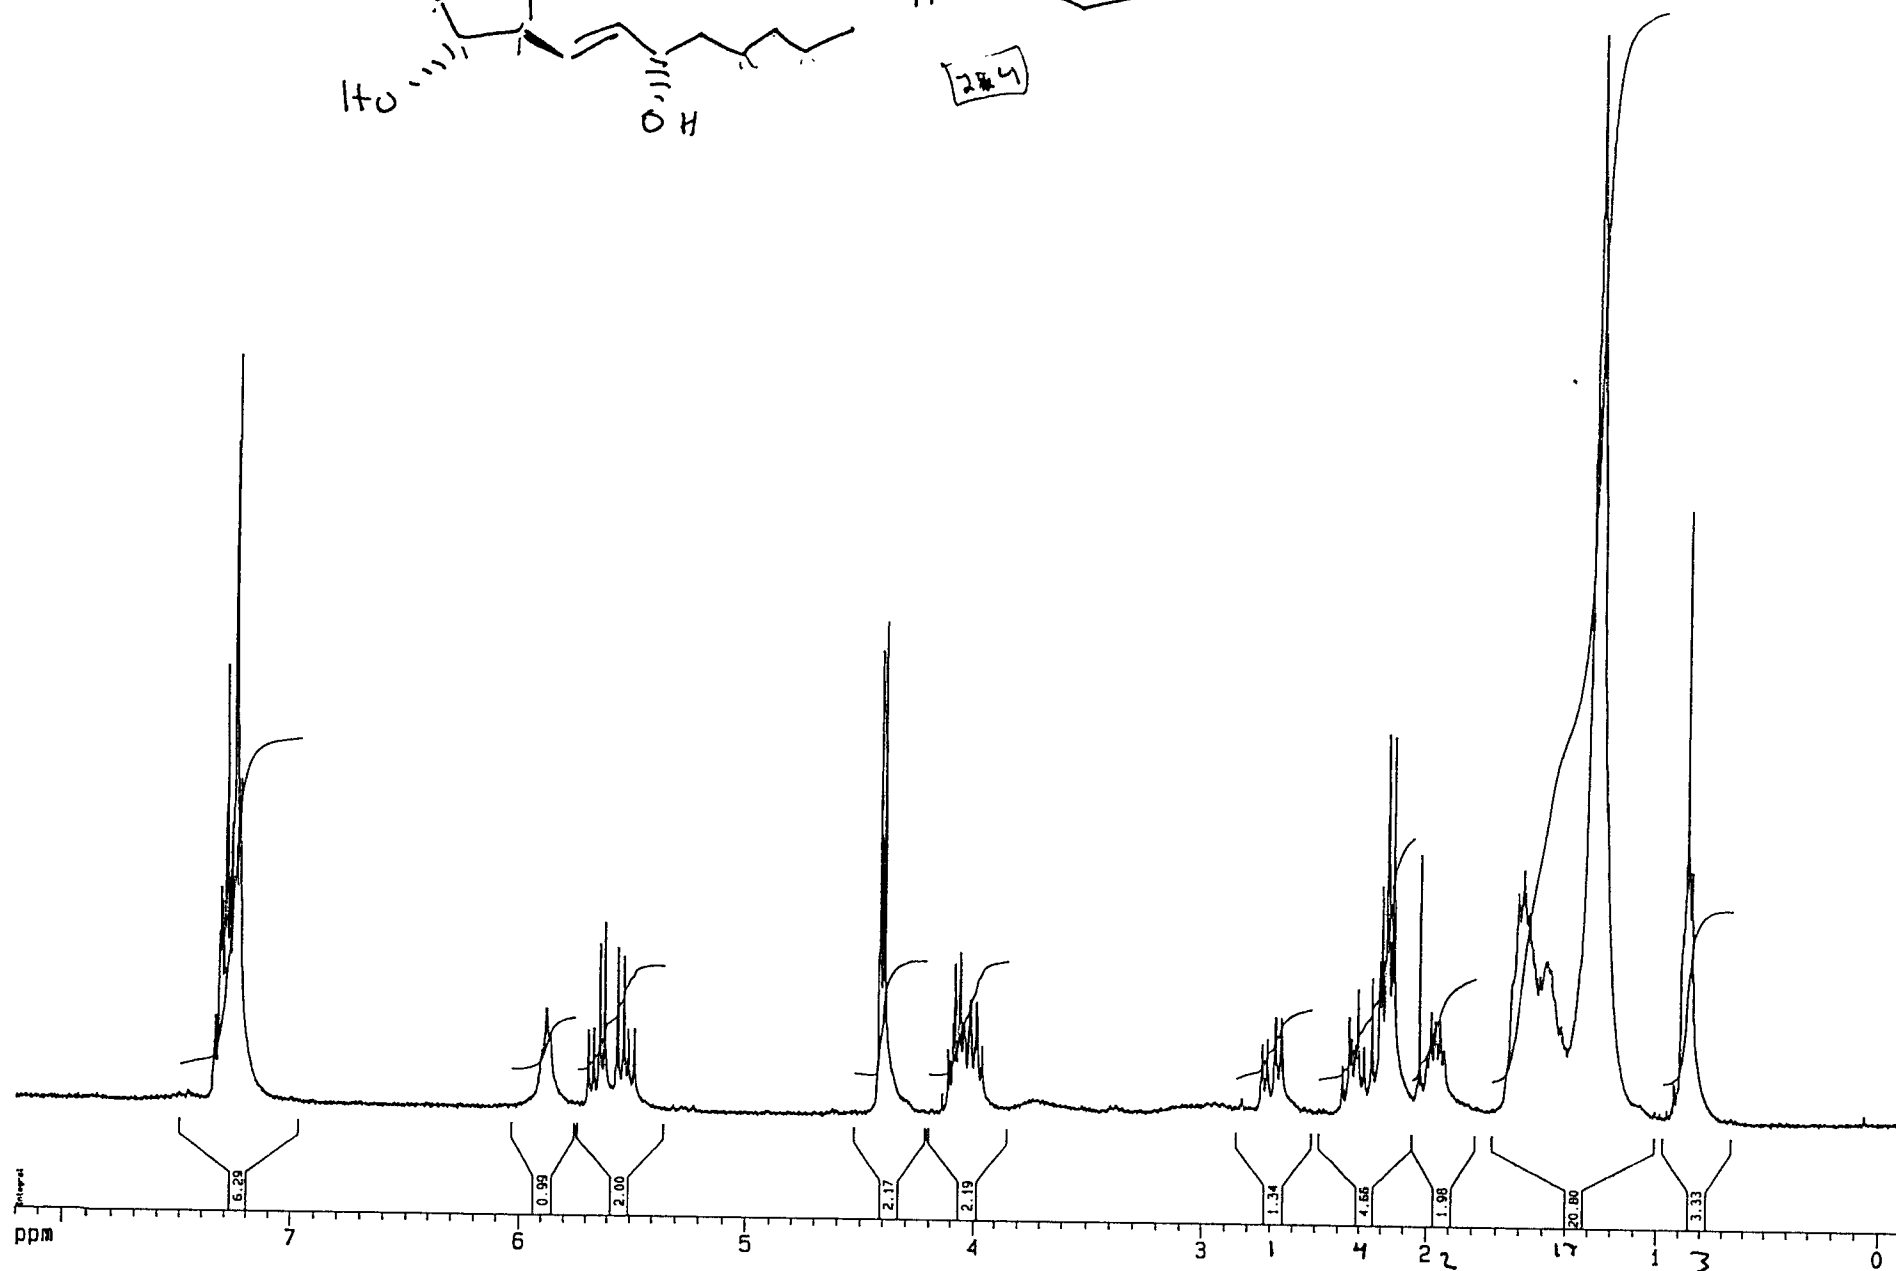

DU=u, USER=drew, NAME=benzylpg, EXPNO=1, PROCNO=1  
 F1=8.200ppm, F2=-0.130ppm, MI=0.00cm, MAXI=10000.00cm, PC=4.000

entry 8

| #  | ADDRESS | FREQUENCY |        | INTENSITY |
|----|---------|-----------|--------|-----------|
|    |         | [Hz]      | [PPM]  |           |
| 1  | 4358.4  | 2205.143  | 7.3472 | 1.12      |
| 2  | 4381.4  | 2200.048  | 7.3302 | 2.22      |
| 3  | 4389.5  | 2198.261  | 7.3243 | 2.82      |
| 4  | 4408.0  | 2194.176  | 7.3107 | 1.95      |
| 5  | 4420.9  | 2191.315  | 7.3011 | 5.74      |
| 6  | 4449.1  | 2185.087  | 7.2804 | 3.63      |
| 7  | 4468.6  | 2180.761  | 7.2660 | 8.79      |
| 8  | 4479.8  | 2178.297  | 7.2578 | 10.01     |
| 9  | 4503.2  | 2173.121  | 7.2405 | 4.23      |
| 10 | 6342.3  | 1766.403  | 5.8854 | 1.27      |
| 11 | 6601.1  | 1709.177  | 5.6947 | 1.00      |
| 12 | 6633.0  | 1702.122  | 5.6712 | 1.02      |
| 13 | 6670.2  | 1693.900  | 5.6438 | 2.13      |
| 14 | 6702.0  | 1686.868  | 5.6204 | 2.40      |
| 15 | 6778.1  | 1670.044  | 5.5643 | 2.08      |
| 16 | 6816.7  | 1661.500  | 5.5359 | 1.96      |
| 17 | 6847.3  | 1654.728  | 5.5133 | 1.01      |
| 18 | 6885.5  | 1646.281  | 5.4852 | 1.01      |
| 19 | 8328.1  | 1327.268  | 4.4223 | 6.05      |
| 20 | 8353.7  | 1321.606  | 4.4034 | 6.44      |
| 21 | 8738.9  | 1236.423  | 4.1196 | 0.80      |
| 22 | 8751.4  | 1233.654  | 4.1104 | 0.66      |
| 23 | 8771.6  | 1229.198  | 4.0955 | 1.16      |
| 24 | 8781.7  | 1226.961  | 4.0881 | 1.92      |
| 25 | 8812.5  | 1220.150  | 4.0654 | 2.08      |
| 26 | 8834.1  | 1215.374  | 4.0494 | 1.14      |
| 27 | 8874.6  | 1206.411  | 4.0196 | 1.45      |
| 28 | 8912.5  | 1198.044  | 3.9917 | 1.43      |
| 29 | 8950.2  | 1189.706  | 3.9639 | 0.85      |
| 30 | 10610.7 | 822.489   | 2.7404 | 0.92      |
| 31 | 10644.8 | 814.950   | 2.7153 | 0.99      |
| 32 | 10694.0 | 804.068   | 2.6790 | 1.28      |
| 33 | 10725.0 | 797.211   | 2.6562 | 1.28      |
| 34 | 11098.8 | 714.554   | 2.3808 | 0.66      |
| 35 | 11137.6 | 705.978   | 2.3522 | 1.30      |
| 36 | 11153.7 | 702.415   | 2.3403 | 1.02      |
| 37 | 11192.1 | 693.912   | 2.3120 | 1.66      |
| 38 | 11231.3 | 685.258   | 2.2832 | 0.91      |
| 39 | 11282.3 | 673.969   | 2.2456 | 1.81      |
| 40 | 11327.1 | 664.069   | 2.2126 | 2.04      |
| 41 | 11340.8 | 661.030   | 2.2025 | 3.02      |
| 42 | 11373.4 | 653.821   | 2.1784 | 5.04      |
| 43 | 11409.5 | 645.836   | 2.1518 | 5.02      |
| 44 | 11570.7 | 610.206   | 2.0331 | 3.51      |
| 45 | 11638.2 | 595.259   | 1.9833 | 1.38      |
| 46 | 11666.8 | 588.944   | 1.9623 | 1.26      |
| 47 | 11693.9 | 582.941   | 1.9423 | 1.27      |
| 48 | 12142.7 | 483.712   | 1.6117 | 2.95      |
| 49 | 12176.5 | 476.230   | 1.5867 | 3.27      |
| 50 | 12313.5 | 445.923   | 1.4858 | 2.07      |
| 51 | 12598.0 | 383.012   | 1.2761 | 14.40     |
| 52 | 12635.7 | 374.687   | 1.2484 | 8.99      |
| 53 | 12667.3 | 367.687   | 1.2251 | 4.16      |
| 54 | 13076.9 | 277.122   | 0.9233 | 0.47      |
| 55 | 13149.8 | 260.982   | 0.8696 | 8.08      |
| 56 | 13179.9 | 254.332   | 0.8474 | 3.25      |



entry 8

<sup>13</sup>C 5mm BB PROBE 5/9/97 RN

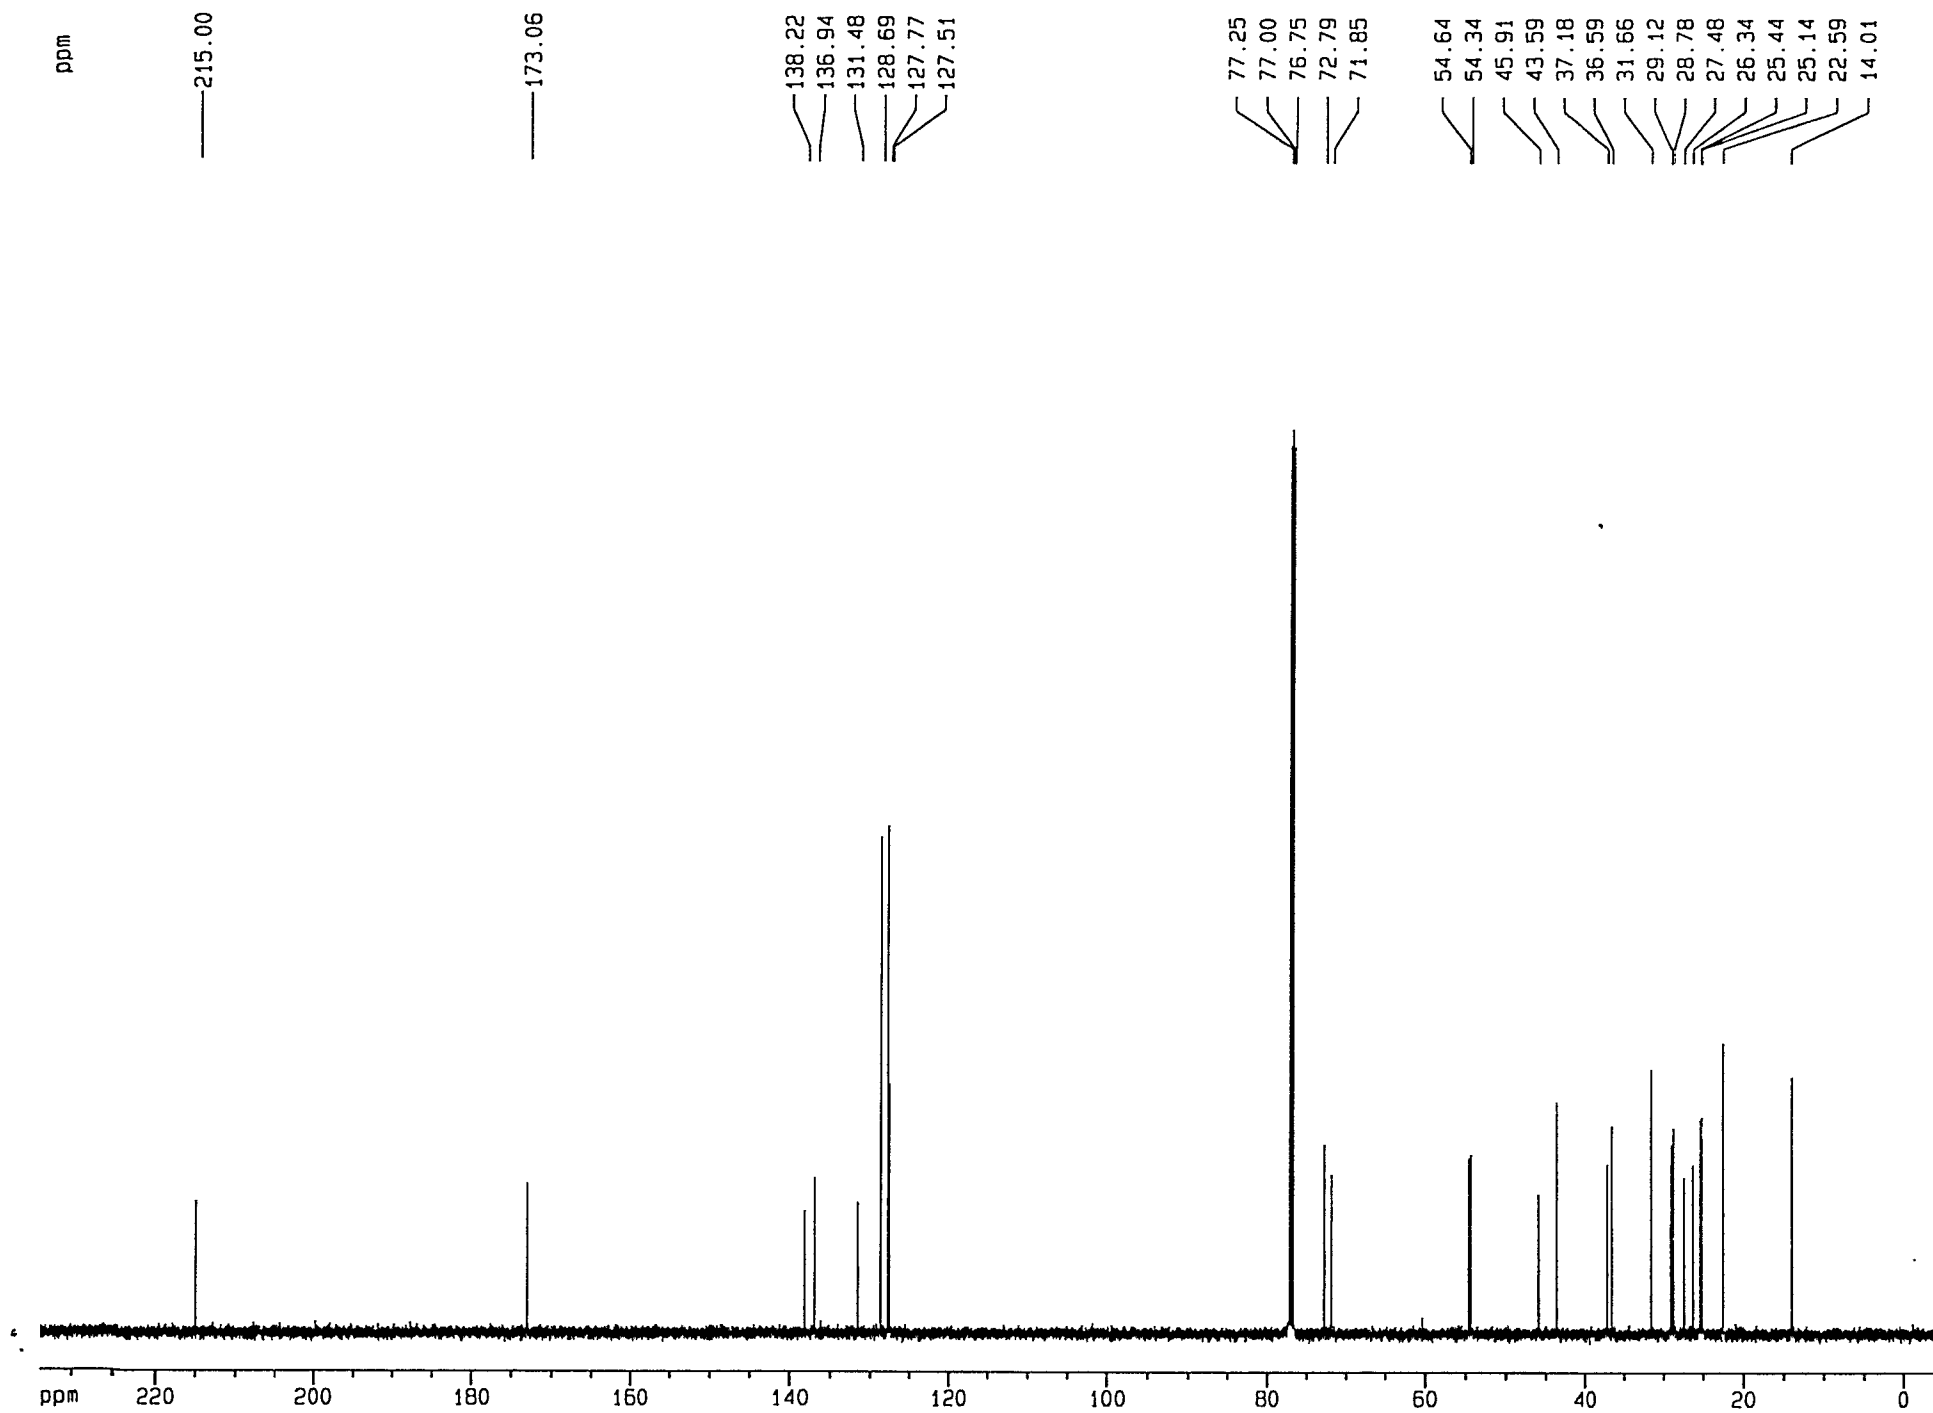

entry 9

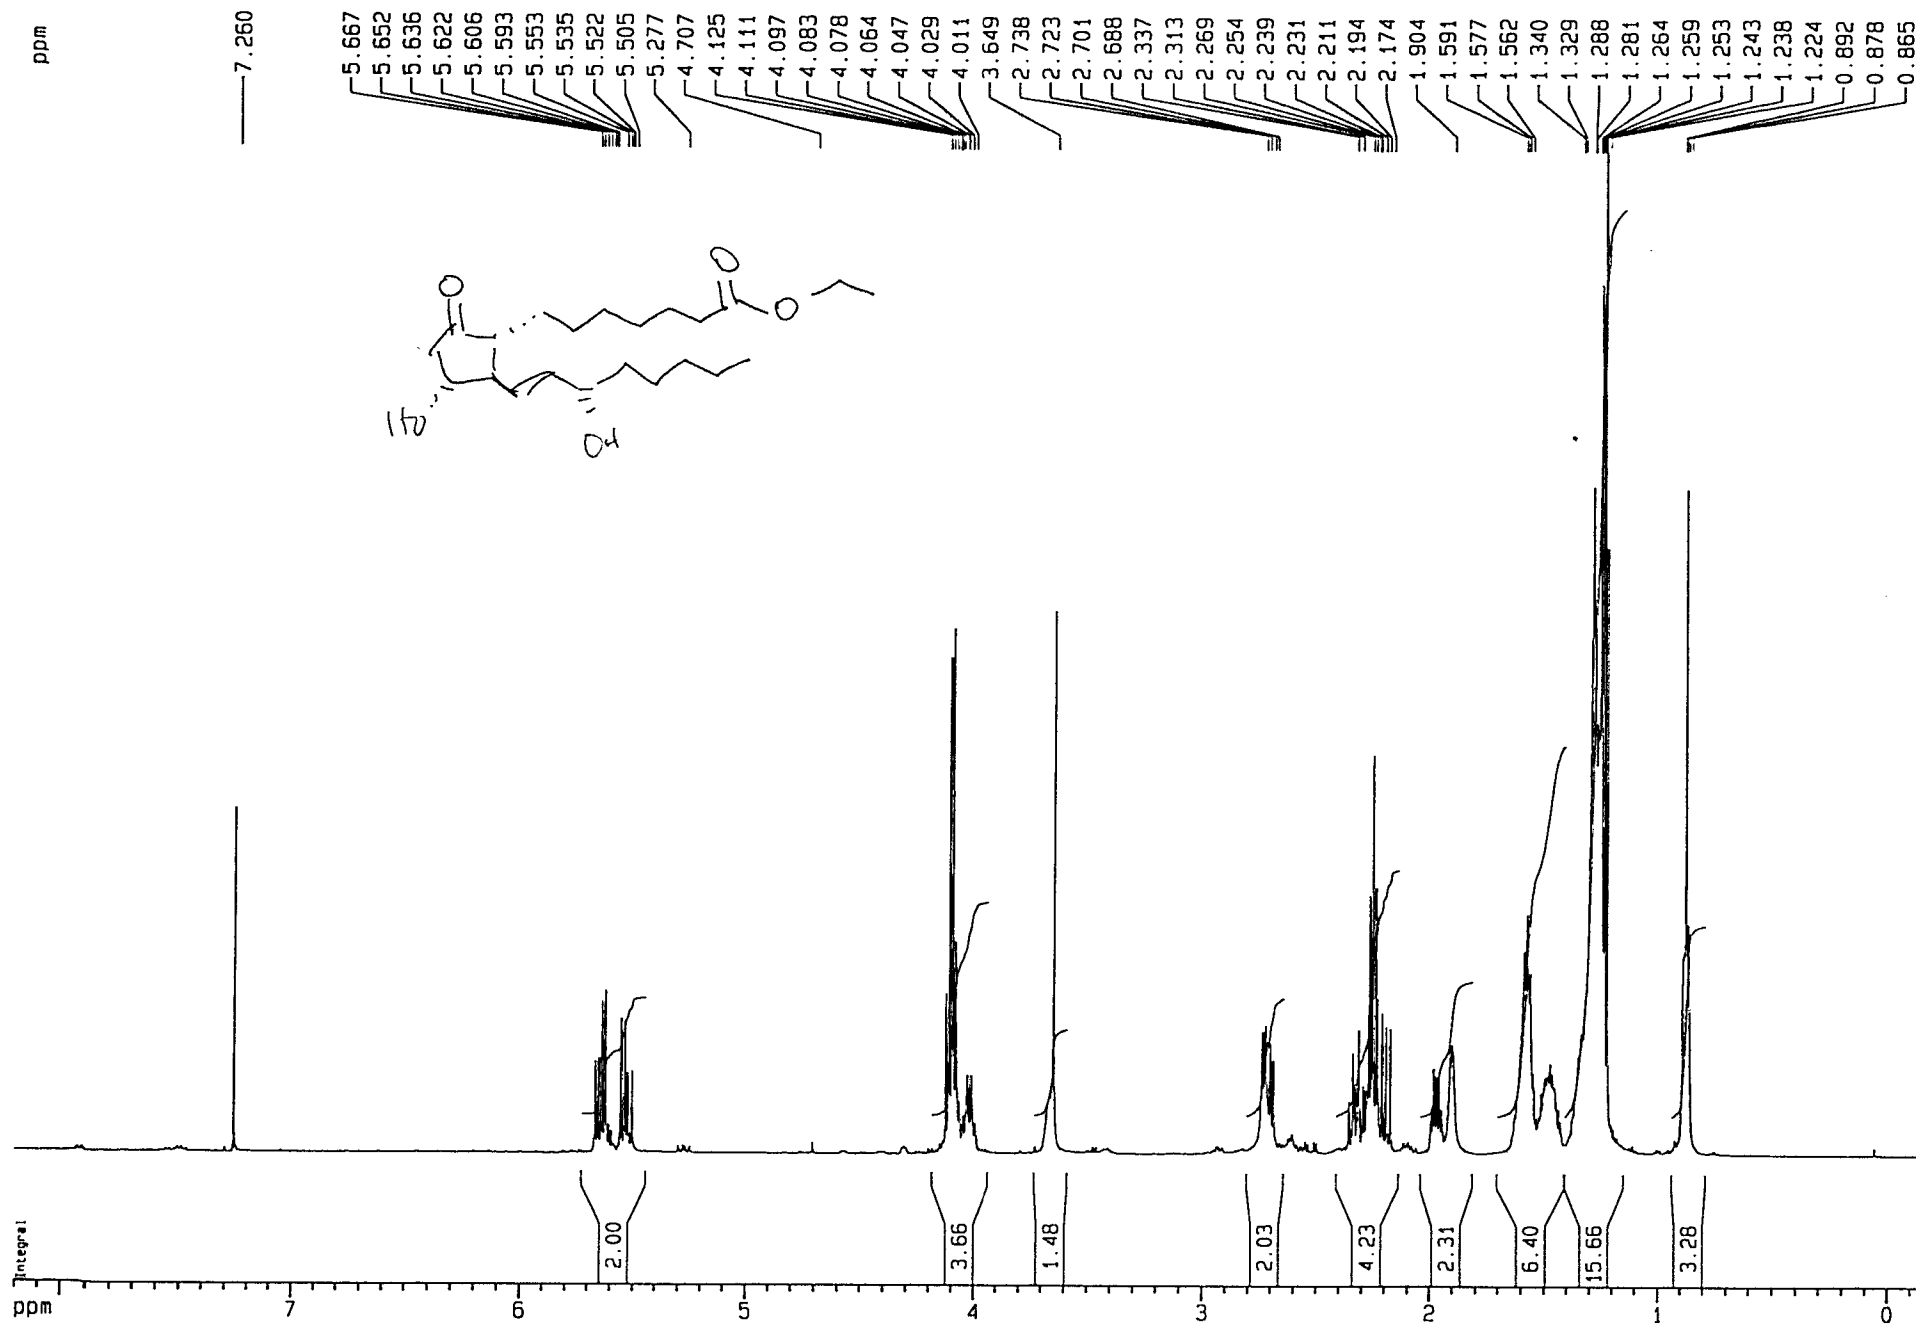

DU=u, USER=drew, NAME=pgeoet2, EXPNO=1, PROCNO=1  
F1=2.840ppm, F2=0.767ppm, MI=0.00cm, MAXI=19.00cm, PC=5.000

entry 9

| #  | ADDRESS | FREQUENCY |        | INTENSITY |
|----|---------|-----------|--------|-----------|
|    |         | [Hz]      | [PPM]  |           |
| 1  | 37847.1 | 1369.274  | 2.7378 | 0.86      |
| 2  | 37896.1 | 1361.792  | 2.7229 | 0.90      |
| 3  | 37967.7 | 1350.865  | 2.7010 | 0.78      |
| 4  | 38010.1 | 1344.401  | 2.6881 | 0.66      |
| 5  | 38275.9 | 1303.841  | 2.6070 | 0.14      |
| 6  | 38467.6 | 1274.593  | 2.5485 | 0.09      |
| 7  | 38506.9 | 1268.590  | 2.5365 | 0.07      |
| 8  | 38593.8 | 1255.330  | 2.5100 | 0.09      |
| 9  | 38632.5 | 1249.426  | 2.4982 | 0.08      |
| 10 | 39102.4 | 1177.737  | 2.3549 | 0.38      |
| 11 | 39159.9 | 1168.957  | 2.3373 | 0.71      |
| 12 | 39181.1 | 1165.716  | 2.3308 | 0.48      |
| 13 | 39218.3 | 1160.045  | 2.3195 | 0.46      |
| 14 | 39239.0 | 1156.892  | 2.3132 | 0.87      |
| 15 | 39297.3 | 1147.997  | 2.2954 | 0.48      |
| 16 | 39326.1 | 1143.601  | 2.2866 | 0.45      |
| 17 | 39383.8 | 1134.794  | 2.2690 | 1.81      |
| 18 | 39432.9 | 1127.293  | 2.2540 | 2.80      |
| 19 | 39482.8 | 1119.684  | 2.2388 | 1.86      |
| 20 | 39509.8 | 1115.562  | 2.2305 | 1.09      |
| 21 | 39574.6 | 1105.679  | 2.2108 | 0.99      |
| 22 | 39630.9 | 1097.092  | 2.1936 | 0.89      |
| 23 | 39695.5 | 1087.227  | 2.1739 | 0.89      |
| 24 | 39948.3 | 1048.662  | 2.0968 | 0.09      |
| 25 | 40284.4 | 997.369   | 1.9942 | 0.29      |
| 26 | 40320.7 | 991.836   | 1.9832 | 0.61      |
| 27 | 40360.0 | 985.837   | 1.9712 | 0.55      |
| 28 | 40399.6 | 979.796   | 1.9591 | 0.54      |
| 29 | 40438.2 | 973.899   | 1.9473 | 0.32      |
| 30 | 40581.3 | 952.070   | 1.9036 | 0.77      |
| 31 | 41606.6 | 795.616   | 1.5908 | 1.42      |
| 32 | 41652.8 | 788.565   | 1.5767 | 1.68      |
| 33 | 41702.3 | 781.023   | 1.5616 | 1.28      |
| 34 | 41749.7 | 773.789   | 1.5472 | 0.57      |
| 35 | 41855.9 | 757.584   | 1.5148 | 0.43      |
| 36 | 41900.3 | 750.810   | 1.5012 | 0.54      |
| 37 | 41920.4 | 747.736   | 1.4951 | 0.55      |
| 38 | 41964.7 | 740.977   | 1.4816 | 0.58      |
| 39 | 41987.6 | 737.483   | 1.4746 | 0.64      |
| 40 | 42017.7 | 732.887   | 1.4654 | 0.57      |
| 41 | 42076.1 | 723.977   | 1.4476 | 0.38      |
| 42 | 42110.5 | 718.731   | 1.4371 | 0.32      |
| 43 | 42147.1 | 713.152   | 1.4259 | 0.23      |
| 44 | 42428.8 | 670.159   | 1.3400 | 0.85      |
| 45 | 42464.5 | 664.710   | 1.3291 | 0.92      |
| 46 | 42599.4 | 644.129   | 1.2879 | 4.68      |
| 47 | 42620.6 | 640.892   | 1.2815 | 3.69      |
| 48 | 42677.7 | 632.189   | 1.2640 | 2.97      |
| 49 | 42695.4 | 629.478   | 1.2586 | 3.21      |
| 50 | 42715.2 | 626.466   | 1.2526 | 6.11      |
| 51 | 42746.8 | 621.636   | 1.2429 | 1.49      |
| 52 | 42762.0 | 619.317   | 1.2383 | 9.00      |
| 53 | 42808.8 | 612.171   | 1.2240 | 4.26      |
| 54 | 42904.6 | 597.561   | 1.1948 | 0.19      |
| 55 | 43897.7 | 446.020   | 0.8918 | 1.39      |
| 56 | 43942.2 | 439.229   | 0.8782 | 4.67      |

13C 5mm BB PROBE 5/9/97 RN

entry 9

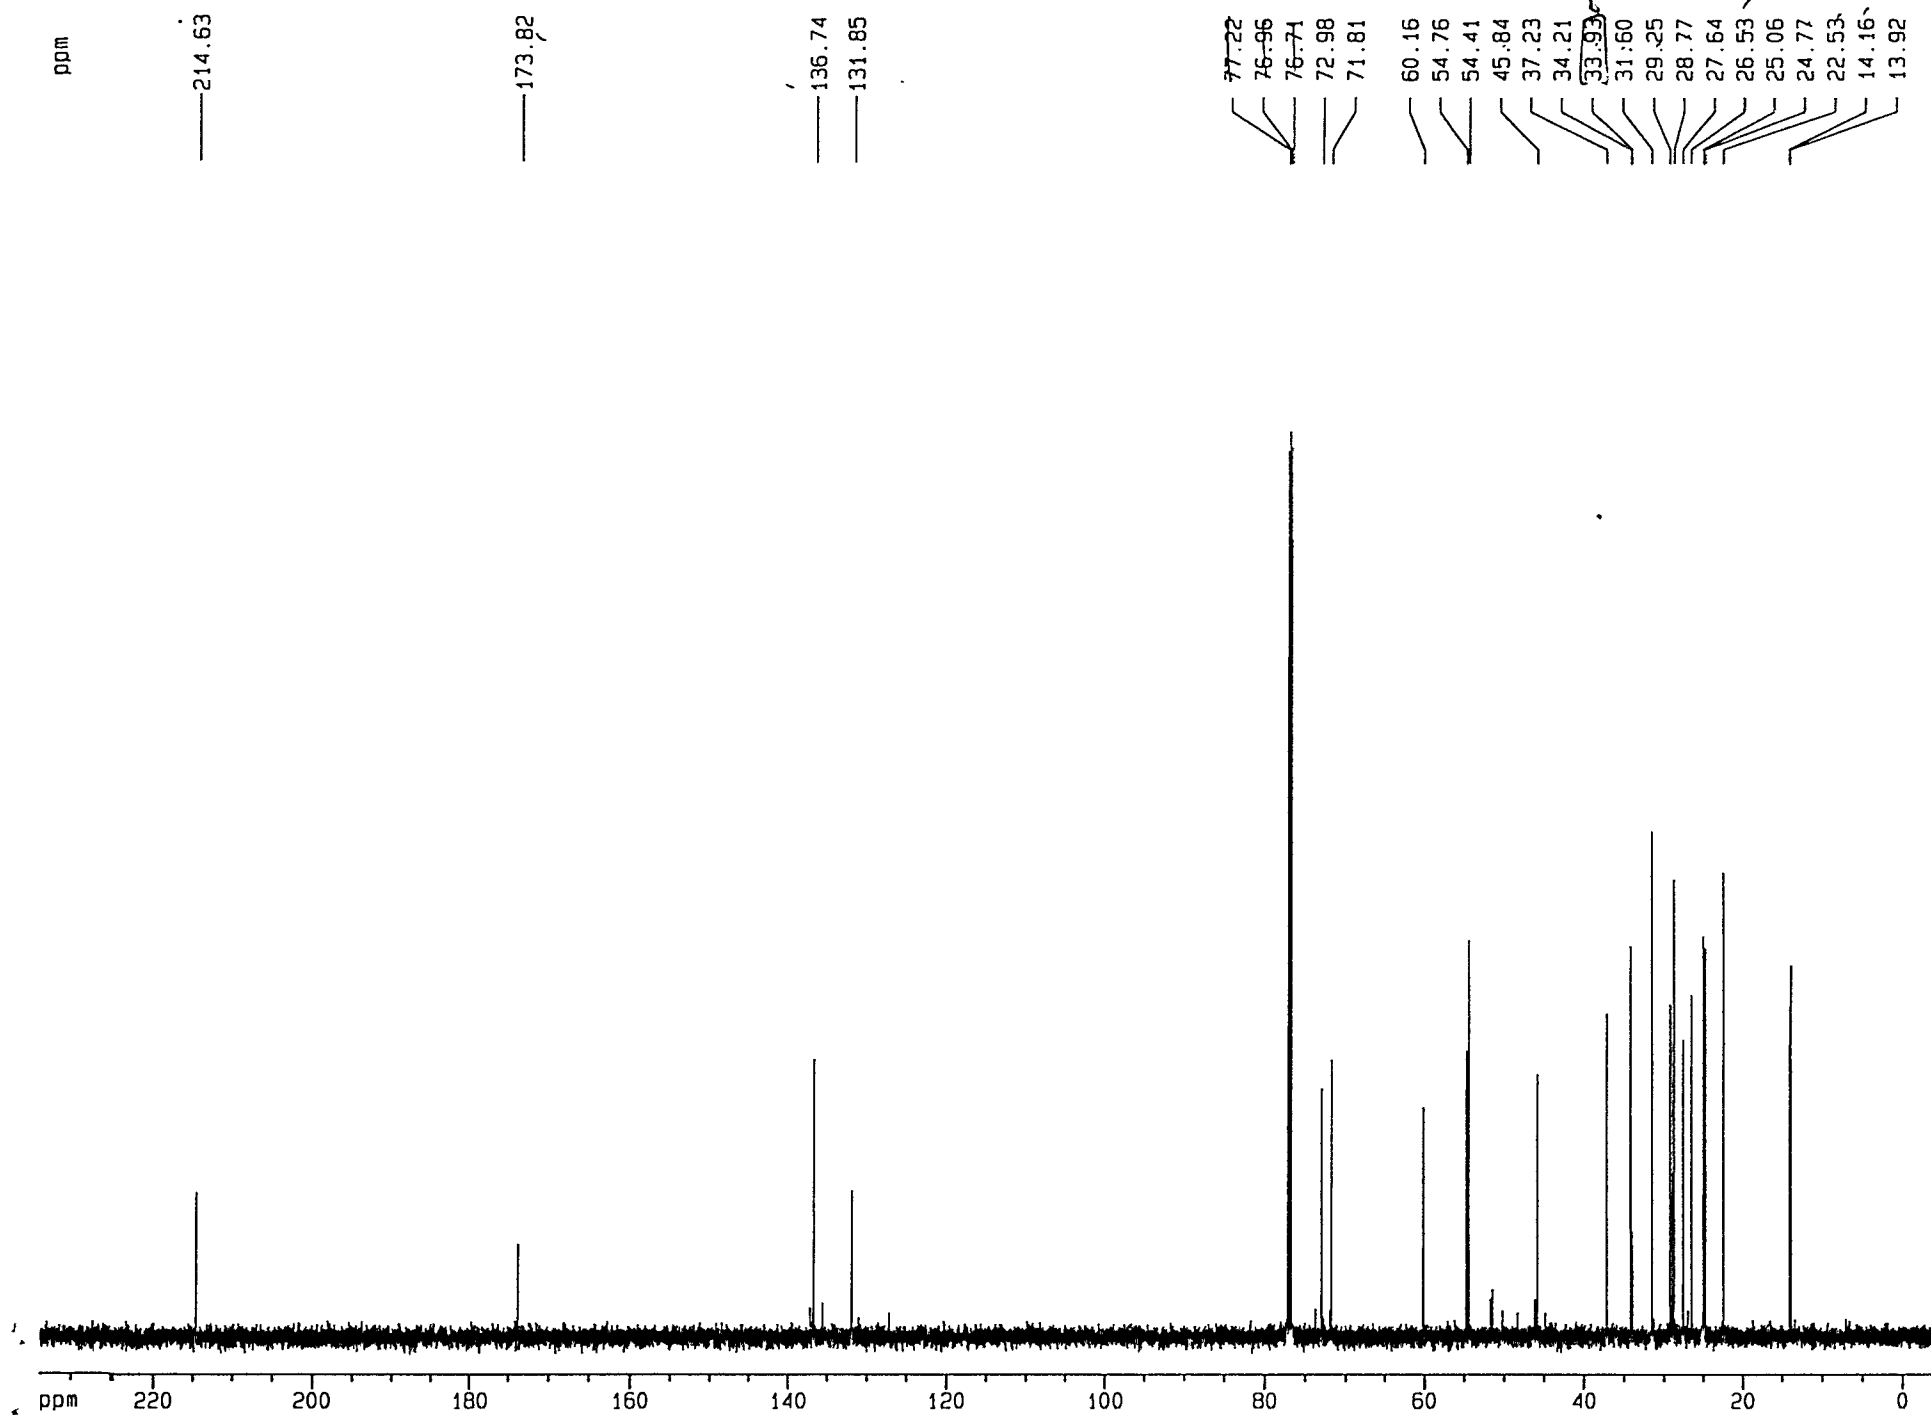

entry 18

Hz

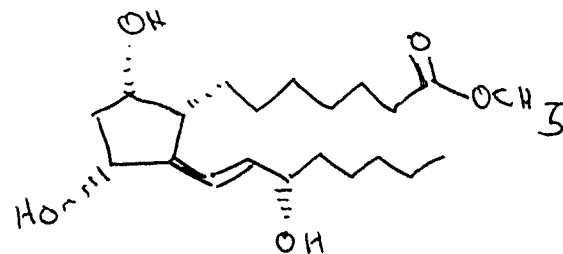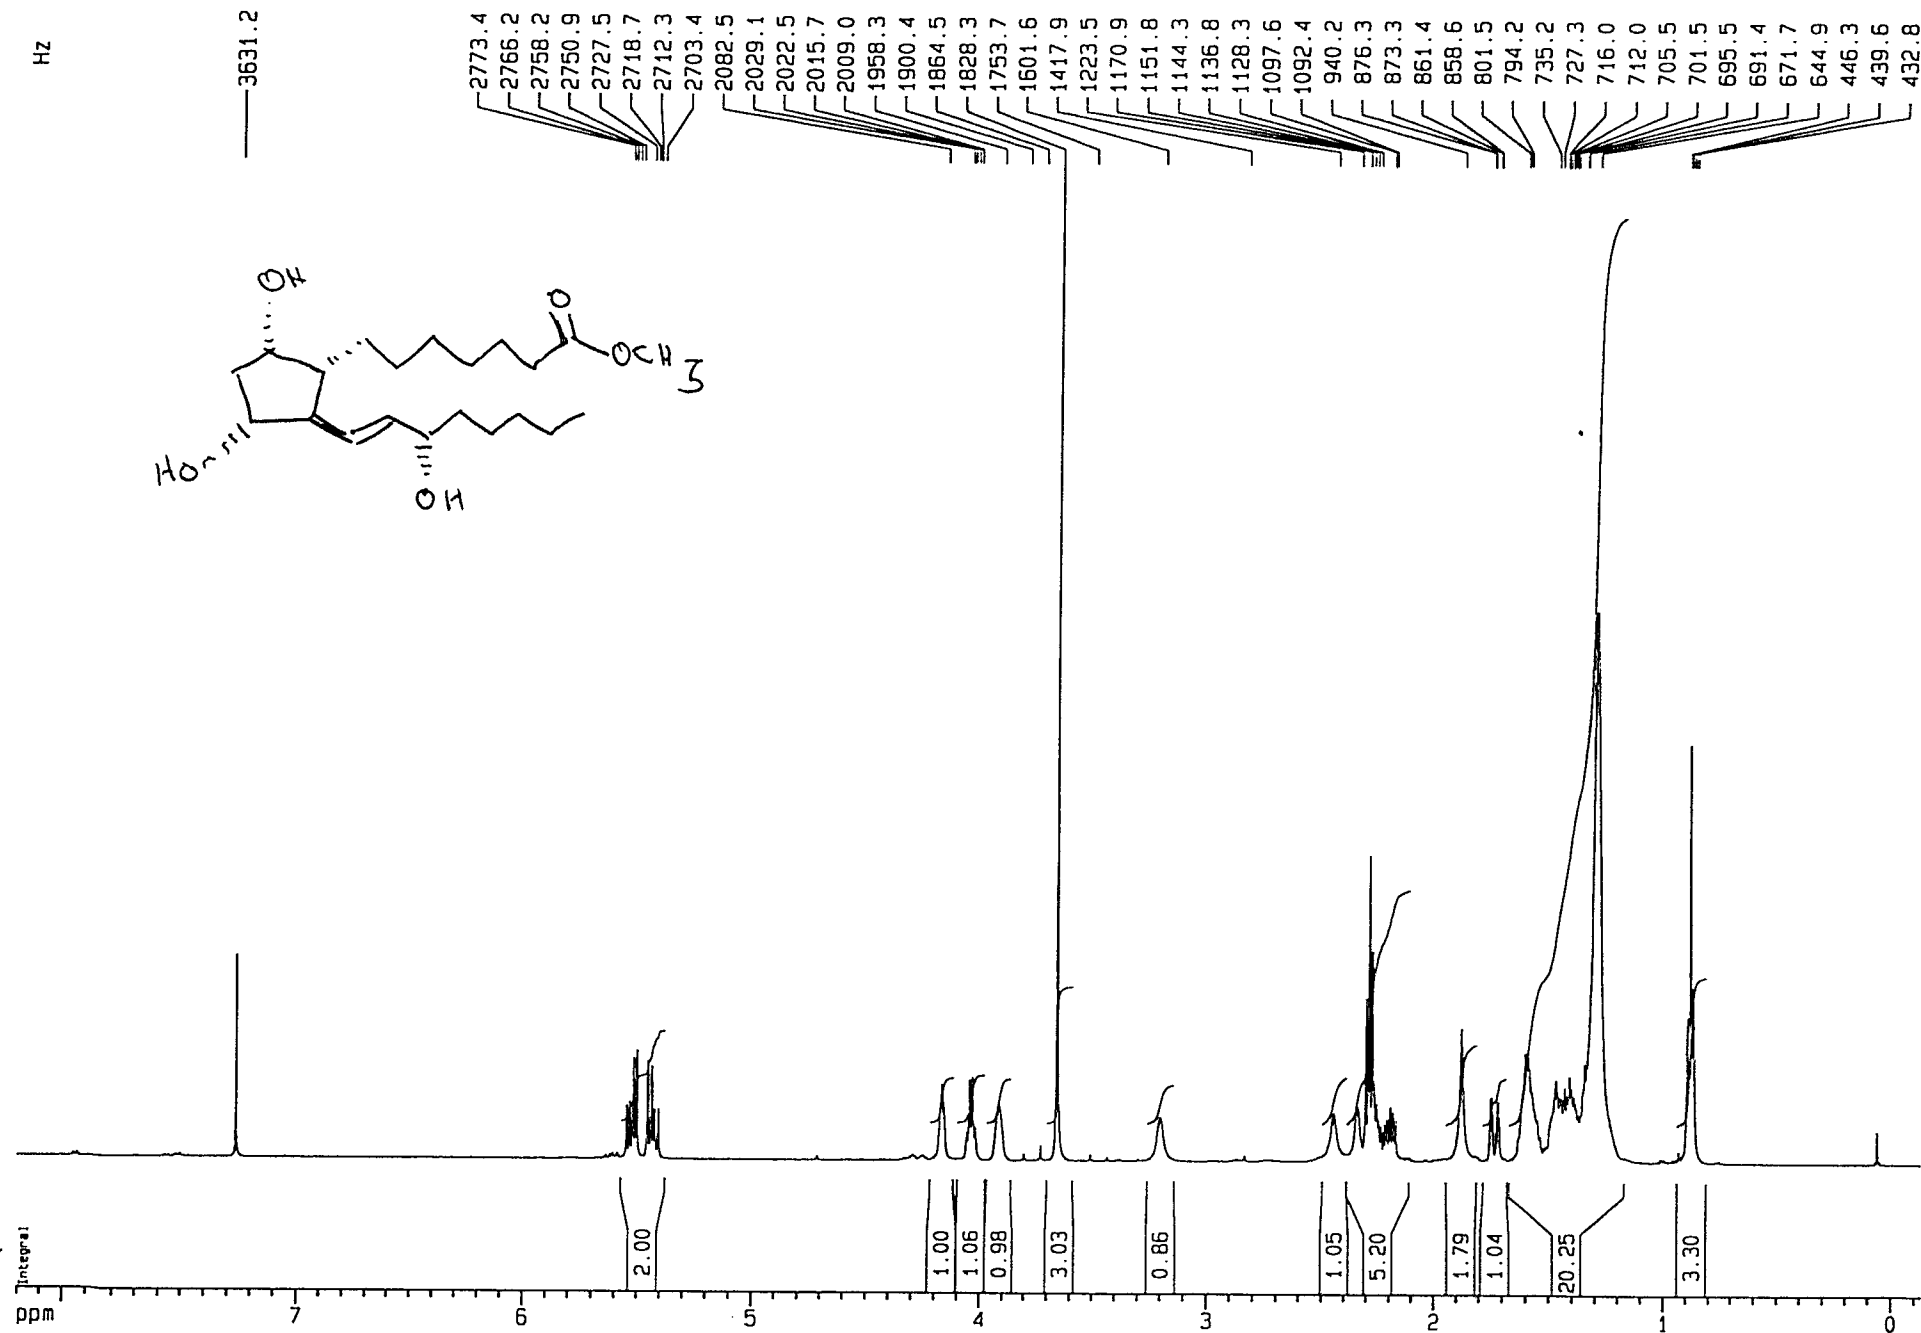

DU=u, USER=drew, NAME=pgfome2, EXPNO=1, PROCNO=1  
 F1=14.285ppm, F2=-5.710ppm, MI=0.00cm, MAXI=19.00cm, PC=5.000

| #  | ADDRESS | FREQUENCY<br>[Hz] | INTENSITY<br>[PPM] |
|----|---------|-------------------|--------------------|
| 1  | 23023.5 | 3631.173          | 7.2605             |
| 2  | 28644.8 | 2773.431          | 5.5454             |
| 3  | 28692.2 | 2766.194          | 5.5309             |
| 4  | 28744.6 | 2758.209          | 5.5150             |
| 5  | 28792.3 | 2750.925          | 5.5004             |
| 6  | 28945.6 | 2727.541          | 5.4537             |
| 7  | 29003.7 | 2718.662          | 5.4359             |
| 8  | 29045.3 | 2712.322          | 5.4232             |
| 9  | 29103.5 | 2703.445          | 5.4055             |
| 10 | 33173.1 | 2082.468          | 4.1639             |
| 11 | 33522.6 | 2029.137          | 4.0572             |
| 12 | 33566.1 | 2022.505          | 4.0440             |
| 13 | 33610.9 | 2015.659          | 4.0303             |
| 14 | 33654.9 | 2008.955          | 4.0169             |
| 15 | 33986.9 | 1958.287          | 3.9156             |
| 16 | 34366.3 | 1900.403          | 3.7998             |
| 17 | 34601.9 | 1864.456          | 3.7279             |
| 18 | 34838.7 | 1828.314          | 3.6557             |
| 19 | 35327.5 | 1753.729          | 3.5065             |
| 20 | 36324.2 | 1601.642          | 3.2025             |
| 21 | 37528.1 | 1417.947          | 2.8352             |
| 22 | 38802.2 | 1223.530          | 2.4464             |
| 23 | 39147.0 | 1170.924          | 2.3412             |
| 24 | 39272.5 | 1151.773          | 2.3029             |
| 25 | 39321.4 | 1144.312          | 2.2880             |
| 26 | 39370.5 | 1136.815          | 2.2730             |
| 27 | 39426.4 | 1128.294          | 2.2560             |
| 28 | 39453.6 | 1124.141          | 2.2477             |
| 29 | 39489.8 | 1118.616          | 2.2367             |
| 30 | 39531.1 | 1112.313          | 2.2240             |
| 31 | 39564.4 | 1107.234          | 2.2139             |
| 32 | 39582.6 | 1104.457          | 2.2083             |
| 33 | 39627.7 | 1097.573          | 2.1946             |
| 34 | 39661.8 | 1092.380          | 2.1842             |
| 35 | 39679.7 | 1089.647          | 2.1787             |
| 36 | 39712.9 | 1084.577          | 2.1686             |
| 37 | 40659.4 | 940.152           | 1.8798             |
| 38 | 41078.0 | 876.277           | 1.7521             |
| 39 | 41097.6 | 873.294           | 1.7461             |
| 40 | 41175.3 | 861.431           | 1.7224             |
| 41 | 41193.6 | 858.638           | 1.7168             |
| 42 | 41568.4 | 801.453           | 1.6025             |
| 43 | 41616.1 | 794.170           | 1.5879             |
| 44 | 42002.8 | 735.160           | 1.4699             |
| 45 | 42054.1 | 727.330           | 1.4543             |
| 46 | 42128.6 | 715.963           | 1.4316             |
| 47 | 42154.8 | 711.968           | 1.4236             |
| 48 | 42197.3 | 705.481           | 1.4106             |
| 49 | 42223.5 | 701.483           | 1.4026             |
| 50 | 42262.5 | 695.543           | 1.3907             |
| 51 | 42289.5 | 691.416           | 1.3825             |
| 52 | 42418.6 | 671.717           | 1.3431             |
| 53 | 42594.1 | 644.943           | 1.2896             |
| 54 | 43776.0 | 464.593           | 0.9289             |
| 55 | 43895.9 | 446.307           | 0.8924             |
| 56 | 43939.7 | 439.613           | 0.8790             |

entry 10

ppm

174.35

135.00  
133.19

78.04  
77.25  
77.00  
76.75  
73.15  
73.00

56.15  
51.46  
50.11  
42.94  
37.20  
33.99  
31.69  
29.45  
28.96  
27.74  
27.58  
25.20  
24.77  
22.62  
13.99

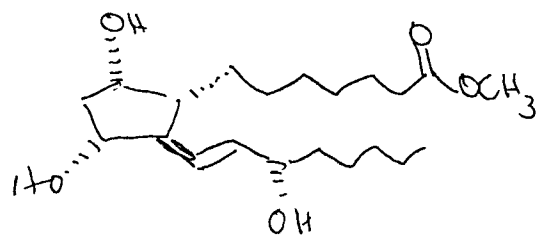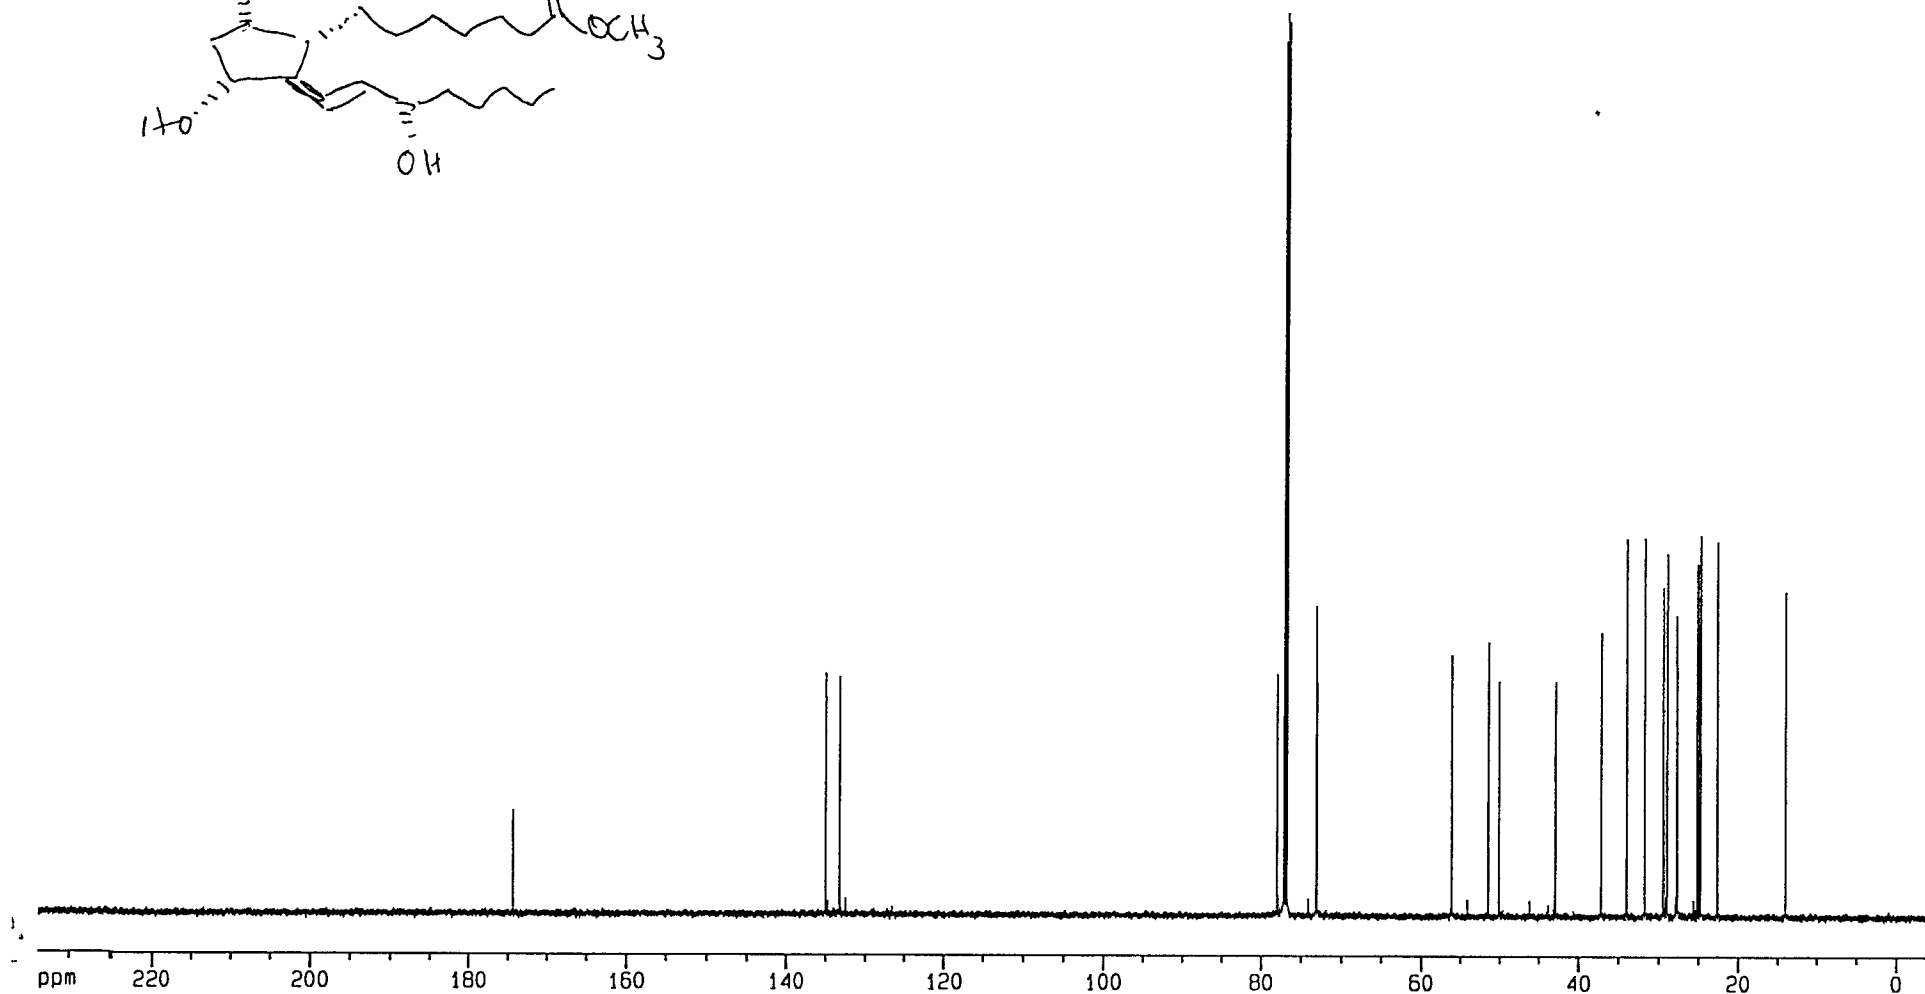

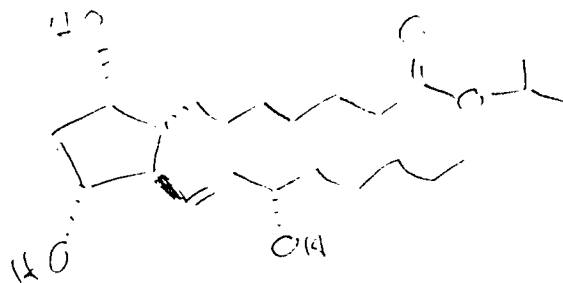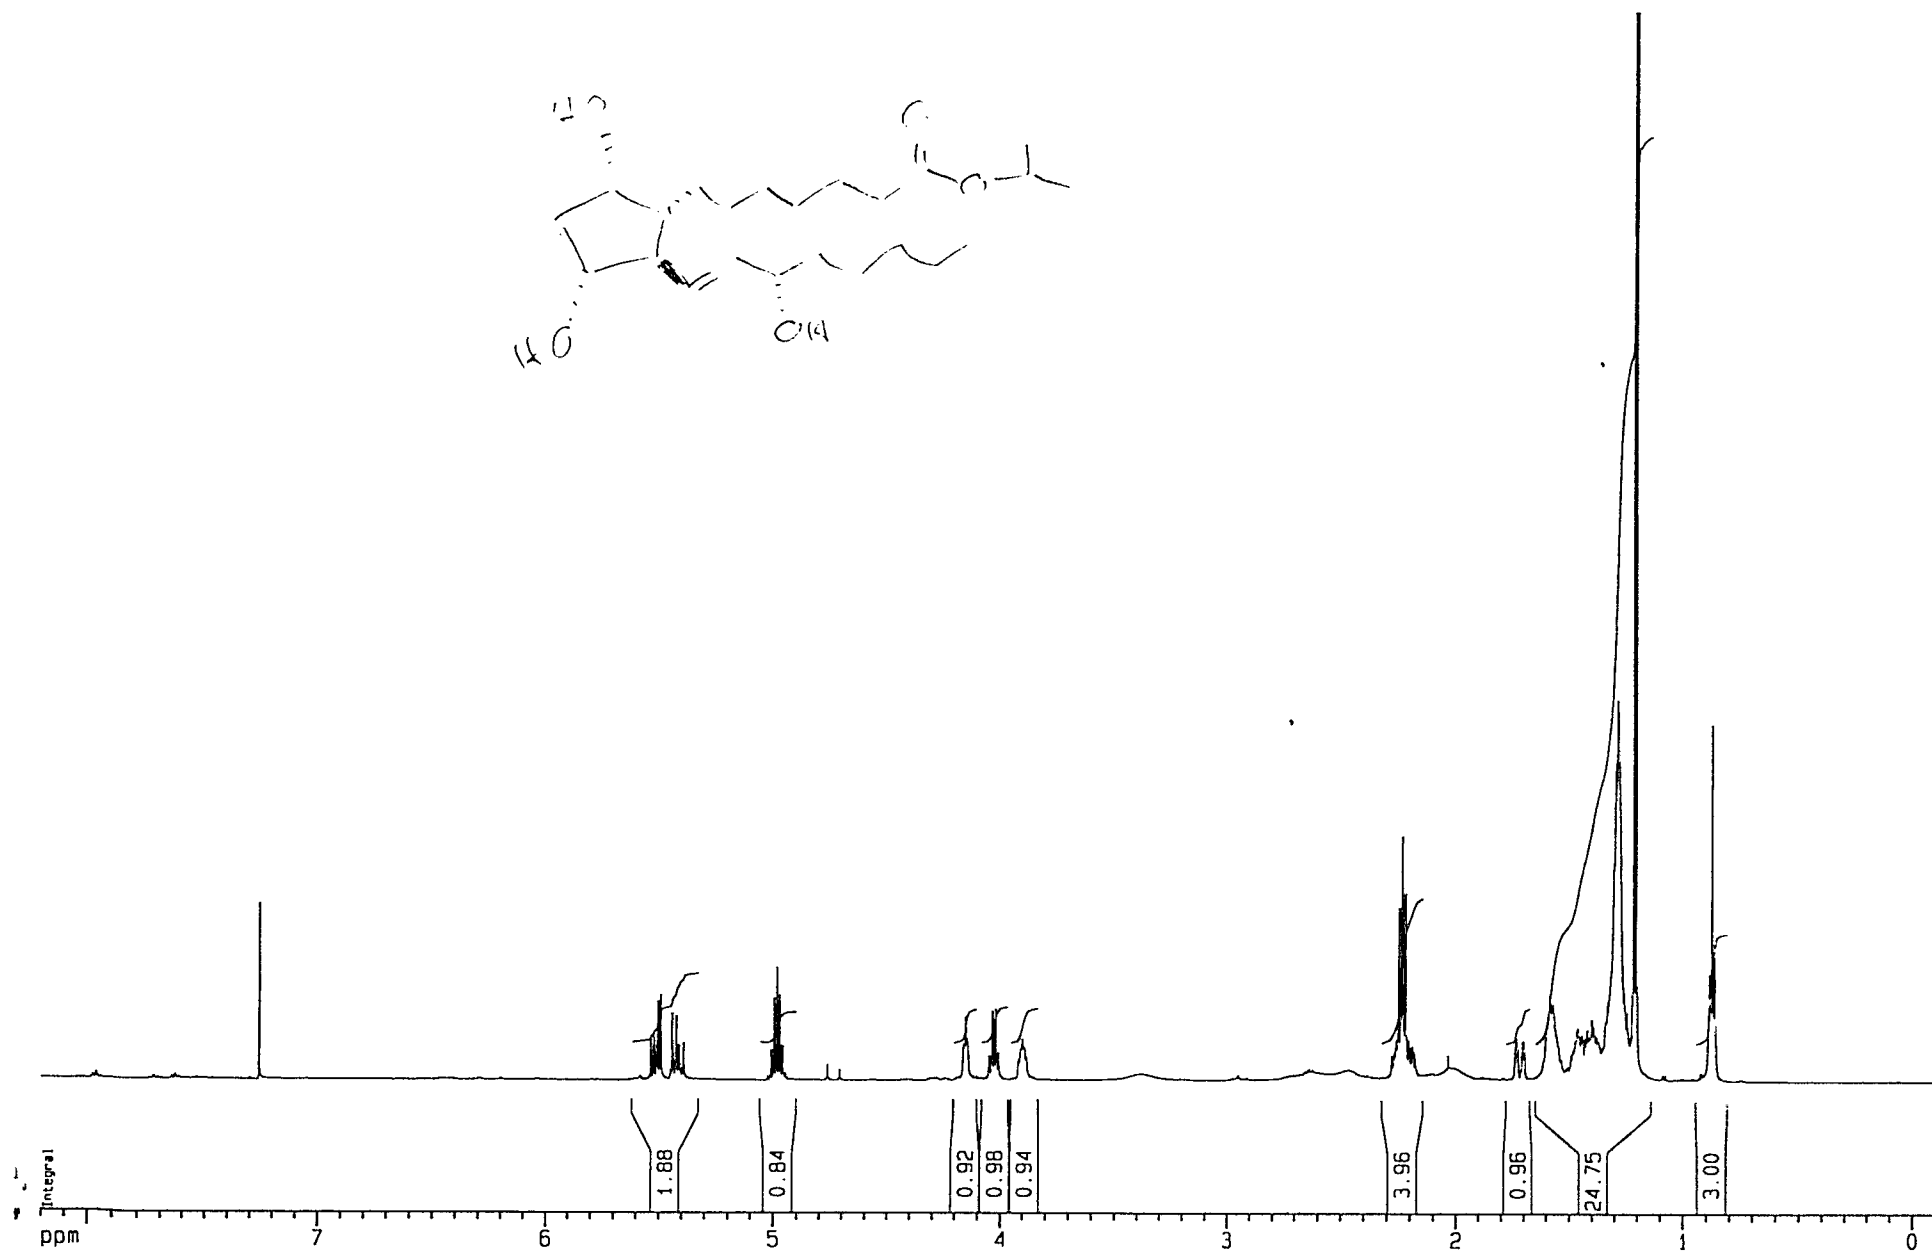



entry II

ppm

173.48

134.98  
133.19

78.05  
72.25  
72.00  
36.75  
73.15  
73.01  
67.41  
56.17  
50.13  
42.93  
37.20  
34.61  
31.69  
29.47  
28.94  
27.75  
27.58  
25.20  
24.84  
22.52  
21.83  
14.00

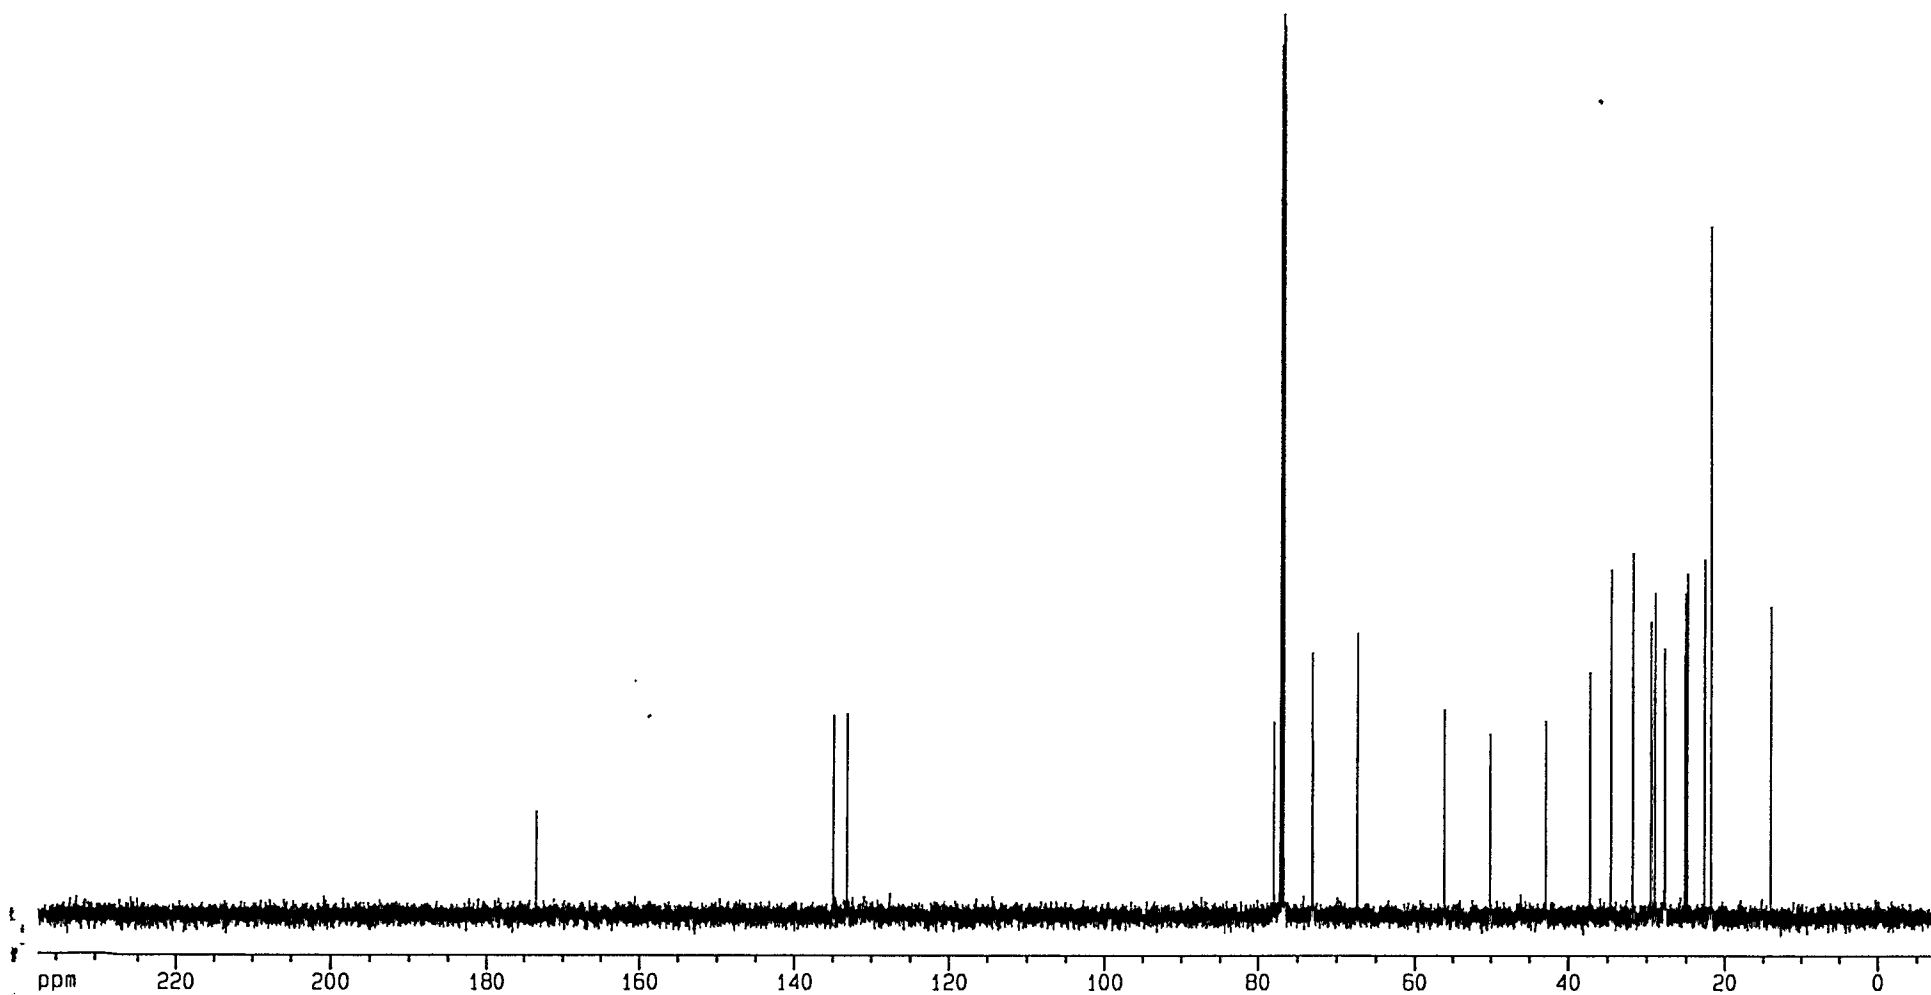

Supplement: Supplementary file 1 [file 5800275]
